# Supplementary material for: Ru–Mg promoted reductive cross-coupling of allyl bromides and alkenes to synthesize 1,7-octadienes with an all-carbon quaternary center
Source: Royal Society of Chemistry journal article supplement (doi:10.1039/d4ob00116h), 2024-01-01

Supporting Information for:

**Ru-Mg promoted reductive cross-coupling of allyl bromides and  
alkenes to 1,7-Octadienes with an all-carbon quaternary center**

Shurong Zhang, Xinjie Zhao and Guiping Qin\*

Faculty of Science, Kunming University of Science and Technology, Kunming  
650500, P. R. China

E-mail: [qin-guiping@kust.edu.cn](mailto:qin-guiping@kust.edu.cn)

**CONTENTS**

|                                                                                        |     |
|----------------------------------------------------------------------------------------|-----|
| 1. General experimental details and materials .....                                    | S2  |
| 2. Optimization of the reaction conditions.....                                        | S3  |
| 3. General procedure .....                                                             | S7  |
| 4. Experimental characterization data for products .....                               | S8  |
| 5. Scale-up experiment.....                                                            | S19 |
| 6. Radical test.....                                                                   | S20 |
| 7. References.....                                                                     | S20 |
| 8. Copies for <sup>1</sup> H NMR and <sup>13</sup> C NMR spectra of the products ..... | S21 |

## 1. General experimental details and materials

All non-aqueous reactions and manipulations were using standard Schlenk techniques. All solvents before use were dried and degassed by standard methods and stored under argon atmosphere. All reactions were monitored by TLC with silica gel-coated plates. For chromatography, 200-300 mesh silica gel (Qingdao, China) was employed.  $^1\text{H}$  NMR,  $^{13}\text{C}$  NMR spectra were measured in  $\text{CDCl}_3$  and recorded on Bruker Avance III 500 MHz, Bruker Avance III HD (600 MHz, Bruker BioSpin, Switzerland). Chemical shifts ( $\delta$ ) were given in ppm, referenced to the residual proton resonance of  $\text{CDCl}_3$  (7.26), to the carbon resonance of  $\text{CDCl}_3$  (77.16). Coupling constants ( $J$ ) were reported in Hertz (Hz) and referred to apparent peak multiplications. The term m, q, t, d, s referred to multiplet, quartet, triplet, doublet, singlet respectively. GC-MS spectra were recorded on a ThermoFisher Scientific ISQ 7000 Series GC-MS system. High resolution mass spectra were recorded on a high-resolution mass spectrometer using electrospray ionization (ESI) techniques.

The electron-deficient olefins **1** and allyl bromides **2** were known compounds and synthesized according to the reported methods.<sup>1-14</sup> Unless extra specified, the used catalysts, reductants, ligands, and solvents etc. were all purchased from Energy.

## 2. Optimization of the reaction conditions

Ethyl 2-benzylacrylate **1a** (38.0 mg, 0.20 mmol), (3-bromoprop-1-en-2-yl)benzene **2a** (118.2 mg, 0.60 mmol), catalyst (x mol%), reductant (x mol%), ligand (x mol%) and solvent (2.0 mL) were added in a flame-dried Young-type tube. The mixture was degassed by the freeze-thaw method, and then stirred under argon at designed temperature for designed hours. Upon completion of the reaction, the reaction mixture was treated with saturated  $\text{NH}_4\text{Cl}_{(\text{aq})}$  (25 mL), extracted with ethyl acetate (3 x 10 mL), washed with saturated  $\text{NaCl}_{(\text{aq})}$  (3 x 10 mL), and dried over  $\text{Na}_2\text{SO}_4$ . Then, the solvent (ethyl acetate) was removed in vacuo and the residue was purified by flash column chromatography on silica gel and eluted with ethyl acetate/petroleum ether (1/100) to afford the desired product **3aa**.

**Table S1. Screening of the reductant <sup>a</sup>**

| 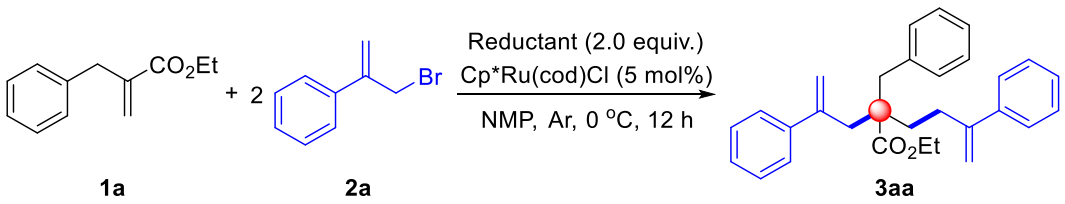 |                          |           |
|-------------------------------------------------------------------------------------|--------------------------|-----------|
| Entry                                                                               | Reductant (2.0 equiv.)   | Yield (%) |
| <b>1</b>                                                                            | <b>Mg</b>                | <b>61</b> |
| 2                                                                                   | Fe                       | NR        |
| 3                                                                                   | Cu                       | NR        |
| 4                                                                                   | Mn                       | NR        |
| 5                                                                                   | In                       | Trace     |
| 6                                                                                   | Ni                       | NR        |
| 7                                                                                   | Zn                       | Trace     |
| 8                                                                                   | V                        | NR        |
| 9                                                                                   | Sn                       | NR        |
| 10                                                                                  | $\text{B}_2\text{Pin}_2$ | NR        |

<sup>a</sup> Reaction condition: **1a** (38.0 mg, 0.2 mmol), **2a** (118.2 mg, 0.6 mmol), reductant (0.4 mmol, 2.0 equiv.),  $\text{Cp}^*\text{Ru}(\text{cod})\text{Cl}$  (0.01 mmol, 5 mol%), and NMP (2.0 mL) under the Ar at 0 °C for 12 h, isolated yields, NR = No Reaction.

**Table S2. Screening of the solvent <sup>a</sup>**

$\text{1a} + 2 \text{ 2a} \xrightarrow[\text{Solvent, Ar, 0 } ^\circ\text{C, 12 h}]{\text{Mg (2.0 equiv.)}, \text{Cp}^*\text{Ru(cod)Cl (5 mol\%)}}$ 
 $\text{3aa}$

| Entry    | Solvent (2.0 mL) | Yield (%) |
|----------|------------------|-----------|
| <b>1</b> | <b>NMP</b>       | <b>61</b> |
| 2        | DMF              | 20        |
| 3        | DMAc             | 42        |
| 4        | NEt <sub>3</sub> | NR        |
| 5        | EtOAc            | NR        |
| 6        | Toluene          | NR        |
| 7        | THF              | ND        |
| 8        | DCM              | NR        |
| 9        | DMSO             | ND        |
| 10       | DCE              | NR        |
| 11       | MeCN             | NR        |

<sup>a</sup> Reaction condition: **1a** (38.0 mg, 0.2 mmol), **2a** (118.2 mg, 0.6 mmol), Mg (0.4 mmol, 2.0 equiv.), Cp\*Ru(cod)Cl (0.01 mmol, 5 mol%), and solvent (2.0 mL) under the Ar at 0 °C for 12 h, isolated yields, NR = No reaction, ND=Not detected.

**Table S3. Screening of [Ru] catalyst <sup>a</sup>**

$\text{1a} + 2 \text{ 2a} \xrightarrow[\text{NMP, Ar, 0 } ^\circ\text{C, 12 h}]{\text{Mg (2.0 equiv.)}, \text{Ru Catalyst (5 mol\%)}}$ 
 $\text{3aa}$

| Entry    | Ru Catalyst (5 mol%)                                      | Yield (%) |
|----------|-----------------------------------------------------------|-----------|
| <b>1</b> | <b>Cp*Ru(cod)Cl</b>                                       | <b>61</b> |
| 2        | [Ru( <i>p</i> -cymene)] <sub>2</sub> Cl <sub>2</sub>      | 32        |
| 3        | CpRu(PPh <sub>3</sub> ) <sub>2</sub> Cl                   | 41        |
| 4        | [Ru(bpy) <sub>3</sub> ]Cl <sub>2</sub> ·6H <sub>2</sub> O | 46        |
| 5        | Ru(PPh <sub>3</sub> ) <sub>3</sub> Cl <sub>2</sub>        | 45        |
| 6        | RuCl <sub>3</sub> ·xH <sub>2</sub> O                      | 41        |
| 7        | (PPh <sub>3</sub> ) <sub>3</sub> Ru(CO)(Cl)H              | 39        |
| 8        | Cp*Ru(PPh <sub>3</sub> ) <sub>2</sub> Cl                  | 54        |

<sup>a</sup> Reaction condition: **1a** (38.0 mg, 0.2 mmol), **2a** (118.2 mg, 0.6 mmol), Mg (0.4 mmol, 2.0 equiv.), [Ru] catalyst (0.01 mmol, 5 mol%), and NMP (2.0 mL) under the Ar at 0 °C for 12 h, isolated yields.

**Table S4. Screening of the loading <sup>a</sup>**

$\text{1a} + 2 \text{ 2a} \xrightarrow[\text{NMP, Ar, 0 } ^\circ\text{C, 12 h}]{\text{Mg (x equiv.)}, \text{Cp}^*\text{Ru(cod)Cl (x mol\%)}}$ 
 $\text{3aa}$

| Entry    | Cp*Ru(cod)Cl (x mol%) | Mg (x equiv.) | Yield (%) |
|----------|-----------------------|---------------|-----------|
| 1        | 1.0                   | 2.0           | 50        |
| 2        | 2.5                   | 2.0           | 58        |
| <b>3</b> | <b>5.0</b>            | <b>2.0</b>    | <b>61</b> |
| 4        | 7.5                   | 2.0           | 60        |
| 5        | 10                    | 2.0           | 61        |
| 6        | 5.0                   | 1.0           | 43        |
| 7        | 5.0                   | 1.5           | 42        |
| 8        | 5.0                   | 2.0           | 63        |
| <b>9</b> | <b>5.0</b>            | <b>2.5</b>    | <b>69</b> |
| 10       | 5.0                   | 3.0           | 65        |

<sup>a</sup> Reaction condition: **1a** (38.0 mg, 0.2 mmol), **2a** (118.2 mg, 0.6 mmol), Mg (x mmol, x equiv.), Cp\*Ru(cod)Cl (x mmol, x mol%), and NMP (2.0 mL) under the Ar at 0 °C for 12 h, isolated yields.

**Table S5. Screening of temperature <sup>a</sup>**

$\text{1a} + 2 \text{ 2a} \xrightarrow[\text{NMP, Ar, T } ^\circ\text{C, 12 h}]{\text{Mg (2.5 equiv.)}, \text{Cp}^*\text{Ru(cod)Cl (5 mol\%)}}$ 
 $\text{3aa}$

| Entry    | T (°C)   | Yield (%) |
|----------|----------|-----------|
| 1        | r.t.     | 56        |
| <b>2</b> | <b>0</b> | <b>69</b> |
| 3        | -10      | 60        |
| 4        | -20      | 53        |

<sup>a</sup> Reaction condition: **1a** (38.0 mg, 0.2 mmol), **2a** (118.2 mg, 0.6 mmol), Mg (0.5 mmol, 2.5 equiv.), Cp\*Ru(cod)Cl (0.01 mmol, 5 mol%), and NMP (2.0 mL) under the Ar at T °C for 12 h, isolated yields.

**Table S6. Screening of time <sup>a</sup>**

| 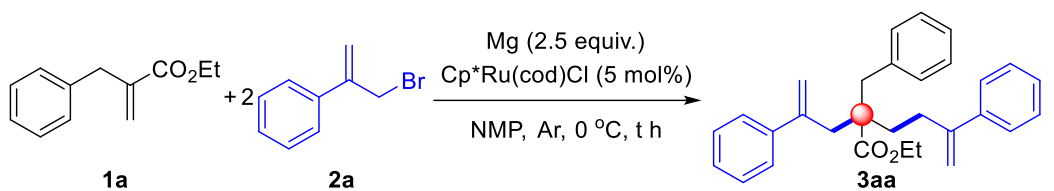 |           |           |
|------------------------------------------------------------------------------------|-----------|-----------|
| Entry                                                                              | t (h)     | Yield (%) |
| 1                                                                                  | 6         | 57        |
| <b>2</b>                                                                           | <b>12</b> | <b>69</b> |
| 3                                                                                  | 18        | 66        |
| 4                                                                                  | 24        | 62        |

<sup>a</sup> Reaction condition: **1a** (38.0 mg, 0.2 mmol), **2a** (118.2 mg, 0.6 mmol), Mg (0.5 mmol, 2.5 equiv.), Cp\*Ru(cod)Cl (0.01 mmol, 5 mol%), and NMP (2.0 mL) under the Ar at 0 °C for t h, isolated yields.

**Table S7. Screening loading of 2a <sup>a</sup>**

| 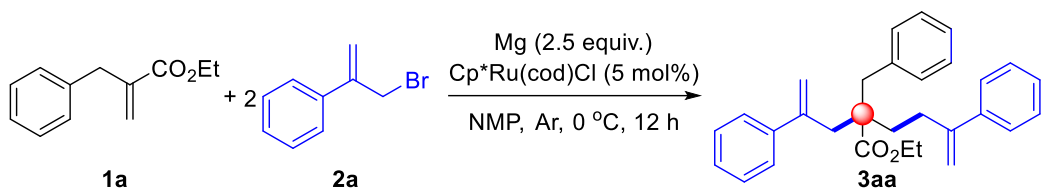 |                      |           |
|-------------------------------------------------------------------------------------|----------------------|-----------|
| Entry                                                                               | <b>2a</b> (x equiv.) | Yield (%) |
| 1                                                                                   | 2.0                  | 48        |
| 2                                                                                   | 2.5                  | 66        |
| <b>3</b>                                                                            | <b>3.0</b>           | <b>69</b> |
| 4                                                                                   | 3.5                  | 69        |
| 5                                                                                   | 4.0                  | 64        |

<sup>a</sup> Reaction condition: **1a** (38.0 mg, 0.2 mmol), **2a** (x mg, x mmol), Mg (0.5 mmol, 2.5 equiv.), Cp\*Ru(cod)Cl (0.01 mmol, 5 mol%), and NMP (2.0 mL) under the Ar at 0 °C for 12 h, isolated yields.

**Table S8. Control experiment <sup>a</sup>**

| 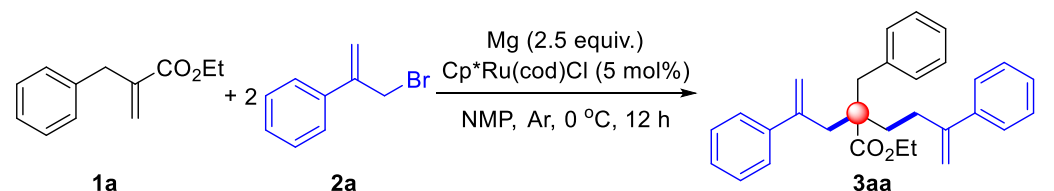 |                                      |           |
|--------------------------------------------------------------------------------------|--------------------------------------|-----------|
| Entry                                                                                | Deviation from “standard” conditions | Yield (%) |
| 1                                                                                    | No Cp*Ru(cod)Cl                      | 41        |
| 2                                                                                    | No Mg                                | NR        |

<sup>a</sup> Reaction condition: **1a** (38.0 mg, 0.2 mmol), **2a** (118.2 mg, 0.6 mmol), Mg (0.4 mmol, 2.0 equiv.), Cp\*Ru(cod)Cl (0.01 mmol, 5 mol%), and NMP (2.0 mL) under the Ar at 0 °C for 12 h, isolated yields.

NR = No Reaction.

### 3. General procedure

Electron-deficient olefins **1** (0.20 mmol), allyl bromides **2** (0.60 mmol), Cp\*Ru(cod)Cl (0.01 mmol, 5.0 mol%), Mg (0.5 mmol, 2.5 equiv.) and NMP (2.0 mL) were added to a flame-dried Young-type tube. The mixture was stirred under Ar at 0 °C for 12 h. After rising to room temperature, the reaction mixture was treated with saturated NH<sub>4</sub>Cl<sub>(aq.)</sub> (25 mL), extracted with ethyl acetate (3 x 10 mL), washed with saturated NaCl<sub>(aq.)</sub> (3 x 10 mL), and dried over Na<sub>2</sub>SO<sub>4</sub>. Then, the solvent (ethyl acetate) was removed in vacuo and the residue was purified by flash column chromatography on silica gel and eluted with ethyl acetate/petroleum ether (1/40-1/200) to afford the desired products **3**.

### 4. Experimental characterization data for products

#### Ethyl 2-benzyl-5-phenyl-2-(2-phenylallyl)hex-5-enoate (**3aa**):

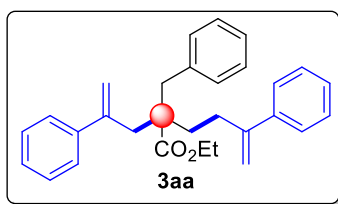

The title compound was prepared according to the general procedure and purified by column chromatography to give a yellowish oil (58.6 mg, 69% yield). <sup>1</sup>H NMR (500 MHz, CDCl<sub>3</sub>) δ 7.31-7.18 (m, 13H), 7.08-7.06 (m, 2H), 5.24 (d, *J* = 1.0 Hz 1H), 5.16 (s, 1H), 5.12 (s, 1H), 4.85 (s, 1H), 3.78 (q, *J* = 7.0 Hz, 2H), 3.12 (d, *J* = 14.0 Hz, 1H), 2.94-2.91 (m, 2H), 2.81 (d, *J* = 15.0 Hz, 1H), 2.46-2.42 (m, 2H), 1.68-1.64 (m, 2H), 1.11 (t, *J* = 7.0 Hz, 3H). <sup>13</sup>C NMR (126 MHz, CDCl<sub>3</sub>) δ 175.67, 148.33, 145.88, 142.87, 141.30, 137.54, 130.15, 128.18, 128.13, 128.09, 127.32, 127.28, 126.79, 126.44, 126.15, 117.26, 112.22, 60.36, 50.42, 41.56, 41.03, 32.20, 29.85, 13.98. HRMS (ESI) *m/z*: [M+H]<sup>+</sup> calcd for C<sub>30</sub>H<sub>33</sub>O<sub>2</sub><sup>+</sup> 425.2475; found 425.2470.

#### Ethyl 2-(4-methylbenzyl)-5-phenyl-2-(2-phenylallyl)hex-5-enoate (**3ba**):

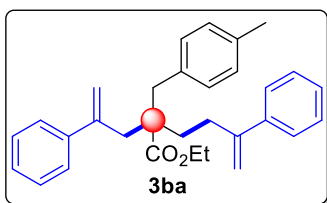

The title compound was prepared according to the general procedure and purified by column chromatography to give a yellowish solid (52.5 mg, 60% yield). <sup>1</sup>H NMR (600 MHz, CDCl<sub>3</sub>) δ 7.31-7.23 (m, 11H), 7.01 (d, *J* = 7.8 Hz,

2H), 6.97 (d,  $J = 7.8$  Hz, 2H), 5.24 (s, 1H), 5.16 (s, 1H), 5.11 (s, 1H), 4.86 (s, 1H), 3.77 (q,  $J = 7.2$  Hz, 2H), 3.08 (d,  $J = 13.8$  Hz, 1H), 2.94-2.88 (m, 2H), 2.79 (d,  $J = 14.4$  Hz, 1H), 2.49-2.40 (m, 2H), 2.29 (s, 3H), 1.66 (t,  $J = 8.4$  Hz, 2H), 1.12 (t,  $J = 7.2$  Hz, 3H).  $^{13}\text{C}$  NMR (126 MHz,  $\text{CDCl}_3$ )  $\delta$  175.73, 148.37, 145.92, 142.91, 141.34, 135.89, 134.34, 130.01, 128.79, 128.15, 128.10, 127.28, 127.25, 126.79, 126.16, 117.17, 112.17, 60.30, 50.41, 41.53, 40.54, 32.14, 29.82, 21.01, 13.98. HRMS (ESI)  $m/z$ :  $[\text{M}+\text{H}]^+$  calcd for  $\text{C}_{31}\text{H}_{35}\text{O}_2^+$  439.2632; found 439.2634.

**Ethyl 2-(4-methoxybenzyl)-5-phenyl-2-(2-phenylallyl)hex-5-enoate (3ca):**

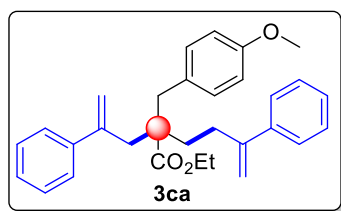

The title compound was prepared according to the general procedure and purified by column chromatography to give a yellowish solid (42.5 mg, 47% yield).  $^1\text{H}$  NMR (500 MHz,  $\text{CDCl}_3$ )  $\delta$  7.31-7.22 (m, 10H), 6.99-6.97 (m, 2H), 6.74-6.72 (m, 2H), 5.24 (d,  $J = 1.5$  Hz, 1H), 5.16 (d,  $J = 1.0$  Hz, 1H), 5.11 (d,  $J = 1.0$  Hz, 1H), 4.86 (d,  $J = 1.0$  Hz, 1H), 3.78-3.74 (m, 5H), 3.05 (d,  $J = 13.5$  Hz, 1H), 2.93-2.85 (m, 2H), 2.79 (d,  $J = 14.5$  Hz, 1H), 2.49-2.39 (m, 2H), 1.66-1.63 (m, 2H), 1.12 (t,  $J = 7.5$  Hz, 3H).  $^{13}\text{C}$  NMR (126 MHz,  $\text{CDCl}_3$ )  $\delta$  175.85, 158.34, 148.51, 146.05, 143.01, 141.47, 131.20, 129.59, 128.28, 128.22, 127.41, 127.39, 126.90, 126.29, 117.27, 113.61, 112.31, 60.42, 55.31, 50.60, 41.61, 40.22, 32.20, 29.95, 14.12. HRMS (ESI)  $m/z$ :  $[\text{M}+\text{H}]^+$  calcd for  $\text{C}_{31}\text{H}_{35}\text{O}_3^+$  455.2581; found 455.2591.

**Ethyl 2-(4-(tert-butyl)benzyl)-5-phenyl-2-(2-phenylallyl)hex-5-enoate (3da):**

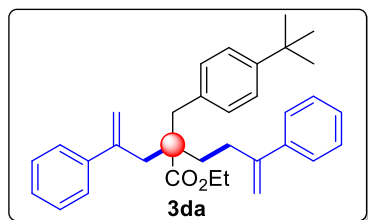

The title compound was prepared according to the general procedure and purified by column chromatography to give a yellowish oil (55.1 mg, 57% yield).  $^1\text{H}$  NMR (500 MHz,  $\text{CDCl}_3$ )  $\delta$  7.31-7.21 (m, 12H), 7.01 (d,  $J = 8.5$  Hz, 2H), 5.24 (d,  $J = 1.0$  Hz, 1H), 5.16 (d,  $J = 1.0$  Hz, 1H), 5.12 (d,  $J = 0.5$  Hz, 1H), 4.85 (d,  $J = 1.0$  Hz, 1H), 3.78 (q,  $J = 7.0$  Hz, 2H), 3.08 (d,  $J = 14.0$  Hz, 1H), 2.95-2.87 (m, 2H), 2.81 (d,  $J = 14.5$  Hz, 1H), 2.45-2.42 (m, 2H), 1.69-1.65 (m, 2H), 1.28 (s, 9H), 1.11 (t,  $J = 7.0$  Hz, 3H).  $^{13}\text{C}$  NMR (126 MHz,  $\text{CDCl}_3$ )  $\delta$  175.87,

149.32, 148.51, 146.06, 143.06, 141.43, 134.52, 129.91, 128.26, 128.22, 127.39, 127.36, 126.93, 126.28, 125.08, 117.35, 112.29, 60.41, 50.56, 41.62, 40.71, 34.48, 32.36, 31.51, 29.98, 14.08. HRMS (ESI)  $m/z$ :  $[M+H]^+$  calcd for  $C_{34}H_{41}O_2^+$  481.3101; found 481.3101.

### Ethyl 2-phenethyl-5-phenyl-2-(2-phenylallyl)hex-5-enoate (3ea):

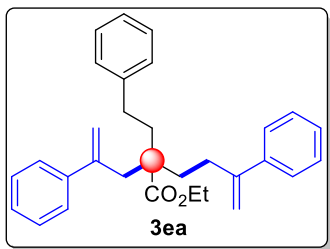

The title compound was prepared according to the general procedure and purified by column chromatography to give a yellowish oil (55.3 mg, 63% yield).  $^1H$  NMR (500 MHz,  $CDCl_3$ )  $\delta$  7.33-7.21 (m, 12H), 7.16-7.13 (m, 1H), 6.97 (d,  $J$  = 7.0 Hz, 2H), 5.21-5.20 (m, 2H), 5.12 (s, 1H), 4.92 (s, 1H),

3.82-3.78 (m, 2H), 2.94 (q,  $J$  = 14.0 Hz, 2H), 2.39-2.32 (m, 4H), 1.91-1.78 (m, 3H), 1.73-1.67 (m, 1H), 1.17 (t,  $J$  = 7.5 Hz, 3H).  $^{13}C$  NMR (126 MHz,  $CDCl_3$ )  $\delta$  175.96, 148.41, 146.25, 143.01, 142.25, 141.25, 128.45, 128.41, 128.39, 128.30, 127.54, 127.45, 127.04, 126.23, 125.94, 117.90, 112.52, 60.42, 49.79, 40.43, 36.03, 34.00, 30.56, 30.18, 14.28. HRMS (ESI)  $m/z$ :  $[M+H]^+$  calcd for  $C_{31}H_{35}O_2^+$  439.2632; found 439.2612.

### Ethyl 2-(3,5-difluorobenzyl)-5-phenyl-2-(2-phenylallyl)hex-5-enoate (3ga):

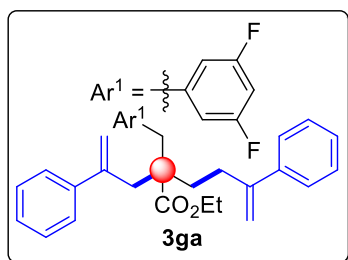

The title compound was prepared according to the general procedure and purified by column chromatography to give a yellowish oil (45.6 mg, 50% yield).  $^1H$  NMR (500 MHz,  $CDCl_3$ )  $\delta$  7.29-7.24 (m, 10H), 6.64-6.58 (m, 3H), 5.25 (d,  $J$  = 1.0 Hz, 1H), 5.17 (d,  $J$  =

1.0 Hz, 1H), 5.11 (d,  $J$  = 1.0 Hz, 1H), 4.87 (d,  $J$  = 1.0 Hz, 1H), 3.82-3.77 (m, 2H), 3.06 (d,  $J$  = 14.5 Hz, 1H), 2.91-2.81 (m, 3H), 2.43-2.39 (m, 2H), 1.67-1.63 (m, 2H), 1.14 (t,  $J$  = 7.0 Hz, 3H).  $^{13}C$  NMR (126 MHz,  $CDCl_3$ )  $\delta$  175.30, 163.84 (d,  $J$  = 13.0 Hz), 161.87 (d,  $J$  = 13.0 Hz), 148.23, 145.75, 142.74, 141.68 (t,  $J$  = 9.1 Hz), 141.25, 128.38, 128.33, 127.60, 127.55, 126.90, 126.24, 117.80, 113.16 (d,  $J$  = 5.5 Hz), 113.00 (d,  $J$  = 5.7 Hz), 112.62, 102.32 (t,  $J$  = 25.3 Hz), 60.77, 50.57, 41.66, 40.84, 32.68, 30.05, 14.09. HRMS

(ESI)  $m/z$ :  $[M+Na]^+$  calcd for  $C_{30}H_{30}NaO_2^+$  483.2106; found 483.2112.

**Ethyl 2-(2,5-dimethylbenzyl)-5-phenyl-2-(2-phenylallyl)hex-5-enoate (3ha):**

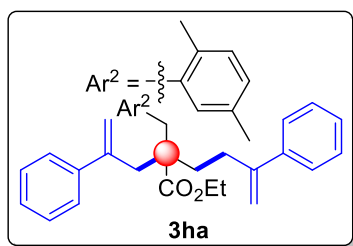

The title compound was prepared according to the general procedure and purified by column chromatography to give a yellowish solid (45.2 mg, 50% yield).  $^1H$  NMR (500 MHz,  $CDCl_3$ )  $\delta$  7.31-7.21 (m, 8H), 7.15-7.13 (m, 2H), 6.99 (d,  $J = 7.5$  Hz, 1H), 6.90 (d,  $J =$

7.5 Hz, 1H), 6.80 (s, 1H), 5.24 (d,  $J = 1.5$  Hz, 1H), 5.14 (d,  $J = 1.0$  Hz, 1H), 5.06 (d,  $J = 1.0$  Hz, 1H), 4.78 (d,  $J = 1.0$  Hz, 1H), 3.88-3.80 (m, 2H), 3.07 (d,  $J = 14.0$  Hz, 1H), 2.95-2.91 (m, 2H), 2.86 (d,  $J = 15.0$  Hz, 1H), 2.36-2.31 (m, 2H), 2.19 (s, 3H), 2.13 (s, 3H), 1.77-1.71 (m, 2H), 1.10 (t,  $J = 7.0$  Hz, 3H).  $^{13}C$  NMR (126 MHz,  $CDCl_3$ )  $\delta$  176.35, 148.45, 146.06, 143.15, 141.21, 136.19, 134.91, 133.92, 130.40, 130.10, 128.29, 128.27, 127.40, 127.33, 126.92, 126.82, 126.15, 117.81, 112.14, 60.53, 50.22, 40.96, 38.37, 33.05, 30.04, 21.14, 19.84, 14.02. HRMS (ESI)  $m/z$ :  $[M+H]^+$  calcd for  $C_{32}H_{37}O_2^+$  453.2788; found 453.2789.

**Tert-butyl 2-benzyl-5-phenyl-2-(2-phenylallyl)hex-5-enoate (3ia):**

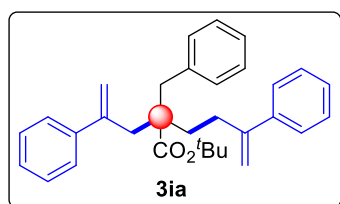

The title compound was prepared according to the general procedure and purified by column chromatography to give a colorless oil (40.5 mg, 45% yield).  $^1H$  NMR (500 MHz,  $CDCl_3$ )  $\delta$  7.32-7.23 (m, 10H), 7.18-7.16 (m, 3H),

7.10-7.08 (m, 2H), 5.30 (s, 1H), 5.16 (d,  $J = 1.0$  Hz, 1H), 5.14 (d,  $J = 1.0$  Hz, 1H), 4.84 (d,  $J = 1.0$  Hz, 1H), 3.01 (s, 2H), 2.79 (q,  $J = 15.5$  Hz, 2H), 2.51-2.39 (m, 2H), 1.66-1.59 (m, 2H), 1.38 (s, 9H).  $^{13}C$  NMR (126 MHz,  $CDCl_3$ )  $\delta$  175.27, 148.56, 145.92, 143.72, 141.54, 137.93, 130.46, 128.37, 128.29, 128.09, 127.40, 127.39, 126.65, 126.41, 126.29, 116.54, 112.27, 80.95, 50.53, 40.63, 40.33, 34.10, 30.20, 28.13. HRMS (ESI)  $m/z$ :  $[M+Na]^+$  calcd for  $C_{32}H_{36}NaO_2^+$  475.2608; found 475.2607.

**Ethyl 2,5-diphenyl-2-(2-phenylallyl)hex-5-enoate (3ja):**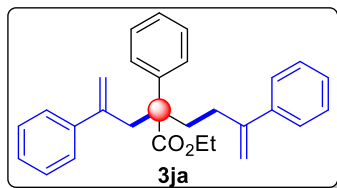

The title compound was prepared according to the general procedure and purified by column chromatography to give a yellowish oil (43.1 mg, 53% yield).  $^1\text{H}$  NMR (500 MHz,  $\text{CDCl}_3$ )  $\delta$  7.25-7.12 (m, 15H), 5.12 (d,  $J$  = 4.5 Hz, 2H),

4.84 (s, 1H), 4.69 (s, 1H), 3.98-3.92 (m, 1H), 3.83-3.76 (m, 1H), 3.43 (d,  $J$  = 13.5 Hz, 1H), 3.24 (d,  $J$  = 13.5 Hz, 1H), 2.22-2.10 (m, 2H), 2.07-2.01 (m, 2H), 1.07 (t,  $J$  = 7.0 Hz, 3H).  $^{13}\text{C}$  NMR (151 MHz,  $\text{CDCl}_3$ )  $\delta$  175.29, 147.99, 145.50, 142.90, 142.57, 140.77, 128.21, 128.10, 127.33, 127.18, 126.90, 126.70, 126.64, 126.03, 118.37, 112.29, 60.75, 54.49, 40.00, 33.48, 30.10, 13.98. HRMS (ESI)  $m/z$ :  $[\text{M}+\text{Na}]^+$  calcd for  $\text{C}_{29}\text{H}_{30}\text{NaO}_2^+$  433.2138; found 433.2137.

**Ethyl 5-phenyl-2-(2-phenylallyl)-2-(*o*-tolyl)hex-5-enoate (3ka):**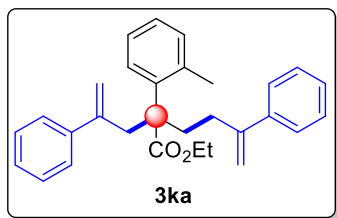

The title compound was prepared according to the general procedure and purified by column chromatography to give a yellowish oil (50.0 mg, 59% yield).  $^1\text{H}$  NMR (600 MHz,  $\text{CDCl}_3$ )  $\delta$  7.24-7.00 (m, 14H), 5.10 (d,  $J$  = 8.4 Hz, 2H),

4.75 (s, 1H), 4.68 (s, 1H), 4.03-3.97 (m, 1H), 3.85-3.80 (m, 1H), 3.34-3.29 (m, 2H), 2.18-2.17 (m, 1H), 2.13 (s, 3H), 2.02-1.99 (m, 2H), 1.33-1.28 (m, 1H), 1.13 (t,  $J$  = 7.2 Hz, 3H).  $^{13}\text{C}$  NMR (151 MHz,  $\text{CDCl}_3$ )  $\delta$  176.15, 147.89, 145.52, 142.92, 140.85, 140.39, 136.04, 131.82, 128.26, 128.06, 127.39, 127.20, 127.08, 126.73, 126.04, 125.49, 118.80, 112.39, 60.91, 53.77, 38.66, 32.77, 30.16, 20.46, 14.17. HRMS (ESI)  $m/z$ :  $[\text{M}+\text{Na}]^+$  calcd for  $\text{C}_{30}\text{H}_{32}\text{NaO}_2^+$  447.2295; found 447.2291.

**Ethyl 5-phenyl-2-(2-phenylallyl)-2-(*m*-tolyl)hex-5-enoate (3la):**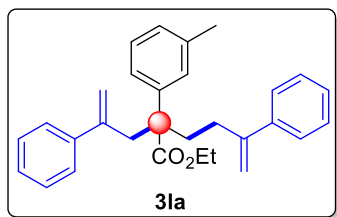

The title compound was prepared according to the general procedure and purified by column chromatography to give a yellowish oil (33.2 mg, 40% yield).  $^1\text{H}$  NMR (600 MHz,  $\text{CDCl}_3$ )  $\delta$  7.25-7.12 (m, 11H), 6.98-6.93 (m, 3H), 5.13-

5.12 (m, 2H), 4.89 (s, 1H), 4.69 (s, 1H), 3.98-3.93 (m, 1H), 3.82-3.77 (m, 1H), 3.41 (d,

$J = 13.2$  Hz, 1H), 3.24 (d,  $J = 13.2$  Hz, 1H), 2.27 (s, 3H), 2.21-2.10 (m, 2H), 2.03-2.00 (m, 2H), 1.09 (t,  $J = 7.2$  Hz, 3H).  $^{13}\text{C}$  NMR (151 MHz,  $\text{CDCl}_3$ )  $\delta$  175.45, 148.08, 145.71, 142.96, 142.47, 140.80, 137.70, 128.24, 128.10, 128.06, 127.48, 127.39, 127.36, 127.17, 126.91, 126.08, 123.70, 118.30, 112.33, 60.76, 54.36, 39.98, 33.47, 30.12, 21.71, 14.02. HRMS (ESI)  $m/z$ :  $[\text{M}+\text{Na}]^+$  calcd for  $\text{C}_{30}\text{H}_{32}\text{NaO}_2^+$  447.2295; found 447.2291.

**Ethyl 5-phenyl-2-(2-phenylallyl)-2-(*p*-tolyl)hex-5-enoate (3ma):**

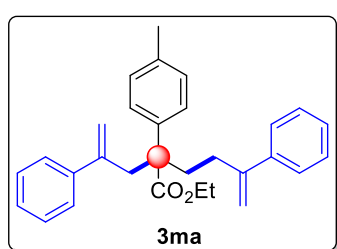

The title compound was prepared according to the general procedure and purified by column chromatography to give a yellowish oil (37.3 mg, 45% yield).  $^1\text{H}$  NMR (600 MHz,  $\text{CDCl}_3$ )  $\delta$  7.25-7.19 (m, 8H), 7.15-7.13 (m, 2H), 7.05 (s, 4H), 5.12-5.11 (m, 2H), 4.84 (s, 1H), 4.67 (s, 1H), 3.97-

3.92 (m, 1H), 3.81-3.76 (m, 1H), 3.41 (d,  $J = 13.2$  Hz, 1H), 3.21 (d,  $J = 13.8$  Hz, 1H), 2.30 (s, 3H), 2.19-2.10 (m, 2H), 2.03-1.99 (m, 2H), 1.09 (t,  $J = 7.2$  Hz, 3H).  $^{13}\text{C}$  NMR (151 MHz,  $\text{CDCl}_3$ )  $\delta$  175.50, 148.10, 145.62, 143.02, 140.89, 139.57, 136.24, 128.94, 128.23, 128.11, 127.34, 127.14, 126.96, 126.54, 126.09, 118.32, 112.25, 60.76, 54.18, 40.12, 33.53, 30.13, 21.08, 14.04. HRMS (ESI)  $m/z$ :  $[\text{M}+\text{Na}]^+$  calcd for  $\text{C}_{30}\text{H}_{32}\text{NaO}_2^+$  447.2295; found 447.2291.

**Ethyl 2-(4-methoxyphenyl)-5-phenyl-2-(2-phenylallyl)hex-5-enoate (3na):**

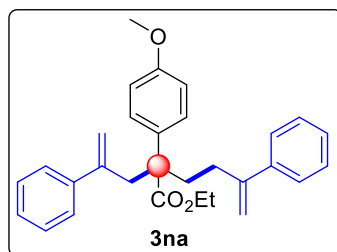

The title compound was prepared according to the general procedure and purified by column chromatography to give a yellowish oil (40.2 mg, 46% yield).  $^1\text{H}$  NMR (600 MHz,  $\text{CDCl}_3$ )  $\delta$  7.24-7.15 (m, 10H), 7.08 (d,  $J = 8.4$  Hz, 2H), 6.78 (d,  $J = 9.0$  Hz, 2H), 5.12 (d,  $J = 4.2$  Hz, 2H),

4.85 (s, 1H), 4.69 (s, 1H), 3.98-3.92 (m, 1H), 3.82-3.80 (m, 1H), 3.77 (s, 3H), 3.40 (d,  $J = 13.8$  Hz, 1H), 3.20 (d,  $J = 13.8$  Hz, 1H), 2.20-2.11 (m, 2H), 2.03-1.98 (m, 2H), 1.09 (t,  $J = 7.2$  Hz, 3H).  $^{13}\text{C}$  NMR (151 MHz,  $\text{CDCl}_3$ )  $\delta$  175.64, 158.26, 148.21, 145.73, 143.10, 140.98, 134.77, 128.35, 128.22, 127.84, 127.47, 127.26, 127.04, 126.20,

118.42, 113.64, 112.40, 60.87, 55.43, 53.91, 40.32, 33.67, 30.28, 14.16. HRMS (ESI)  $m/z$ :  $[M+H]^+$  calcd for  $C_{30}H_{33}O_2^+$  441.2424; found 441.2421.

**Ethyl 2-(naphthalen-1-yl)-5-phenyl-2-(2-phenylallyl)hex-5-enoate (3oa):**

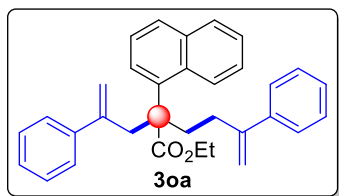

The title compound was prepared according to the general procedure and purified by column chromatography to give a yellowish oil (50.2 mg, 55% yield).  $^1H$  NMR (500 MHz,  $CDCl_3$ )  $\delta$  7.94 (d,  $J$  = 8.5 Hz, 1H), 7.79-7.78 (m, 1H),

7.64-7.63 (m, 1H), 7.42-7.38 (m, 2H), 7.27 (d,  $J$  = 5.5 Hz, 2H), 7.16 (d,  $J$  = 7.0 Hz, 3H), 7.06-7.05 (m, 7H), 5.12 (s, 1H), 5.05 (s, 1H), 4.71 (s, 1H), 4.67 (s, 1H), 3.99-3.92 (m, 1H), 3.84-3.82 (m, 1H), 3.62 (d,  $J$  = 13.5 Hz, 1H), 3.52 (d,  $J$  = 13.5 Hz, 1H), 2.29 (d,  $J$  = 10.5 Hz, 2H), 2.18-2.15 (m, 2H), 0.95 (t,  $J$  = 7.0 Hz, 3H).  $^{13}C$  NMR (126 MHz,  $CDCl_3$ )  $\delta$  176.86, 147.89, 145.63, 142.59, 140.81, 138.19, 134.37, 131.53, 129.46, 128.24, 128.18, 127.85, 127.35, 126.97, 126.60, 126.03, 125.90, 125.08, 125.07, 124.79, 123.95, 118.65, 112.49, 61.00, 53.63, 39.23, 33.67, 30.25, 14.00. HRMS (ESI)  $m/z$ :  $[M+H]^+$  calcd for  $C_{33}H_{33}O_2^+$  461.2475; found 461.2474.

**Ethyl 2-(4-fluorophenyl)-5-phenyl-2-(2-phenylallyl)hex-5-enoate (3pa):**

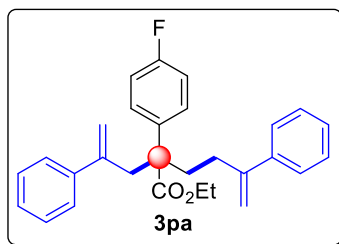

The title compound was prepared according to the general procedure and purified by column chromatography to give a yellowish oil (17.4 mg, 20% yield).  $^1H$  NMR (600 MHz,  $CDCl_3$ )  $\delta$  7.26-7.16 (m, 10H), 7.11-7.09 (m, 2H),

6.92-6.89 (m, 2H), 5.13-5.12 (m, 2H), 4.84 (s, 1H), 4.71 (s, 1H), 4.0-3.95 (m, 1H), 3.86-3.81 (m, 1H), 3.39 (d,  $J$  = 13.8 Hz, 1H), 3.21 (d,  $J$  = 13.8 Hz, 1H), 2.23-2.13 (m, 2H), 2.06-1.97 (m, 2H), 1.10 (t,  $J$  = 7.2 Hz, 3H).  $^{13}C$  NMR (151 MHz,  $CDCl_3$ )  $\delta$  175.19, 162.34 (d,  $J$  = 245.5 Hz), 147.93, 145.41, 142.74, 140.78, 138.30 (d,  $J$  = 3.2 Hz), 128.36, 128.31, 128.14, 127.47, 127.24, 126.88, 126.08, 118.51, 115.04 (d,  $J$  = 21.1 Hz), 112.49, 60.95, 53.98, 40.41, 33.54, 30.21, 14.04. HRMS (ESI)  $m/z$ :  $[M+Na]^+$  calcd for  $C_{29}H_{29}FNaO_2^+$  451.2044; found 451.2047.

### Ethyl 2-(4-chlorophenyl)-5-phenyl-2-(2-phenylallyl)hex-5-enoate (3qa):

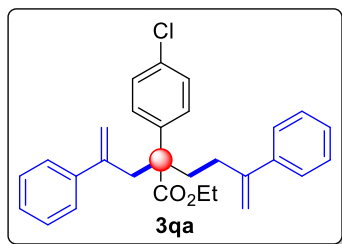

The title compound was prepared according to the general procedure and purified by column chromatography to give a yellowish oil (19.1 mg, 21% yield).  $^1\text{H}$  NMR (500 MHz,  $\text{CDCl}_3$ )  $\delta$  7.26-7.15 (m, 12H), 7.07 (d,  $J$  = 8.5 Hz, 2H), 5.13-5.12 (m, 2H), 4.85 (s, 1H), 4.72 (s, 1H), 4.0-

3.94 (m, 1H), 3.87-3.81 (m, 1H), 3.38 (d,  $J$  = 13.5 Hz, 1H), 3.21 (d,  $J$  = 14.0 Hz, 1H), 2.23-2.12 (m, 2H), 2.06-1.96 (m, 2H), 1.10 (t,  $J$  = 7.0 Hz, 3H).  $^{13}\text{C}$  NMR (126 MHz,  $\text{CDCl}_3$ )  $\delta$  174.95, 148.00, 145.38, 142.73, 141.12, 140.89, 132.59, 128.33, 128.31, 128.26, 128.17, 127.49, 127.25, 126.91, 126.12, 118.53, 112.51, 61.01, 54.21, 40.50, 33.56, 30.27, 14.04. HRMS (ESI)  $m/z$ :  $[\text{M}+\text{H}]^+$  calcd for  $\text{C}_{29}\text{H}_{30}\text{ClO}_2^+$  445.1929; found 445.1927.

### *N*,2,5-Triphenyl-2-(2-phenylallyl)hex-5-enamide (3sa)

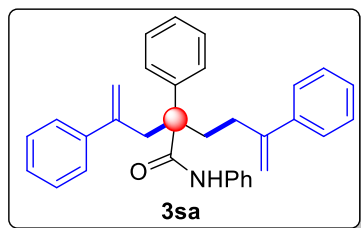

The title compound was prepared according to the general procedure and purified by column chromatography to give a white solid (16.7 mg, 18% yield).  $^1\text{H}$  NMR (600 MHz,  $\text{CDCl}_3$ )  $\delta$  7.30-7.27 (m, 4H), 7.25-7.13 (m, 15H), 7.07 (t,  $J$  = 7.2 Hz, 1H), 6.67 (s, 1H),

5.10 (d,  $J$  = 20.4 Hz, 2H), 4.67 (d,  $J$  = 6.0 Hz, 2H), 3.53 (d,  $J$  = 13.8 Hz, 1H), 3.25 (d,  $J$  = 13.8 Hz, 1H), 2.40-2.30 (m, 2H), 2.14-2.09 (m, 1H), 1.91-1.86 (m, 1H).  $^{13}\text{C}$  NMR (151 MHz,  $\text{CDCl}_3$ )  $\delta$  173.99, 147.82, 145.43, 143.19, 142.57, 140.64, 137.90, 129.00, 128.62, 128.37, 128.19, 127.73, 127.46, 127.43, 127.06, 126.78, 126.12, 124.28, 119.86, 118.54, 112.69, 55.99, 40.38, 33.89, 30.30. HRMS (ESI)  $m/z$ :  $[\text{M}+\text{H}]^+$  calcd for  $\text{C}_{33}\text{H}_{32}\text{NO}^+$  458.2478; found 458.2479.

### Dimethyl (2,4,7-triphenylocta-1,7-dien-4-yl)phosphonate (3ta)

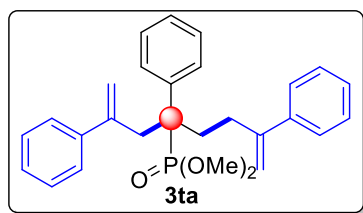

The title compound was prepared according to the general procedure and purified by column chromatography to give a yellowish oil (26.9 mg, 30% yield).  $^1\text{H}$  NMR (600 MHz,  $\text{CDCl}_3$ )  $\delta$  7.48 (d,  $J$  = 7.8 Hz, 2H), 7.32-7.28 (m, 5H), 7.25-7.17 (m, 8H), 5.19 (s, 1H), 5.14 (s, 1H), 4.88 (s, 1H),

4.73 (s, 1H), 3.60 (d,  $J = 10.2$  Hz, 3H), 3.49 (d,  $J = 10.2$  Hz, 3H), 3.40 (t,  $J = 15$  Hz, 1H), 3.32 (dd,  $J = 15, 8.4$  Hz, 1H), 2.69-2.64 (m, 1H), 2.55-2.49 (m, 1H), 2.33-2.24 (m, 1H), 2.12-2.06 (m, 1H).  $^{13}\text{C}$  NMR (151 MHz,  $\text{CDCl}_3$ )  $\delta$  148.82, 143.96 (d,  $J = 14.3$  Hz), 143.36, 141.26, 138.45 (d,  $J = 5.7$  Hz), 128.85 (d,  $J = 5.9$  Hz), 128.31 (d,  $J = 10.9$  Hz), 128.06 (d,  $J = 2.3$  Hz), 127.46, 127.22, 126.89 (d,  $J = 2.7$  Hz), 126.58, 126.32, 118.04, 112.20, 53.81 (d,  $J = 7.675$  Hz), 52.94 (d,  $J = 7.7$  Hz), 48.38, 47.50, 38.71, 31.94 (d,  $J = 3.8$  Hz), 30.54 (d,  $J = 3.5$  Hz).  $^{31}\text{P}$  NMR (243 MHz,  $\text{CDCl}_3$ )  $\delta$  32.94 (s, 1P). HRMS (ESI)  $m/z$ :  $[\text{M}+\text{H}]^+$  calcd for  $\text{C}_{28}\text{H}_{32}\text{O}_3\text{P}^+$  447.2084; found 447.2082.

### Ethyl 2-benzyl-5-(2-methoxyphenyl)-2-(2-(2-methoxyphenyl)allyl)hex-5-enoate

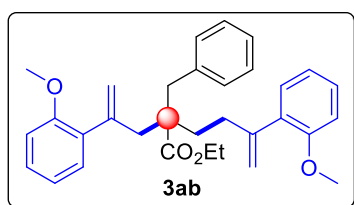

**(3ab):** The title compound was prepared according to the general procedure and purified by column chromatography to give a yellowish oil (48.7 mg, 50% yield).  $^1\text{H}$  NMR (500 MHz,  $\text{CDCl}_3$ ) 7.24-7.17 (m, 7H),

7.09-7.07 (m, 2H), 6.82-6.78 (m, 4H), 5.19 (d,  $J = 1.5$  Hz, 1H), 5.10 (d,  $J = 1.0$  Hz, 1H), 5.04 (s, 1H), 4.81 (d,  $J = 1.0$  Hz, 1H), 3.82 (d,  $J = 6.0$  Hz, 5H), 3.78 (s, 3H), 3.12 (d,  $J = 14.0$  Hz, 1H), 2.94 (dd,  $J = 18.0, 14.0$  Hz, 2H), 2.78 (d,  $J = 14.5$  Hz, 2H), 2.44-2.40 (m, 2H), 1.67 (t,  $J = 8.5$  Hz, 2H), 1.14 (t,  $J = 7.0$  Hz, 3H).  $^{13}\text{C}$  NMR (126 MHz,  $\text{CDCl}_3$ )  $\delta$  175.91, 159.17, 159.13, 147.80, 145.35, 137.78, 135.49, 133.84, 130.31, 128.20, 127.97, 127.33, 126.53, 116.08, 113.66, 113.63, 110.78, 60.49, 55.43, 55.42, 50.54, 41.79, 41.16, 32.52, 30.04, 14.12. HRMS (ESI)  $m/z$ :  $[\text{M}+\text{Na}]^+$  calcd for  $\text{C}_{32}\text{H}_{36}\text{NaO}_4^+$  507.2506; found 507.2505.

### Ethyl 2-benzyl-5-(3-methoxyphenyl)-2-(2-(3-methoxyphenyl)allyl)hex-5-enoate

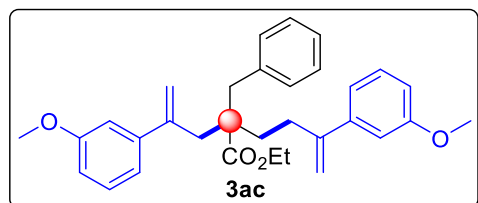

**(3ac):** The title compound was prepared according to the general procedure and purified by column chromatography to give a yellowish oil (50.3 mg, 52% yield).  $^1\text{H}$  NMR (500 MHz,

$\text{CDCl}_3$ )  $\delta$  7.20-7.17 (m, 5H), 7.07 (d,  $J = 7.5$  Hz, 2H), 6.90-6.76 (m, 6H), 5.27 (s, 1H), 5.16 (s, 1H), 5.11 (s, 1H), 4.87 (s, 1H), 3.83 (q,  $J = 7.5$  Hz, 2H), 3.79 (s, 3H), 3.77 (s, 3H), 3.09 (d,  $J = 14.0$  Hz, 1H), 2.94-2.89 (m, 2H), 2.79 (d,  $J = 14.5$  Hz, 1H), 2.45-2.42

(m, 2H), 1.68-1.66 (m, 2H), 1.13 (t,  $J = 7.0$  Hz, 3H).  $^{13}\text{C}$  NMR (126 MHz,  $\text{CDCl}_3$ )  $\delta$  175.76, 159.64, 159.50, 148.42, 145.88, 144.51, 143.08, 137.61, 130.25, 129.20, 128.16, 126.53, 119.43, 118.82, 117.28, 112.84, 112.71, 112.67, 112.44, 112.34, 60.48, 55.32, 50.54, 41.52, 41.14, 32.39, 30.05, 14.06. HRMS (ESI)  $m/z$ :  $[\text{M}+\text{Na}]^+$  calcd for  $\text{C}_{32}\text{H}_{36}\text{NaO}_4^+$  507.2506; found 507.2505.

**Ethyl 2-benzyl-5-(4-methoxyphenyl)-2-(2-(4-methoxyphenyl)allyl)hex-5-enoate**

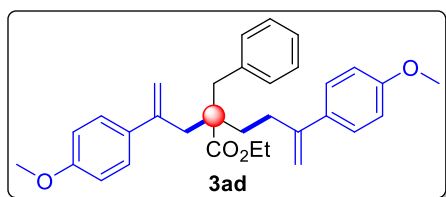

**(3ad):** The title compound was prepared according to the general procedure and purified by column chromatography to give a yellowish oil (33.7 mg, 35% yield).  $^1\text{H}$  NMR (500 MHz,  $\text{CDCl}_3$ )  $\delta$  7.25-7.16 (m, 7H), 7.09-7.08 (m, 2H), 6.82-6.78 (m, 4H), 5.19 (d,  $J = 1.5$  Hz, 1H), 5.10 (d,  $J = 1.0$  Hz, 1H), 5.05 (s, 1H), 4.81 (d,  $J = 0.5$  Hz, 1H), 3.82-3.78 (m, 8H), 3.10 (d,  $J = 14.0$  Hz, 1H), 2.91 (dd,  $J = 17.5, 14.5$  Hz, 2H), 2.77 (d,  $J = 14.5$  Hz, 1H), 2.46-2.37 (m, 2H), 1.66 (t,  $J = 9.0$  Hz, 2H), 1.12 (t,  $J = 7.0$  Hz, 3H).  $^{13}\text{C}$  NMR (126 MHz,  $\text{CDCl}_3$ )  $\delta$  175.89, 159.16, 159.12, 147.78, 145.34, 137.76, 135.48, 133.82, 130.30, 128.19, 127.96, 127.31, 126.52, 116.07, 113.65, 113.62, 110.77, 60.48, 55.42, 55.40, 50.53, 41.78, 41.15, 32.50, 30.03, 14.11. HRMS (ESI)  $m/z$ :  $[\text{M}+\text{Na}]^+$  calcd for  $\text{C}_{32}\text{H}_{36}\text{NaO}_4^+$  507.2506; found 507.2505.

**Ethyl 2-benzyl-5-(*m*-tolyl)-2-(2-(*m*-tolyl)allyl)hex-5-enoate (3ae):**

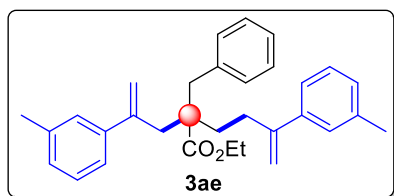

The title compound was prepared according to the general procedure and purified by column chromatography to give a yellowish oil (49.6 mg, 55% yield).  $^1\text{H}$  NMR (500 MHz,  $\text{CDCl}_3$ )  $\delta$  7.24-7.18 (m,

5H), 7.14-7.06 (m, 8H), 5.27 (d,  $J = 1.5$  Hz, 1H), 5.18 (d,  $J = 1.0$  Hz, 1H), 5.14 (d,  $J = 1.0$  Hz, 1H), 4.88 (d,  $J = 1.0$  Hz, 1H), 3.85 (q,  $J = 7.0$  Hz, 2H), 3.13 (d,  $J = 14.0$  Hz, 1H), 2.98-2.94 (m, 2H), 2.84 (d,  $J = 14.5$  Hz, 1H), 2.49-2.45 (m, 2H), 2.37 (s, 3H), 2.35 (s, 3H), 1.72-1.68 (m, 2H), 1.16 (t,  $J = 7.0$  Hz, 3H).  $^{13}\text{C}$  NMR (126 MHz,  $\text{CDCl}_3$ )  $\delta$  175.83, 148.62, 146.11, 143.00, 141.51, 137.72, 137.70, 137.67, 130.26, 128.18,

128.16, 128.13, 127.60, 127.02, 126.52, 124.02, 123.42, 116.97, 112.08, 60.42, 50.50, 41.56, 41.06, 32.33, 29.98, 21.62, 21.55, 14.09. HRMS (ESI)  $m/z$ :  $[M+Na]^+$  calcd for  $C_{32}H_{36}NaO_2^+$  475.2608; found 475.2602.

**Ethyl 2-benzyl-5-(*p*-tolyl)-2-(2-(*p*-tolyl)allyl)hex-5-enoate (3af):**

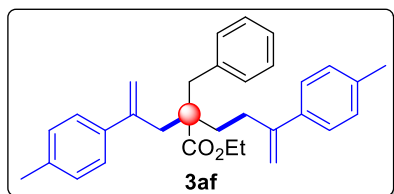

The title compound was prepared according to the general procedure and purified by column chromatography to give a yellowish oil (49.5 mg, 55% yield).  $^1H$  NMR (500 MHz,  $CDCl_3$ )  $\delta$  7.26-7.05 (m, 13H), 5.23 (d,  $J = 1.5$  Hz, 1H), 5.14 (s, 1H), 5.07 (s, 1H), 4.82 (s, 1H), 3.82 (q,  $J = 7.0$  Hz, 2H), 3.10 (d,  $J = 14.0$  Hz, 1H), 2.93-2.88 (m, 2H), 2.79 (d,  $J = 14.5$  Hz, 1H), 2.45-2.40 (m, 2H), 2.33 (s, 3H), 2.31 (s, 3H), 1.67-1.64 (m, 2H), 1.12 (t,  $J = 7.5$  Hz, 3H).  $^{13}C$  NMR (126 MHz,  $CDCl_3$ )  $\delta$  175.86, 148.23, 145.82, 140.14, 138.46, 137.75, 137.07, 130.30, 128.96, 128.89, 128.16, 126.75, 126.50, 126.10, 116.54, 111.48, 60.44, 50.56, 41.60, 41.11, 32.49, 29.96, 21.21, 21.19, 14.08. HRMS (ESI)  $m/z$ :  $[M+Na]^+$  calcd for  $C_{32}H_{36}NaO_2^+$  475.2608; found 475.2602.

**Ethyl 2-benzyl-5-(naphthalen-2-yl)-2-(2-(naphthalen-2-yl)allyl)hex-5-enoate (3ag):**

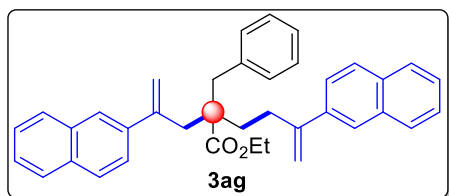

The title compound was prepared according to the general procedure and purified by column chromatography to give a yellowish oil (65.8 mg, 63% yield).  $^1H$  NMR (500 MHz,  $CDCl_3$ )  $\delta$  7.81-7.66 (m, 8H), 7.48-7.43 (m, 5H), 7.38-7.36 (m, 1H), 7.19-7.18 (m, 3H), 7.12-7.10 (m, 2H), 5.40 (s, 1H), 5.26 (d,  $J = 4.0$  Hz, 2H), 4.94 (s, 1H), 3.73-3.67 (m, 2H), 3.18-3.08 (m, 2H), 3.01-2.93 (m, 2H), 2.62-2.58 (m, 2H), 1.78-1.74 (m, 2H), 1.05 (t,  $J = 7.5$  Hz, 3H).  $^{13}C$  NMR (126 MHz,  $CDCl_3$ )  $\delta$  175.86, 148.34, 145.91, 140.21, 138.65, 137.64, 133.45, 133.33, 132.88, 132.82, 130.26, 128.26, 128.23, 128.18, 127.79, 127.64, 126.61, 126.24, 126.16, 125.92, 125.86, 125.48, 125.40, 124.83, 117.89, 112.93, 60.51, 50.62, 41.72, 41.26, 32.44, 30.07, 14.02. HRMS (ESI)  $m/z$ :  $[M+Na]^+$  calcd for  $C_{38}H_{36}NaO_2^+$  547.2608; found 547.2607.

**Ethyl 5-([1,1'-biphenyl]-4-yl)-2-(2-([1,1'-biphenyl]-4-yl)allyl)-2-benzylhex-5-**

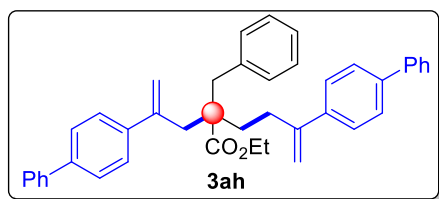

**enoate (3ah):** The title compound was prepared according to the general procedure and purified by column chromatography to give a white solid (47.8 mg, 41% yield).  $^1\text{H}$  NMR (500 MHz,  $\text{CDCl}_3$ )

$\delta$  7.59-7.30 (m, 18H), 7.23-7.22 (m, 3H), 7.14-7.12 (m, 2H), 5.34 (d,  $J = 1.5$  Hz, 1H), 5.24 (d,  $J = 1.0$  Hz, 1H), 5.28 (s, 1H), 4.91 (d,  $J = 0.5$  Hz, 1H), 3.86 (q,  $J = 7.0$  Hz, 2H), 3.18 (d,  $J = 14.0$  Hz, 1H), 3.02-2.97 (m, 2H), 2.89 (d,  $J = 15.0$  Hz, 1H), 2.53-2.49 (m, 2H), 1.74-1.71 (m, 2H), 1.16 (t,  $J = 7.0$  Hz, 3H).  $^{13}\text{C}$  NMR (126 MHz,  $\text{CDCl}_3$ )  $\delta$  175.72, 147.75, 145.41, 141.81, 140.78, 140.75, 140.16, 140.06, 137.52, 130.13, 128.79, 128.77, 128.13, 127.28, 127.24, 127.19, 126.98, 126.96, 126.86, 126.83, 126.47, 117.33, 112.23, 60.44, 50.55, 41.47, 41.17, 32.22, 29.80, 29.71, 14.01. HRMS (ESI)  $m/z$ :  $[\text{M}+\text{Na}]^+$  calcd for  $\text{C}_{42}\text{H}_{40}\text{NaO}_2^+$  599.2921; found 599.2931.

**Ethyl 5-methyl-2-(2-methylallyl)-2-(naphthalen-2-yl)hex-5-enoate (3uk)**

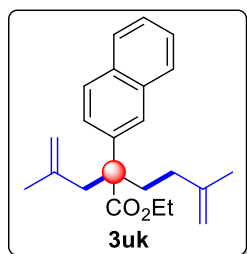

The title compound was prepared according to the general procedure and purified by column chromatography to give a yellowish oil (19.6 mg, 29% yield).  $^1\text{H}$  NMR (600 MHz,  $\text{CDCl}_3$ )

$\delta$  7.83-7.78 (m, 3H), 7.75 (s, 1H), 7.49-7.45 (m, 2H), 7.41 (dd,  $J = 8.4, 1.8$  Hz, 1H), 4.84 (s, 1H), 4.70-4.84 (m, 3H), 4.17-4.08 (m, 2H), 3.06 (d,  $J = 13.8$  Hz, 1H), 2.90 (d,  $J = 13.8$  Hz, 1H), 2.36-2.32 (m, 1H), 2.29-2.25 (m, 1H), 1.85-1.82 (m, 2H), 1.70 (s, 3H), 1.44 (s, 3H), 1.15 (t,  $J = 7.2$  Hz, 3H).  $^{13}\text{C}$  NMR (151 MHz,  $\text{CDCl}_3$ )  $\delta$  175.81, 145.87, 141.99, 140.30, 133.36, 132.35, 128.30, 128.05, 127.58, 126.19, 126.01, 125.29, 125.13, 115.43, 110.07, 60.98, 53.25, 42.47, 32.60, 32.57, 23.99, 22.76, 14.16. HRMS (ESI)  $m/z$ :  $[\text{M}+\text{H}]^+$  calcd for  $\text{C}_{23}\text{H}_{29}\text{O}_2^+$  337.2162; found 337.2160.

## 5. Scale-up Experiment

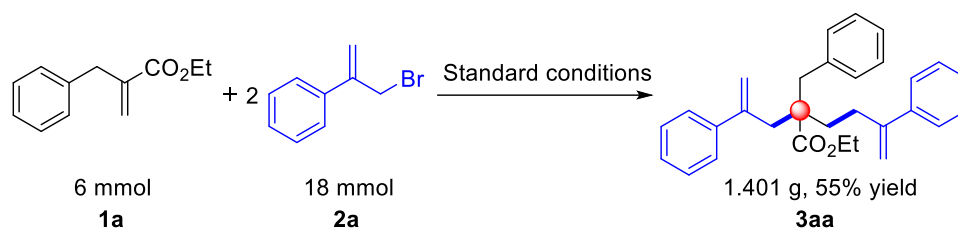

Ethyl 2-benzylacrylate **1a** (1140.0 mg, 6 mmol), 3-bromoprop-1-en-2-ylbenzene **2a** (3546.0 mg, 18 mmol), Cp<sup>\*</sup>Ru(cod)Cl (114.0 mg, 0.3 mmol, 5 mol%), Mg (364.5 mg, 15 mmol), NMP (30.0 mL) were added to a flame-dried Young-type tube. The mixture was stirred under Ar at 0 °C for 12 h. After rising to room temperature, the reaction mixture was treated with saturated NH<sub>4</sub>Cl<sub>(aq.)</sub> (100 mL), extracted with ethyl acetate (3 x 50 mL), washed with saturated NaCl<sub>(aq.)</sub> (3 x 50 mL), and dried over Na<sub>2</sub>SO<sub>4</sub>. Then, the solvent (ethyl acetate) was removed in vacuo and the residue was purified by flash column chromatography on silica gel and eluted with ethyl acetate/petroleum ether (1/100) to afford the desired product **3aa** (1.401 g, 55% yield).

## 6. Radical test

When TEMPO (4 equiv.), or BHT (4 equiv.) was introduced to the standard conditions, the desired product **3aa** was obtained in 55% and 62% yields, respectively. These results indicated that a radical pathway should be ruled out in this reaction.

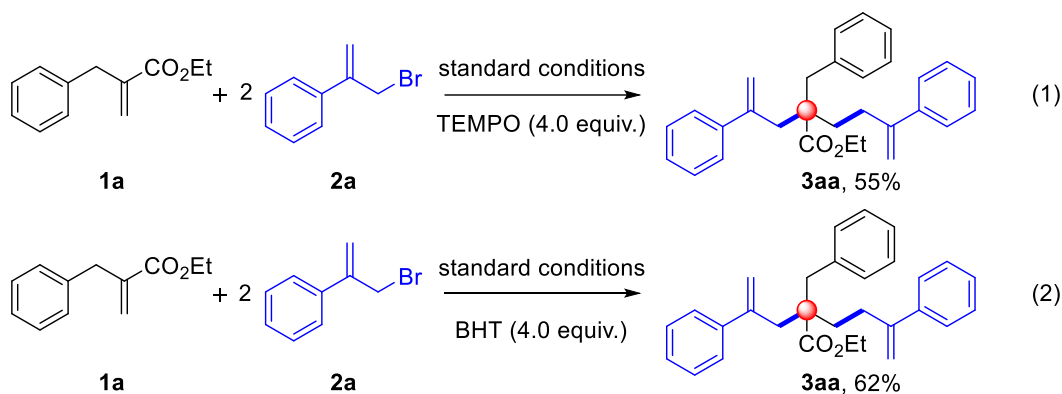

## 7. References

- [1] S. Yu, C. Gong, Z. Liu and Y. Zhang, *Org. Lett.*, 2022, **24**, 4871-4875.
- [2] M. Schade, B. Merla, B. Lesch, M. Wagener, S. Timmermanns, K. Pletinckx and T. Hertrampf, *J. Med. Chem.*, 2020, **63**, 11801-11808.
- [3] J. Kim and S. Chang, *Angew. Chem. Int. Ed.*, 2014, **53**, 2203-2207.
- [4] S. A. Cronin and S. J. Connon, *Org. Biomol. Chem.*, 2021, **19**, 7348-7352.
- [5] X. Dong, Y. Han, F. Yan, Q. Liu, P. Wang, K. Chen and H. Liu, *Org. Lett.*, 2016, **18**, 3774-3777.
- [6] X. Dong, L. P. Xu, Y. Yang, Y. Liu, X. Li, Q. Liu and H. Liu, *Org. Chem. Front.*, 2021, **8**, 6009-6018.
- [7] C. B. Tripathi and S. Mukherjee, *Angew. Chem. Int. Ed.*, 2013, **52**, 8450-8453.
- [8] Y. Jin, Y. Zou, Y. Hu, Y. Han, Z. Zhang and W. Zhang, *Chem. Eur. J.*, 2022, **28**, e202201517.
- [9] T. Huang, T. Cheng, L.-B. Han, *J. Org. Chem.*, 2018, **83**, 2959-2965.
- [10] L. Ren, M. Ran, X. Fang, L. Zhao, Q. Yao, *Chin. J. Org. Chem.*, 2018, **38**, 2791-2797.
- [11] J. M. Bauer, R. Peters, *Catal. Sci. Technol.*, 2015, **5**, 2340-2346.
- [12] Y. Cao, H. Zhao, D. Zhang-Negrerie, Y. Du, K. Zhao, *Adv. Synth. Catal.*, 2016, **358**, 3610-3615.
- [13] M. Zhang, X. Ding, A. Lu, J. Kang, Y. Gao, Z. Wang, H. Li, Q. Wang, *Org. Chem. Front.*, 2021, **8**, 961-967.
- [14] A. Gualandi, D. Mazzearella, A. Ortega-Martínez, L. Mengozzi, F. Calcinelli, E. Matteucci, F. Monti, N. Armaroli, L. Sambri and P. G. Cozzi, *ACS Catal.* 2017, **7**, 5357-5362.

## 8. Copies for $^1\text{H}$ NMR and $^{13}\text{C}$ NMR spectra of the products

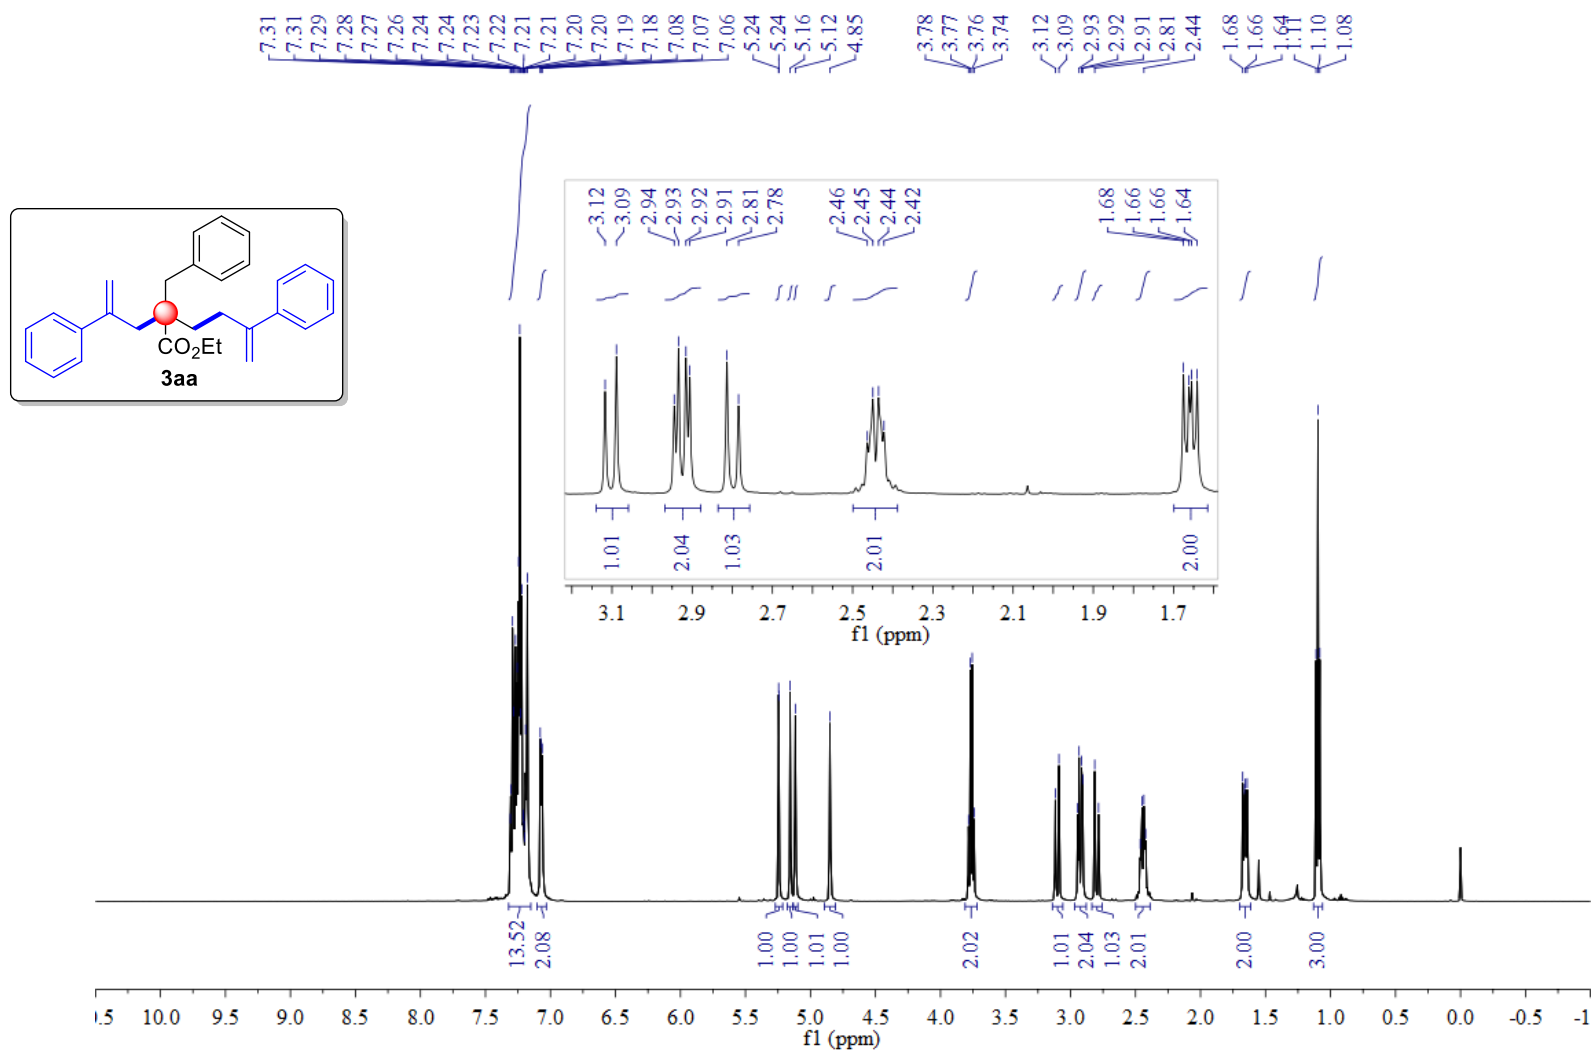

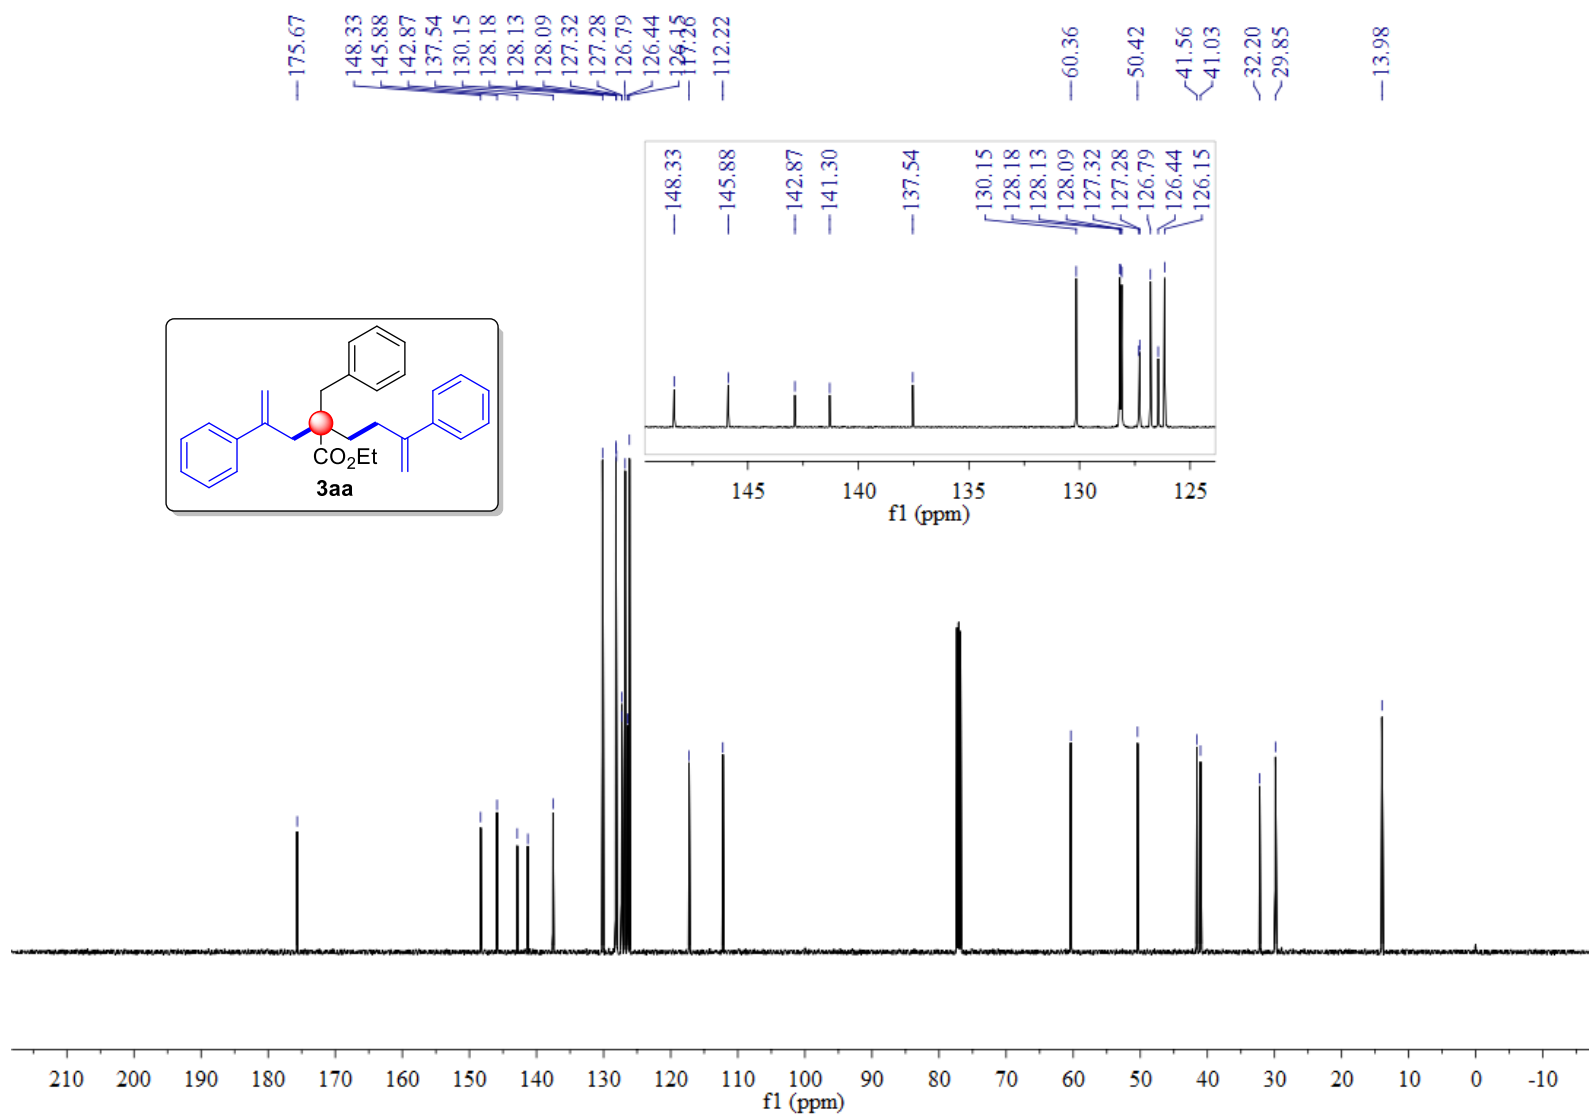

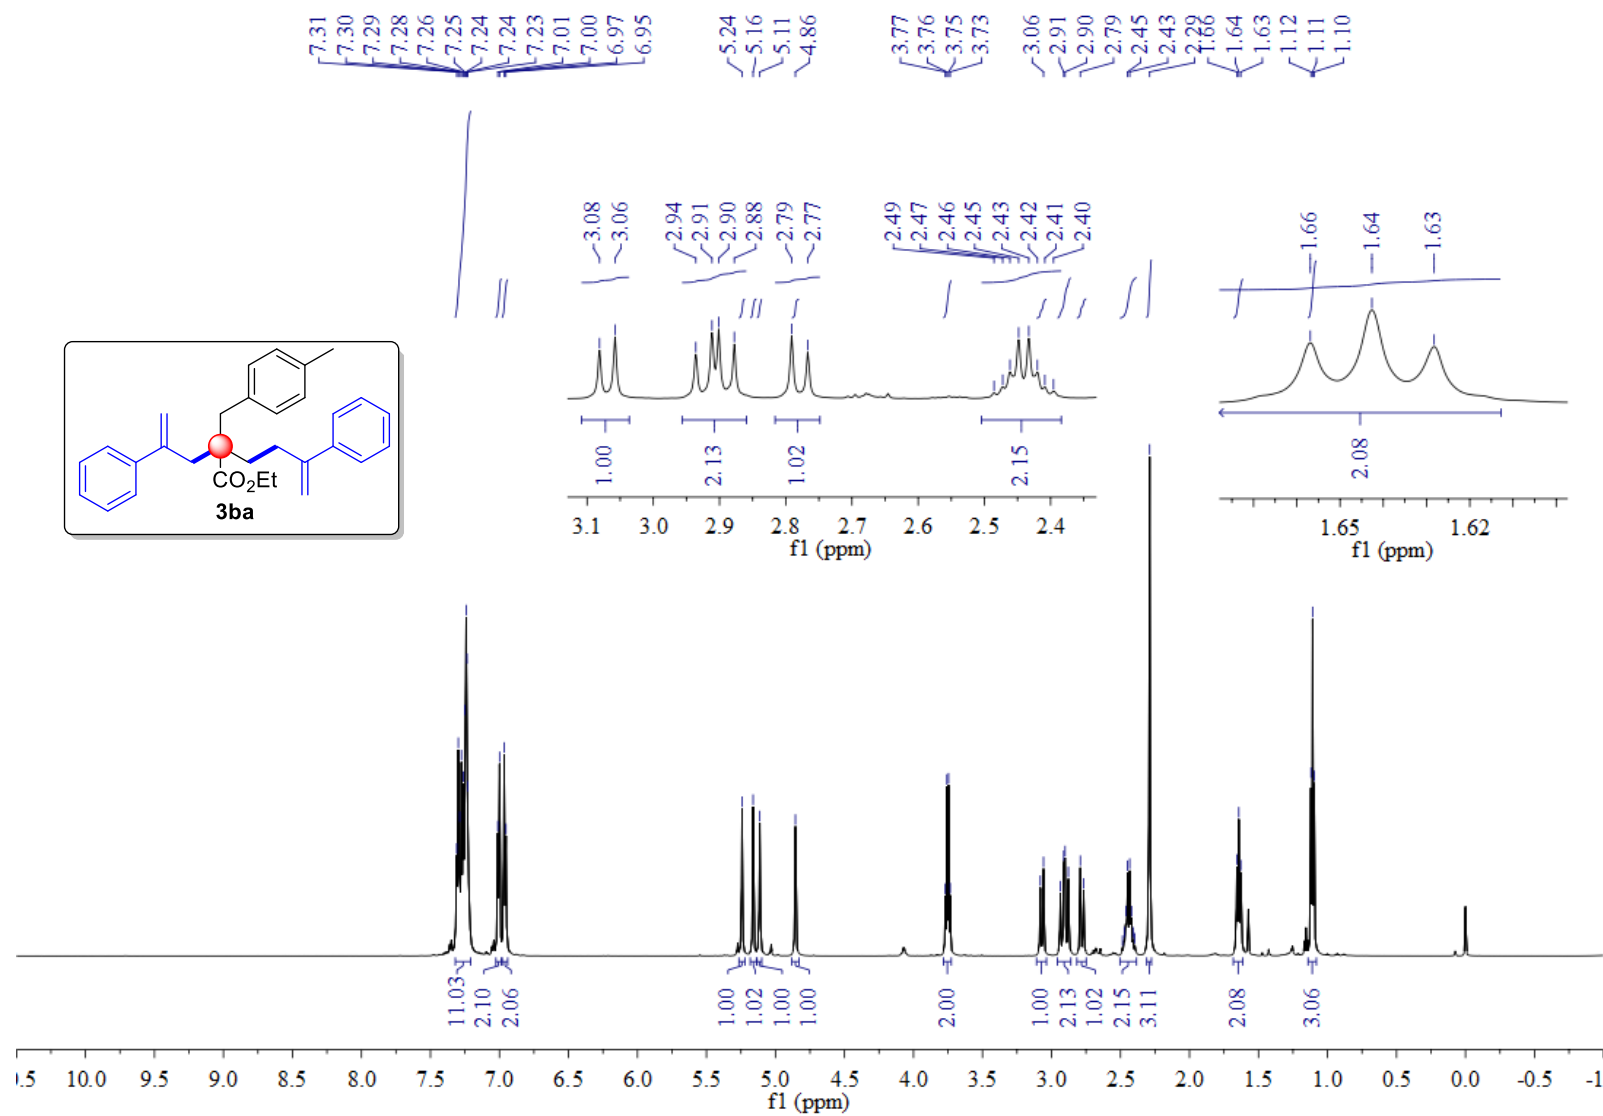

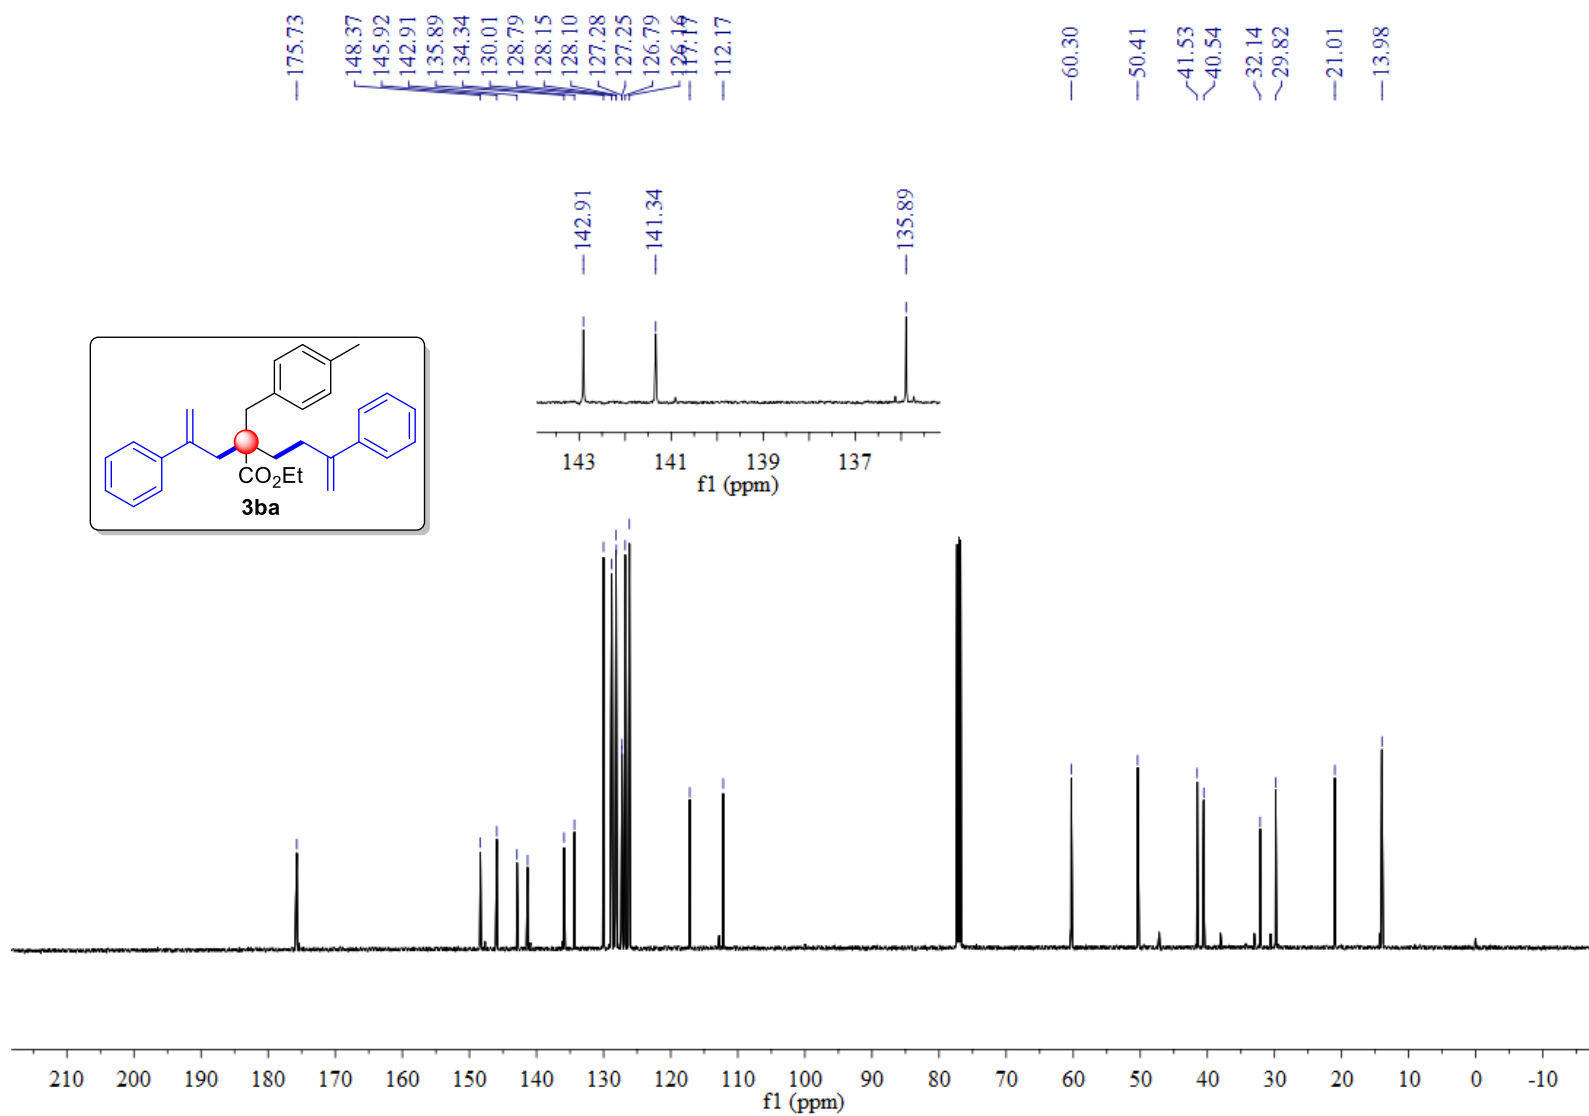

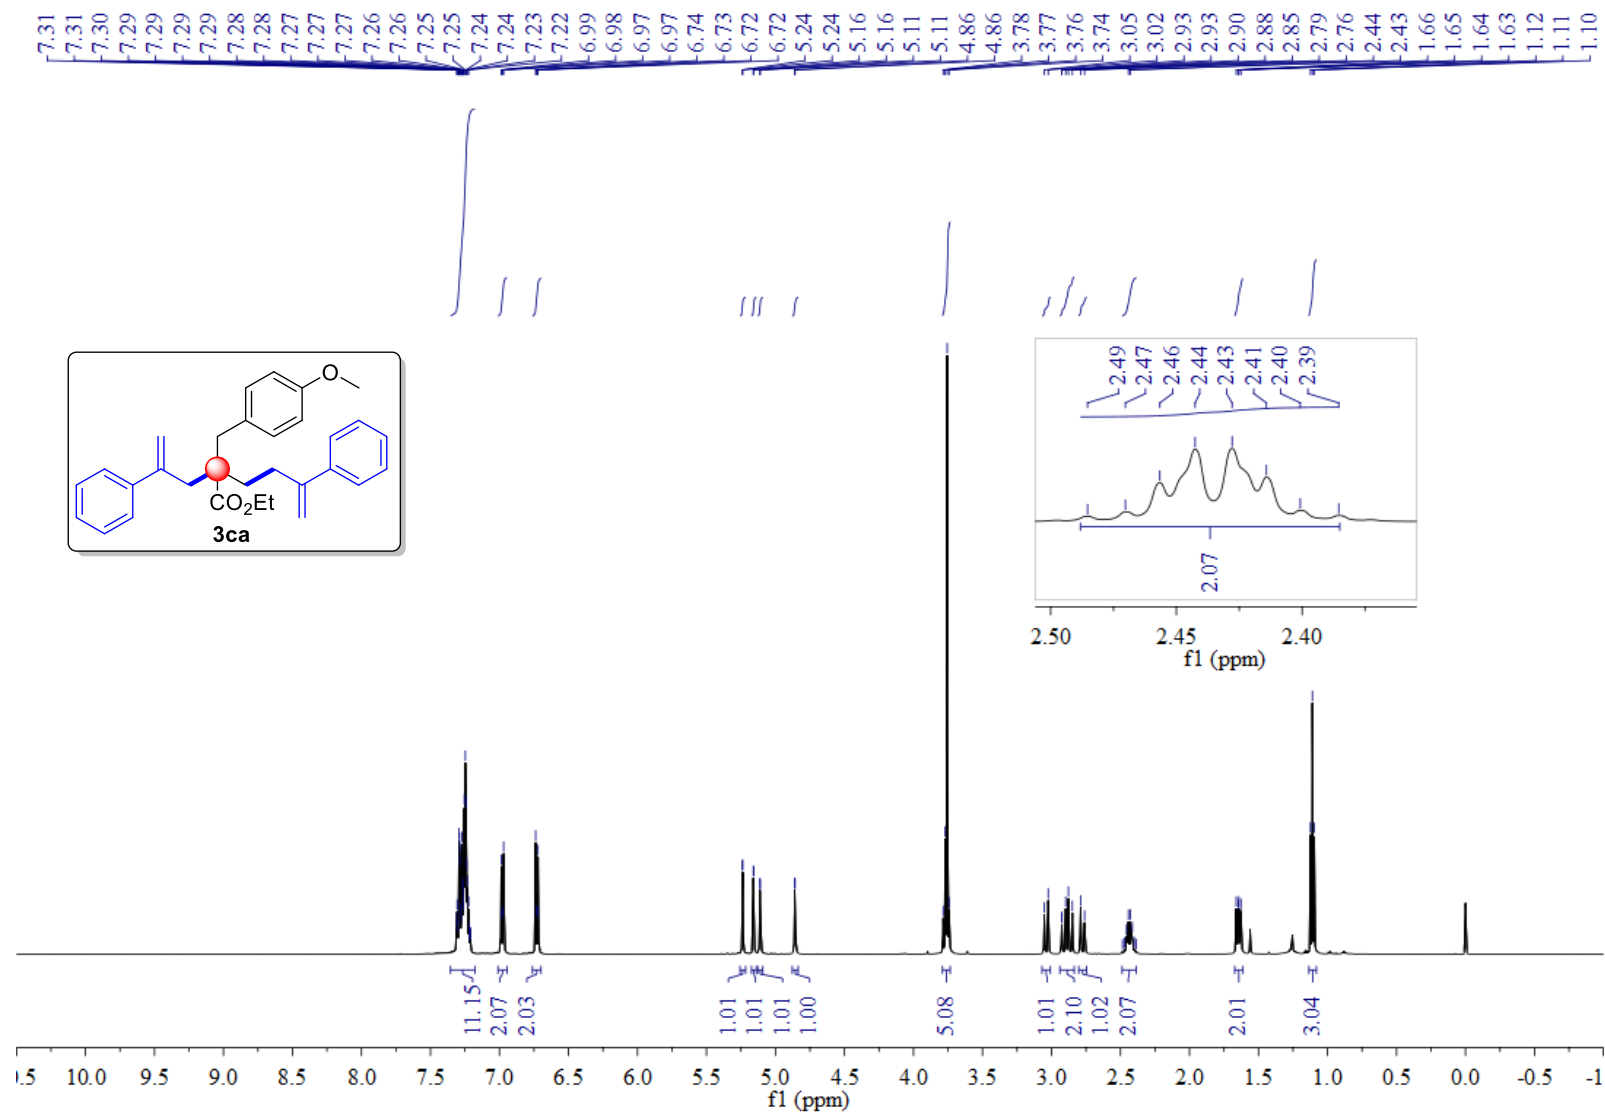

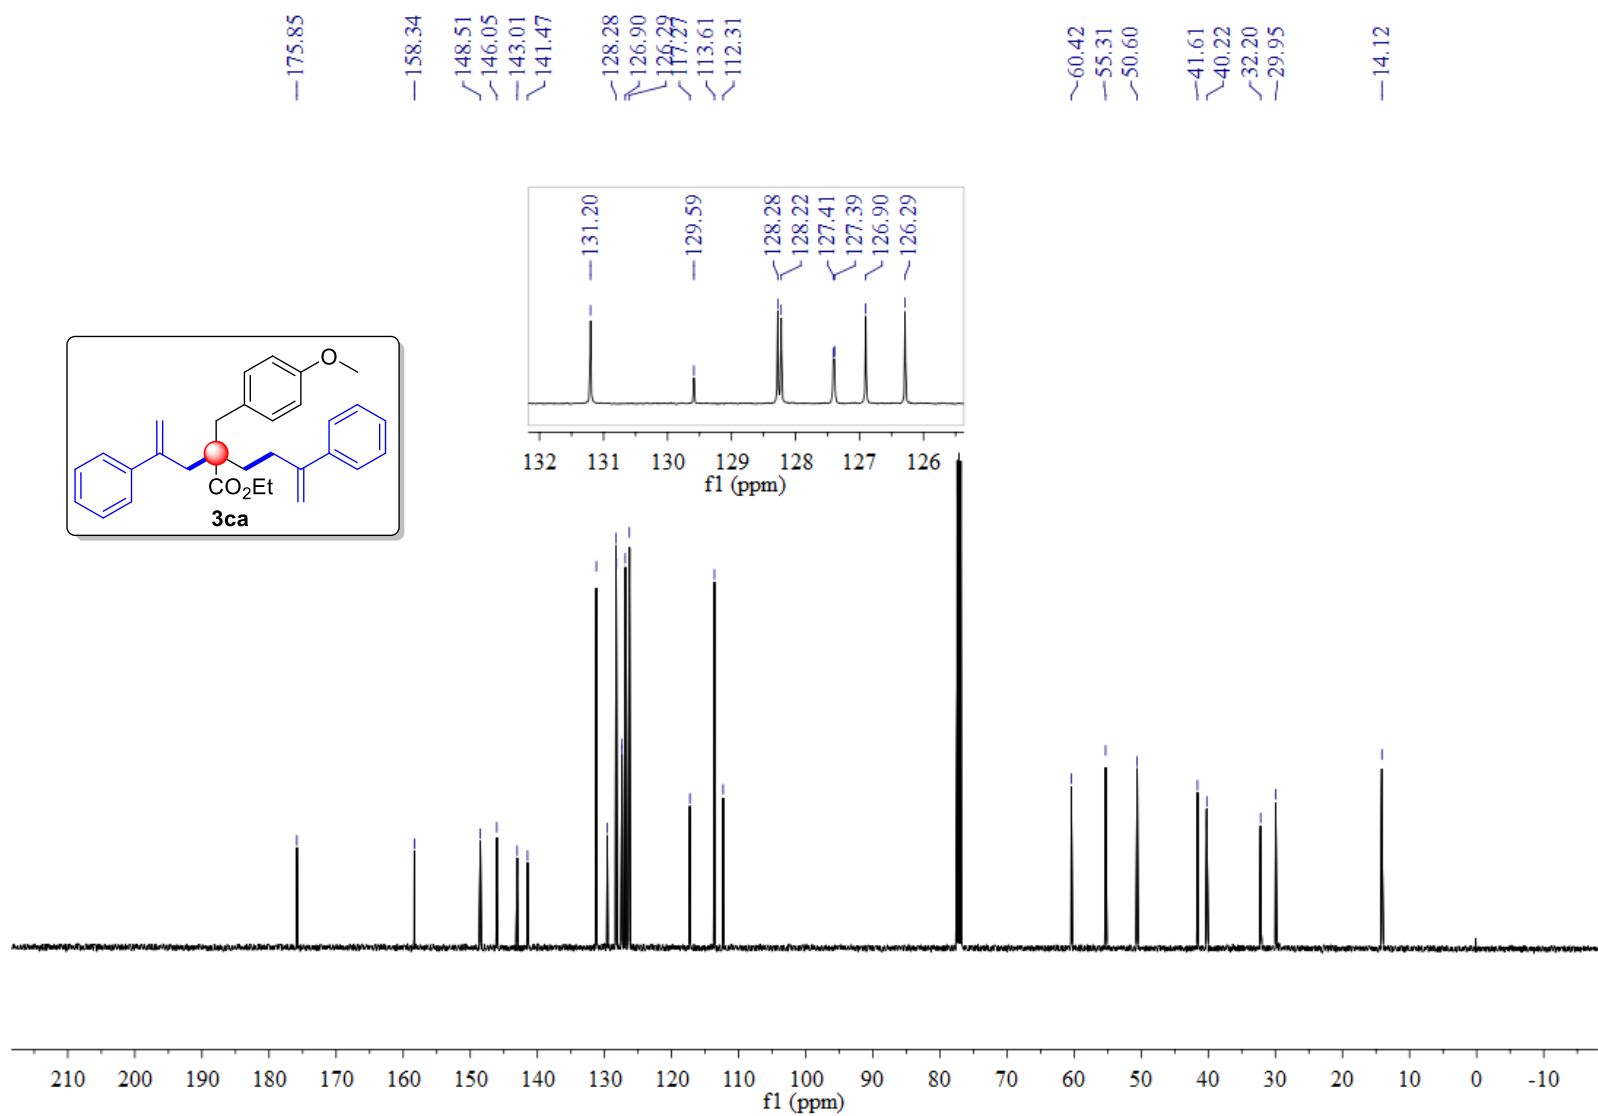

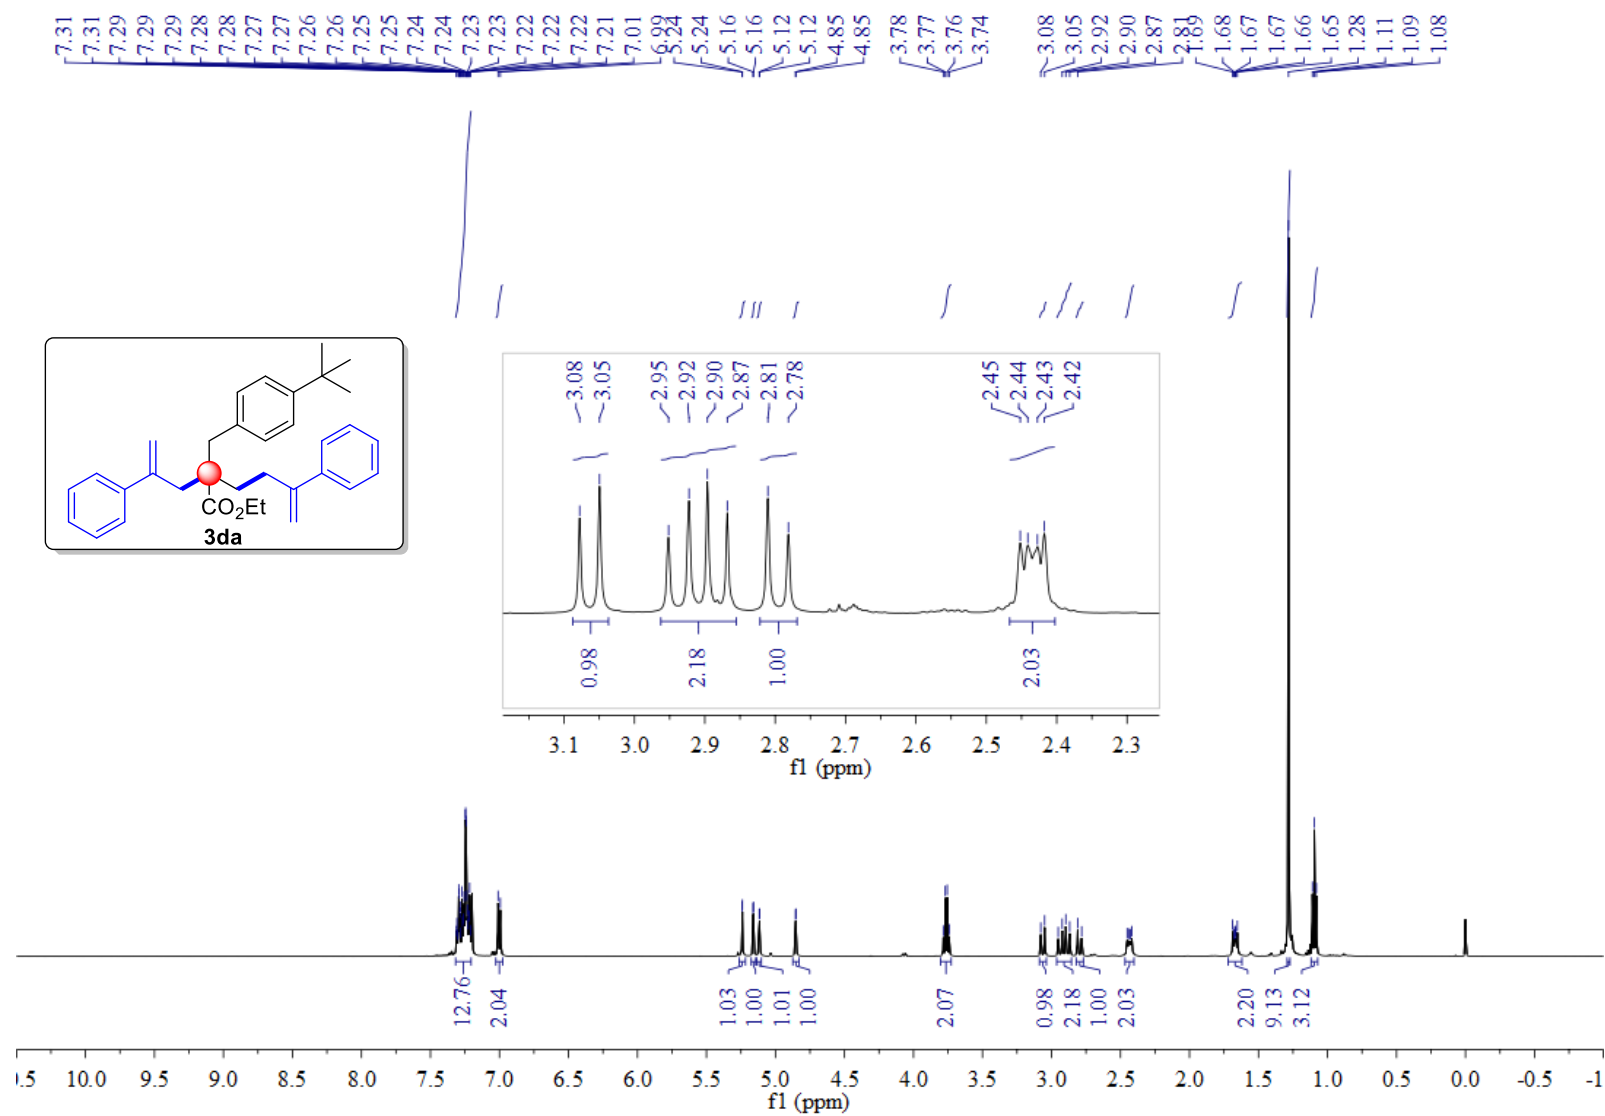



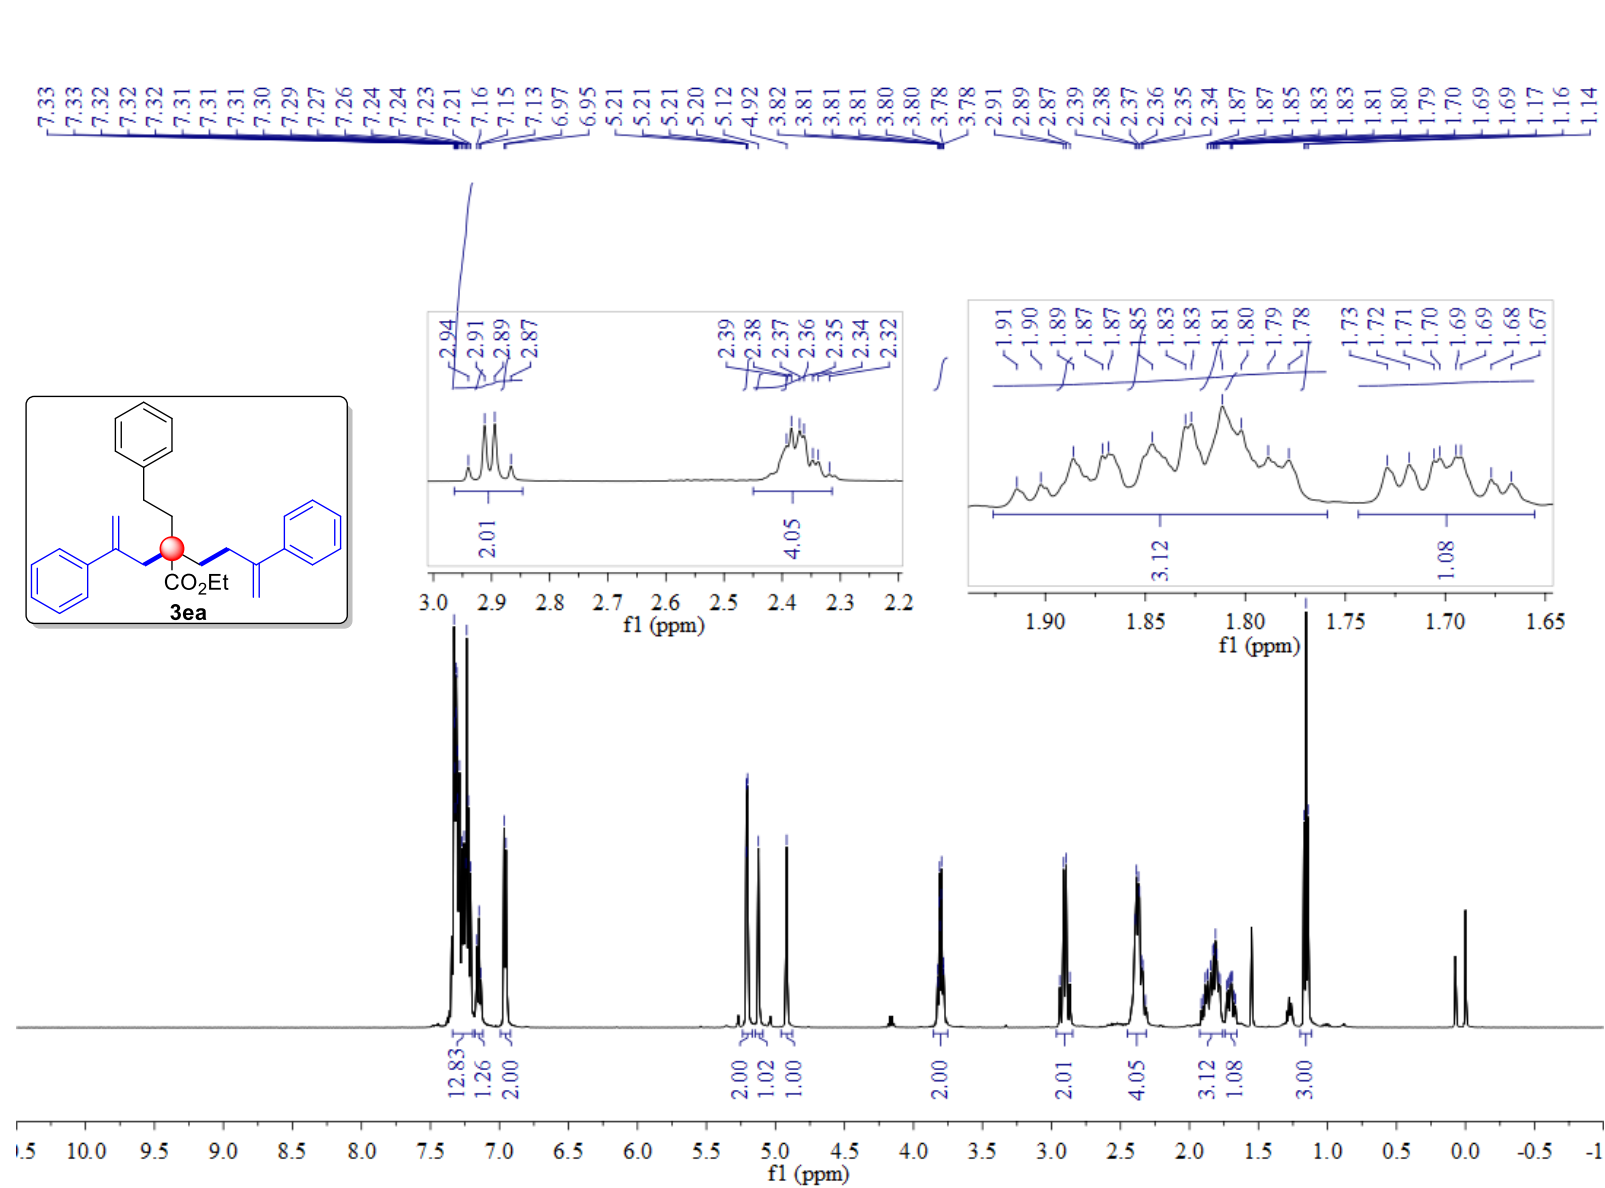

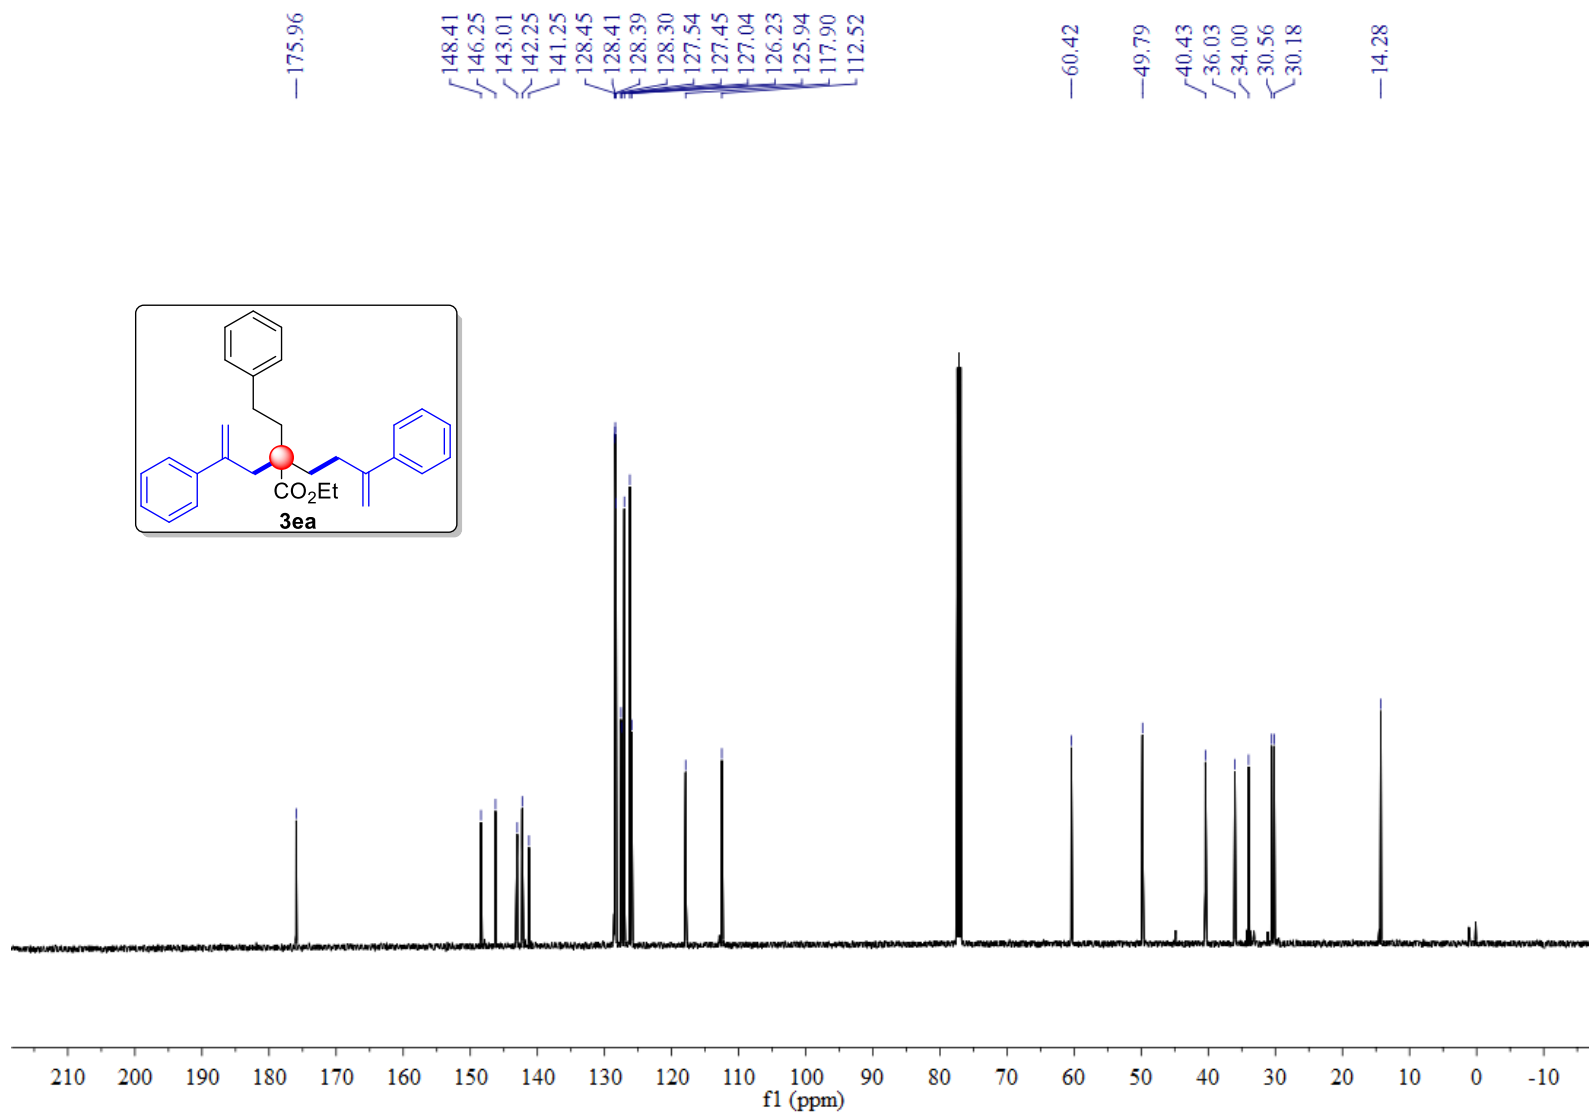

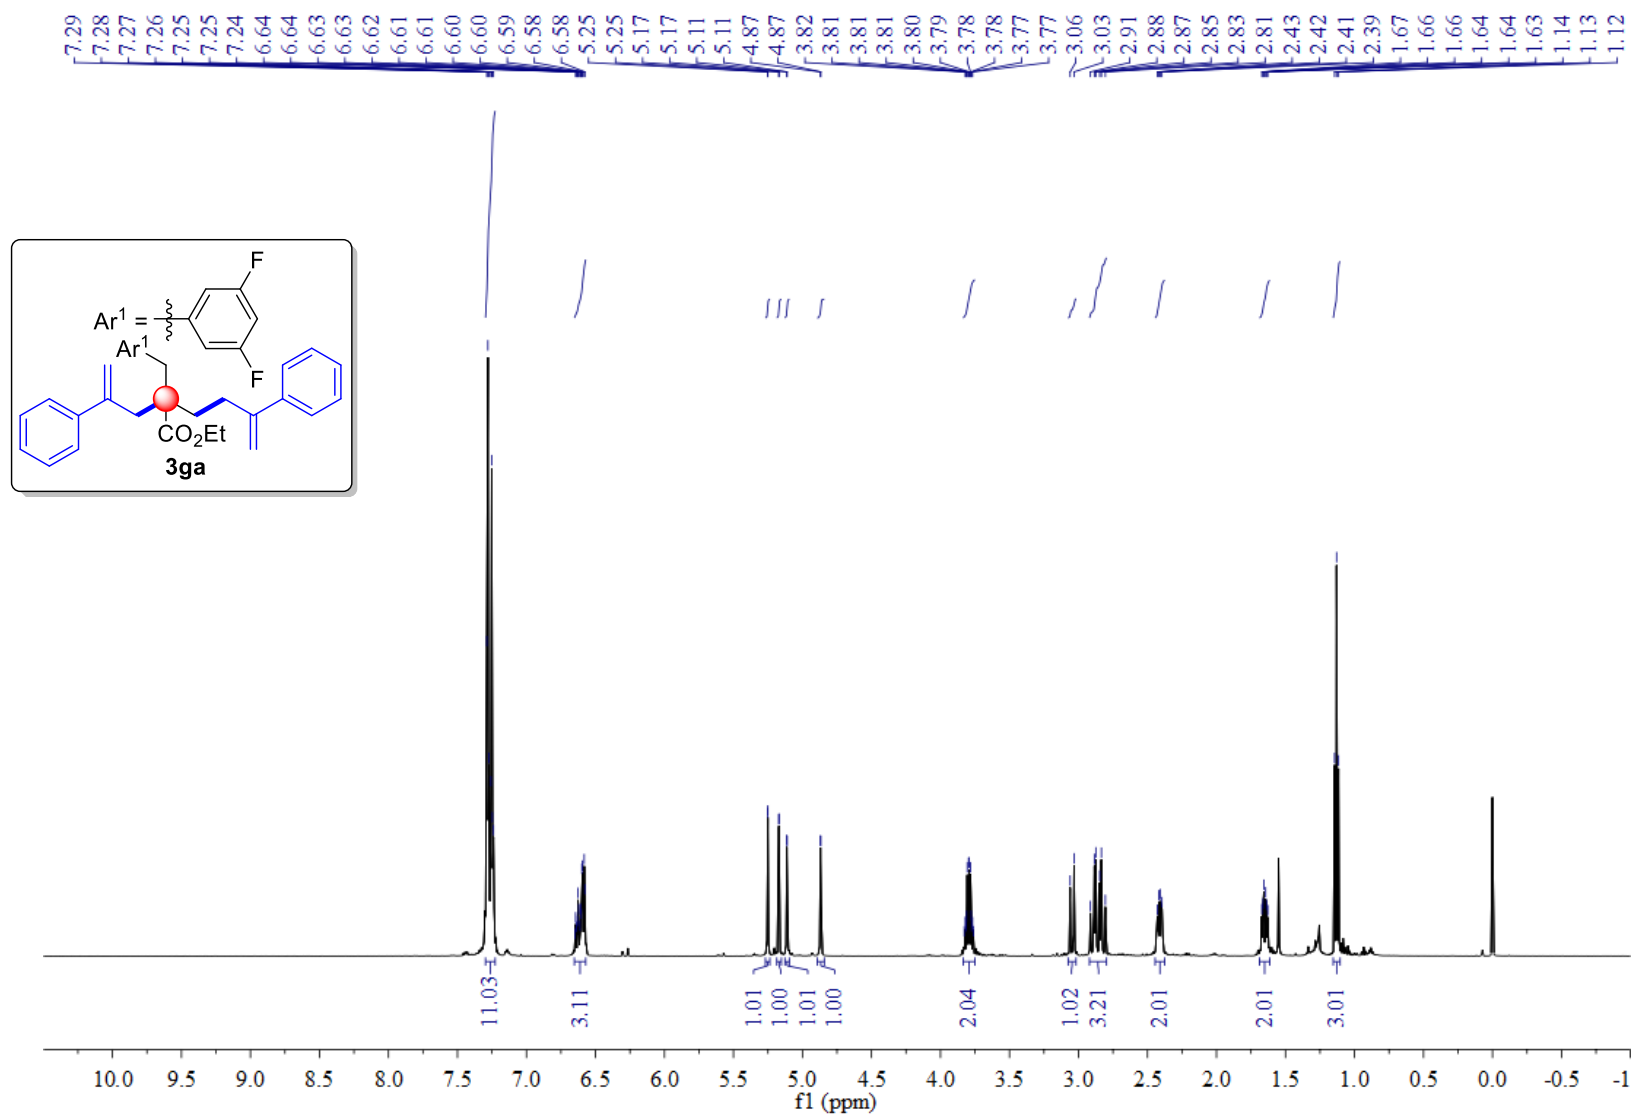

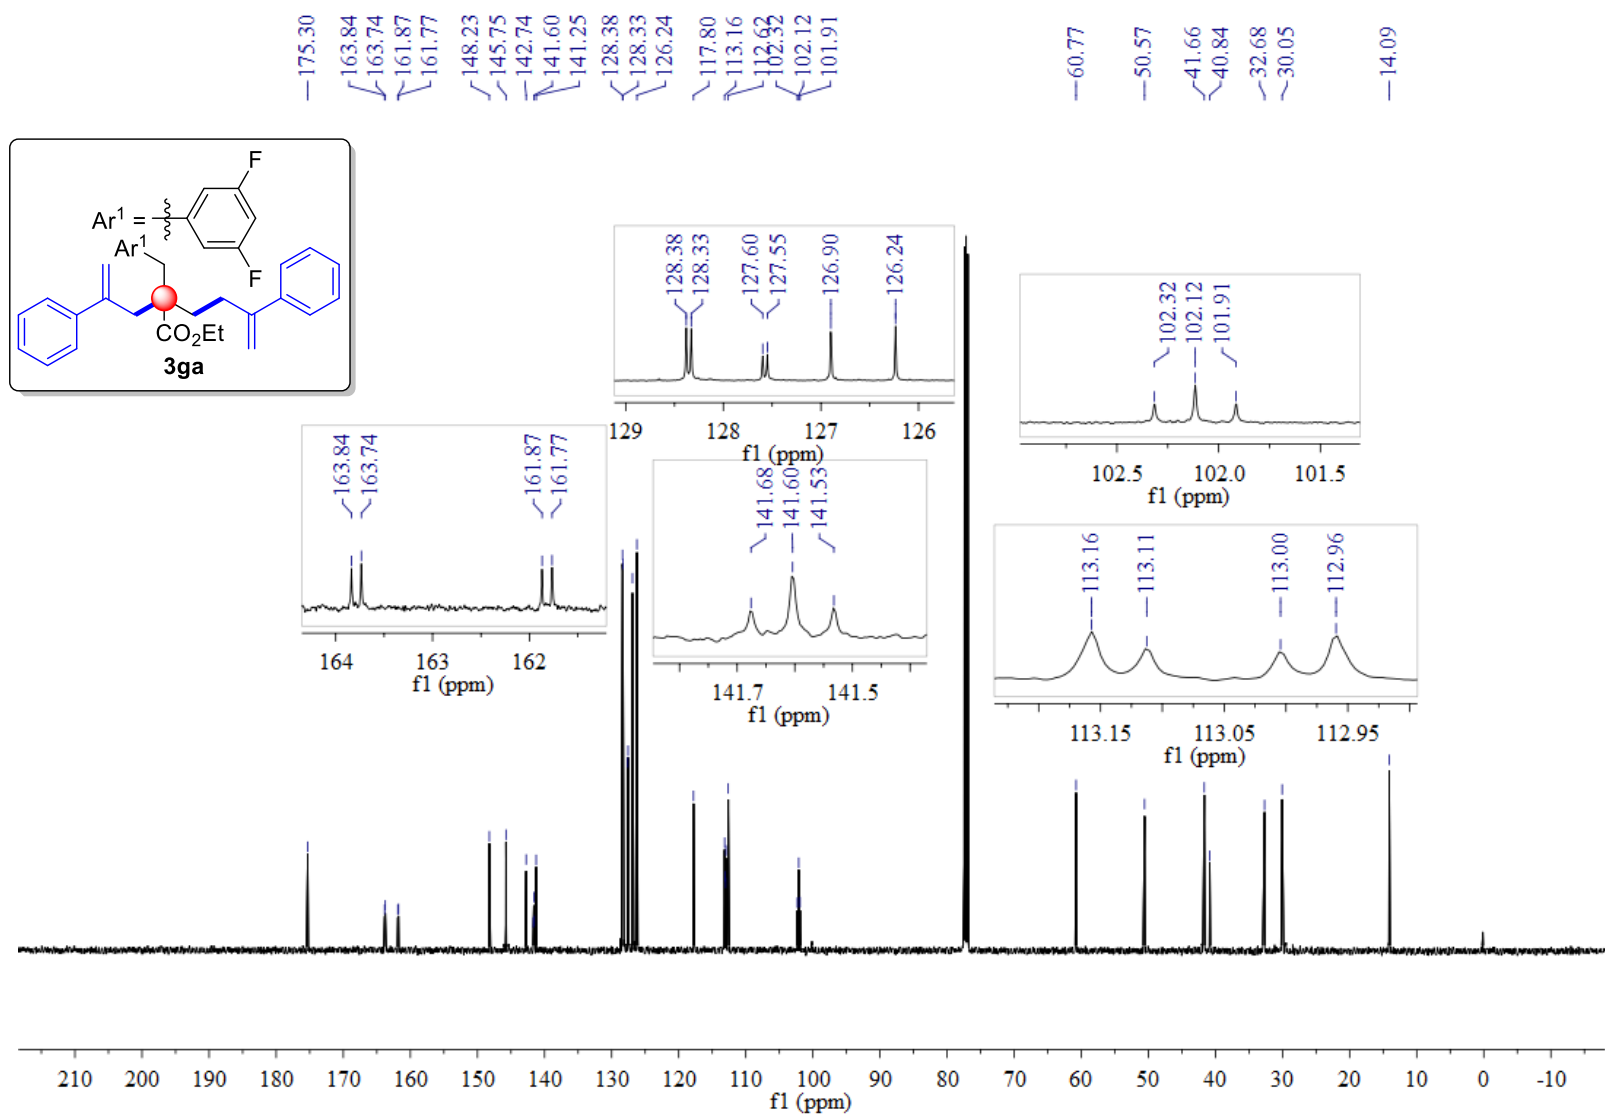

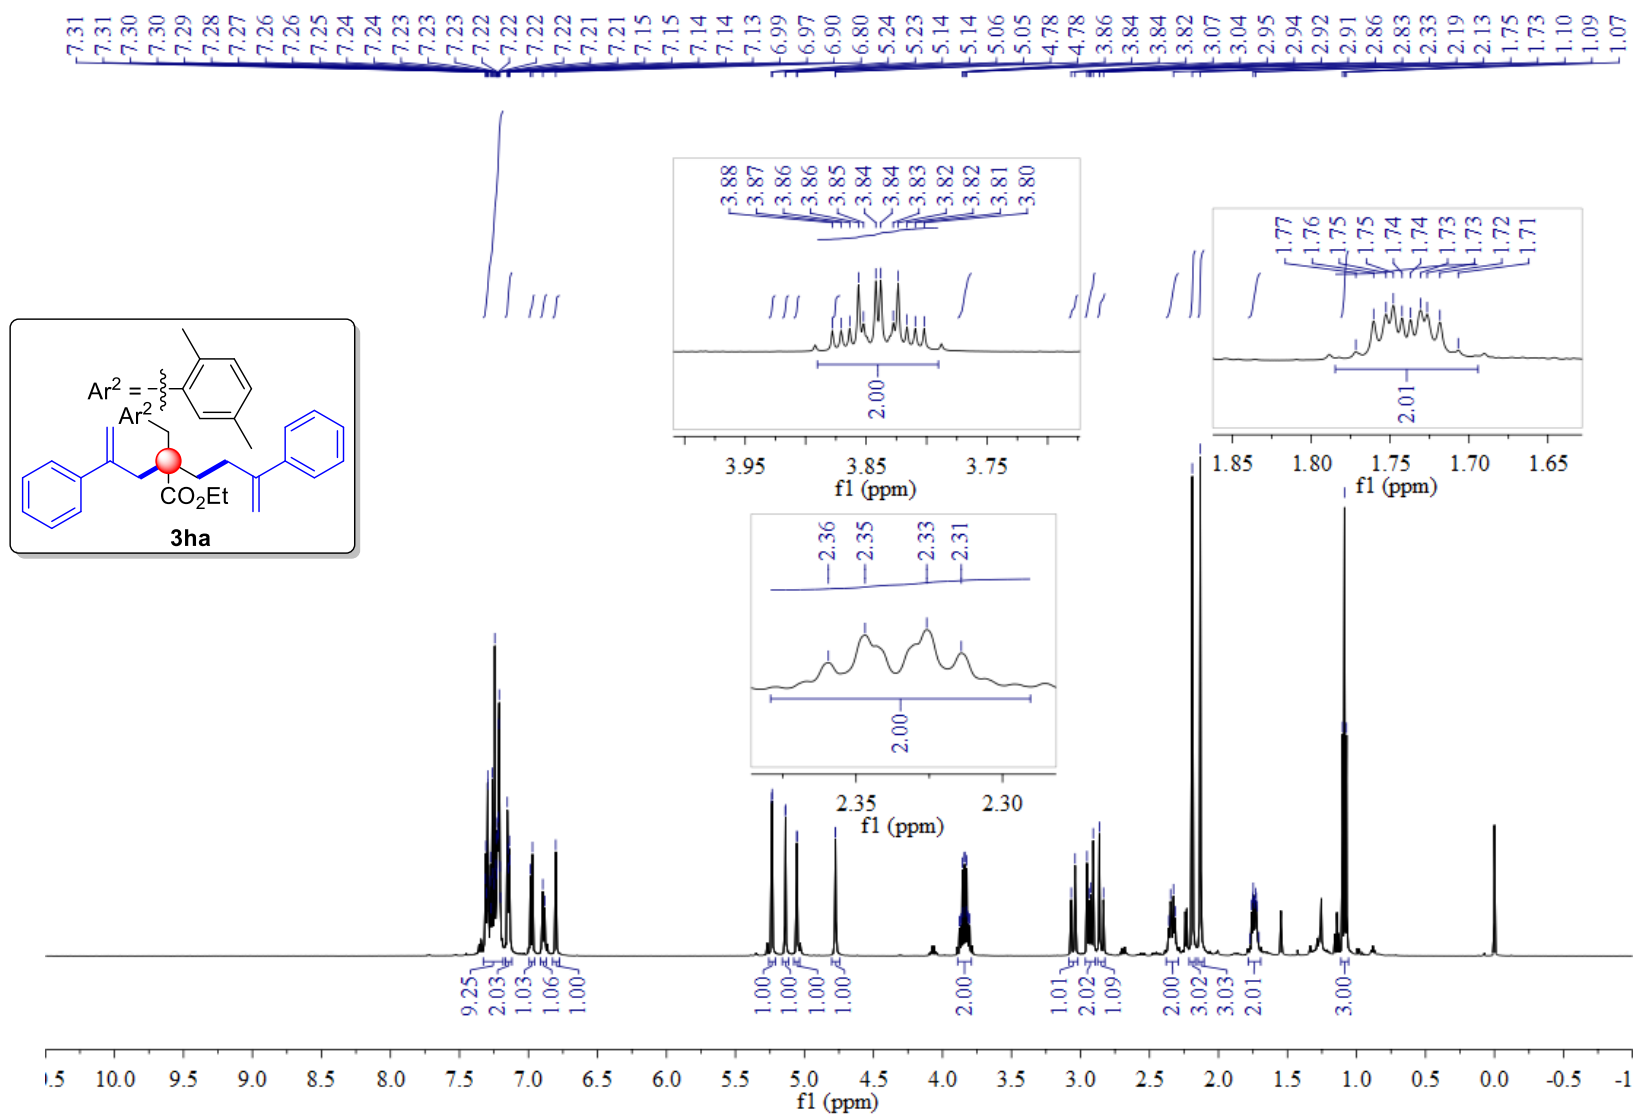

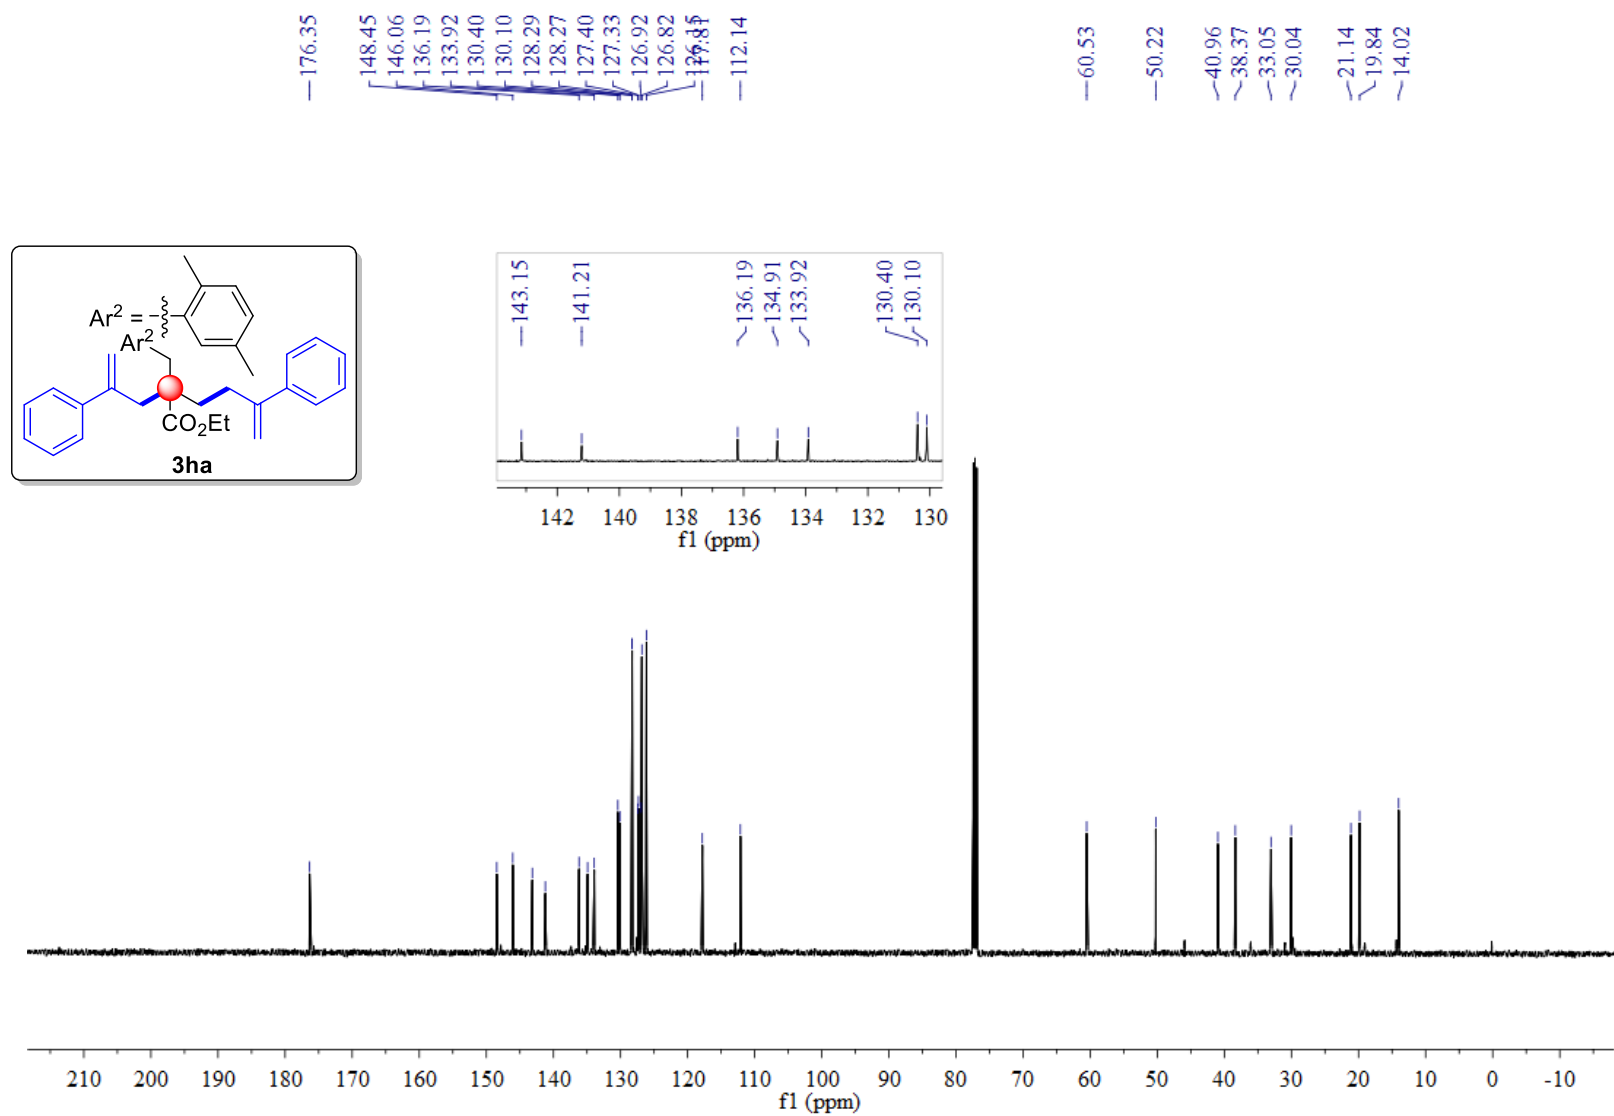

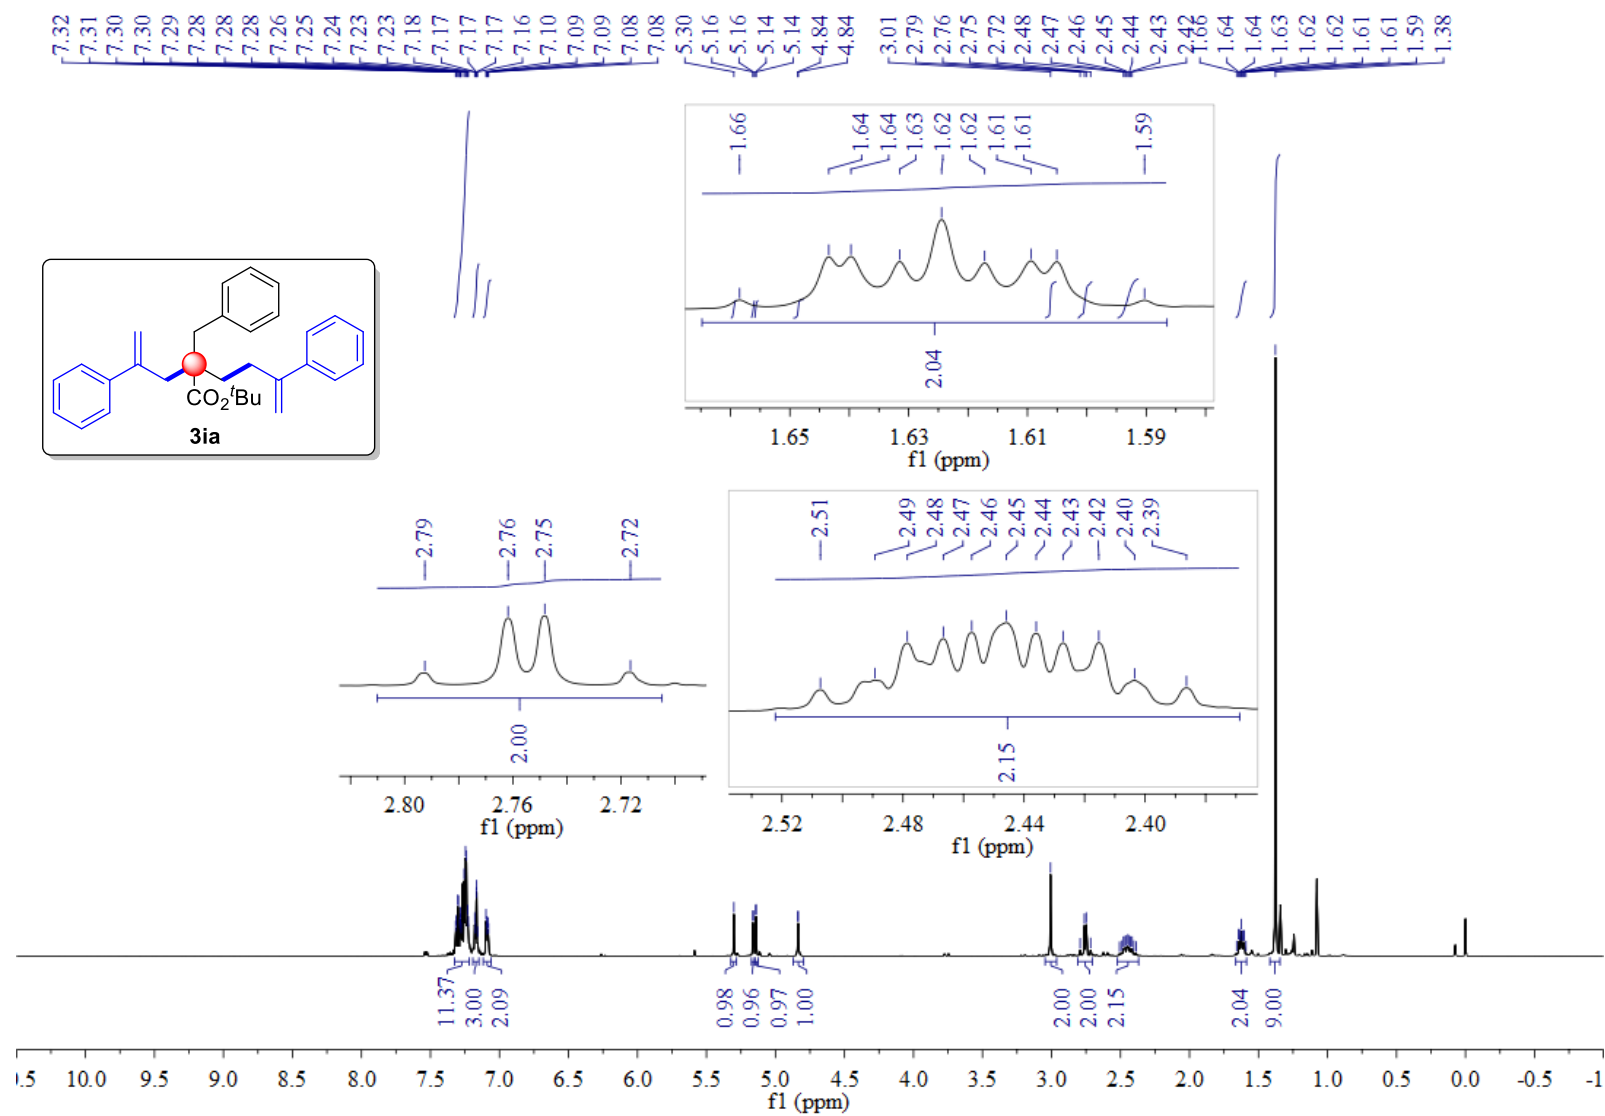

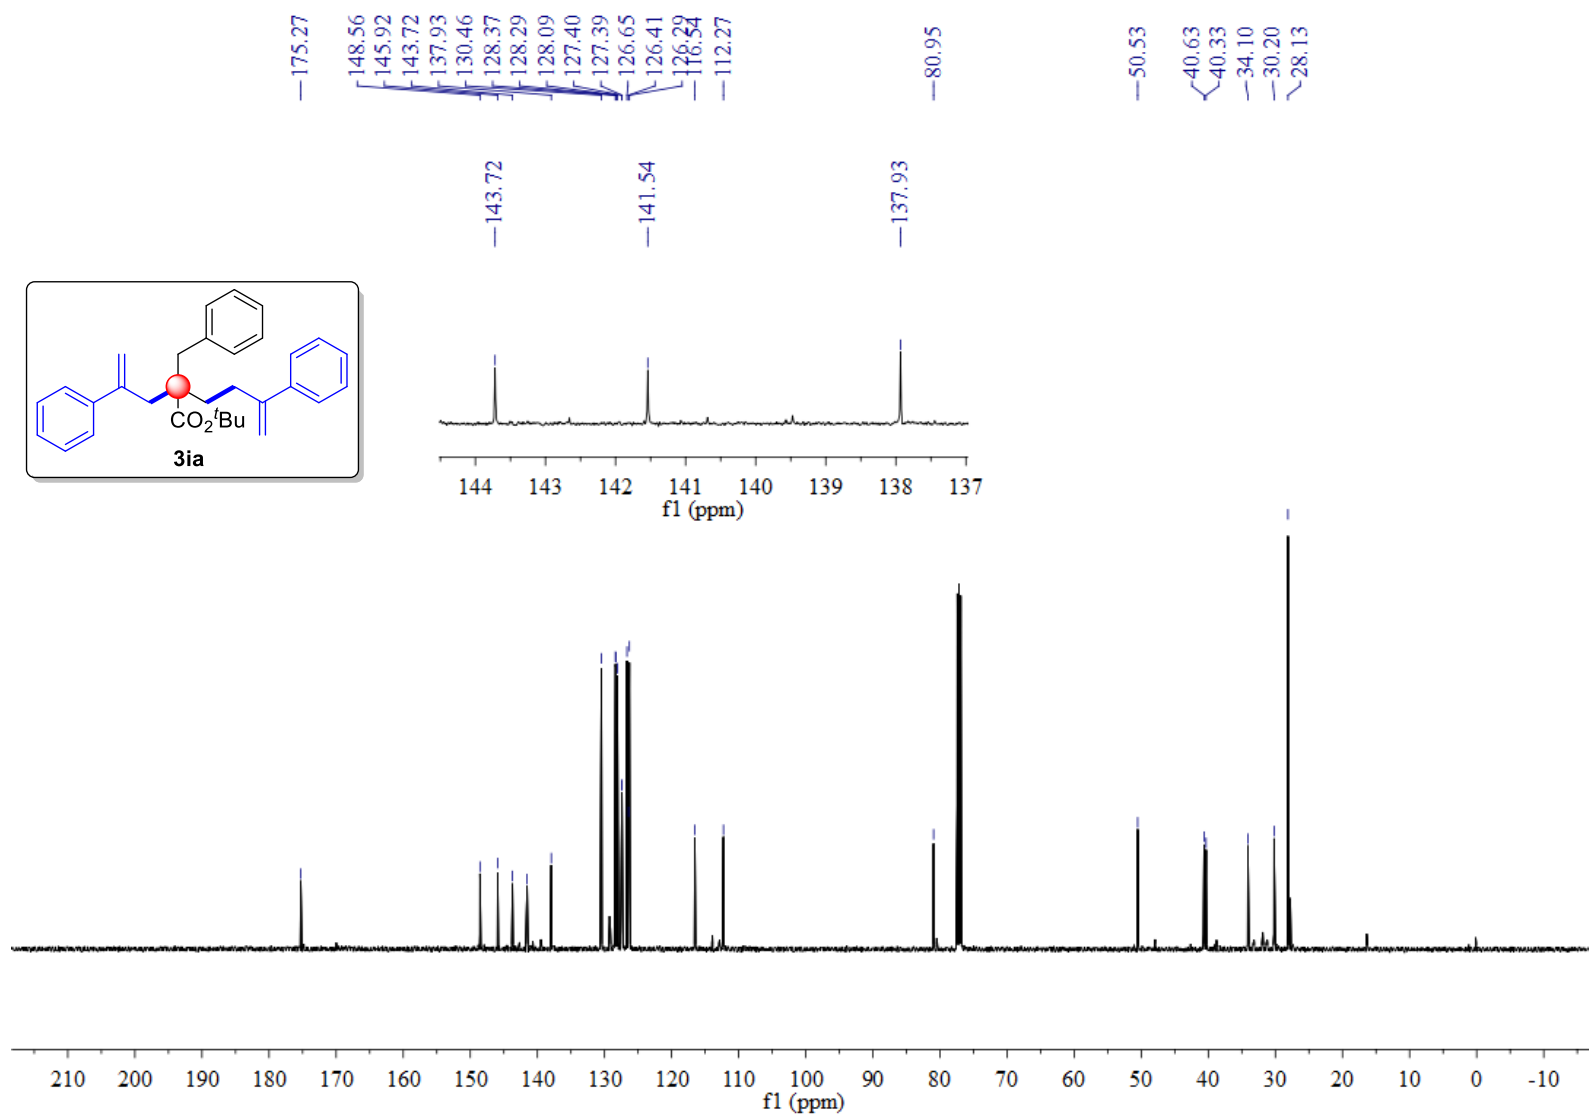

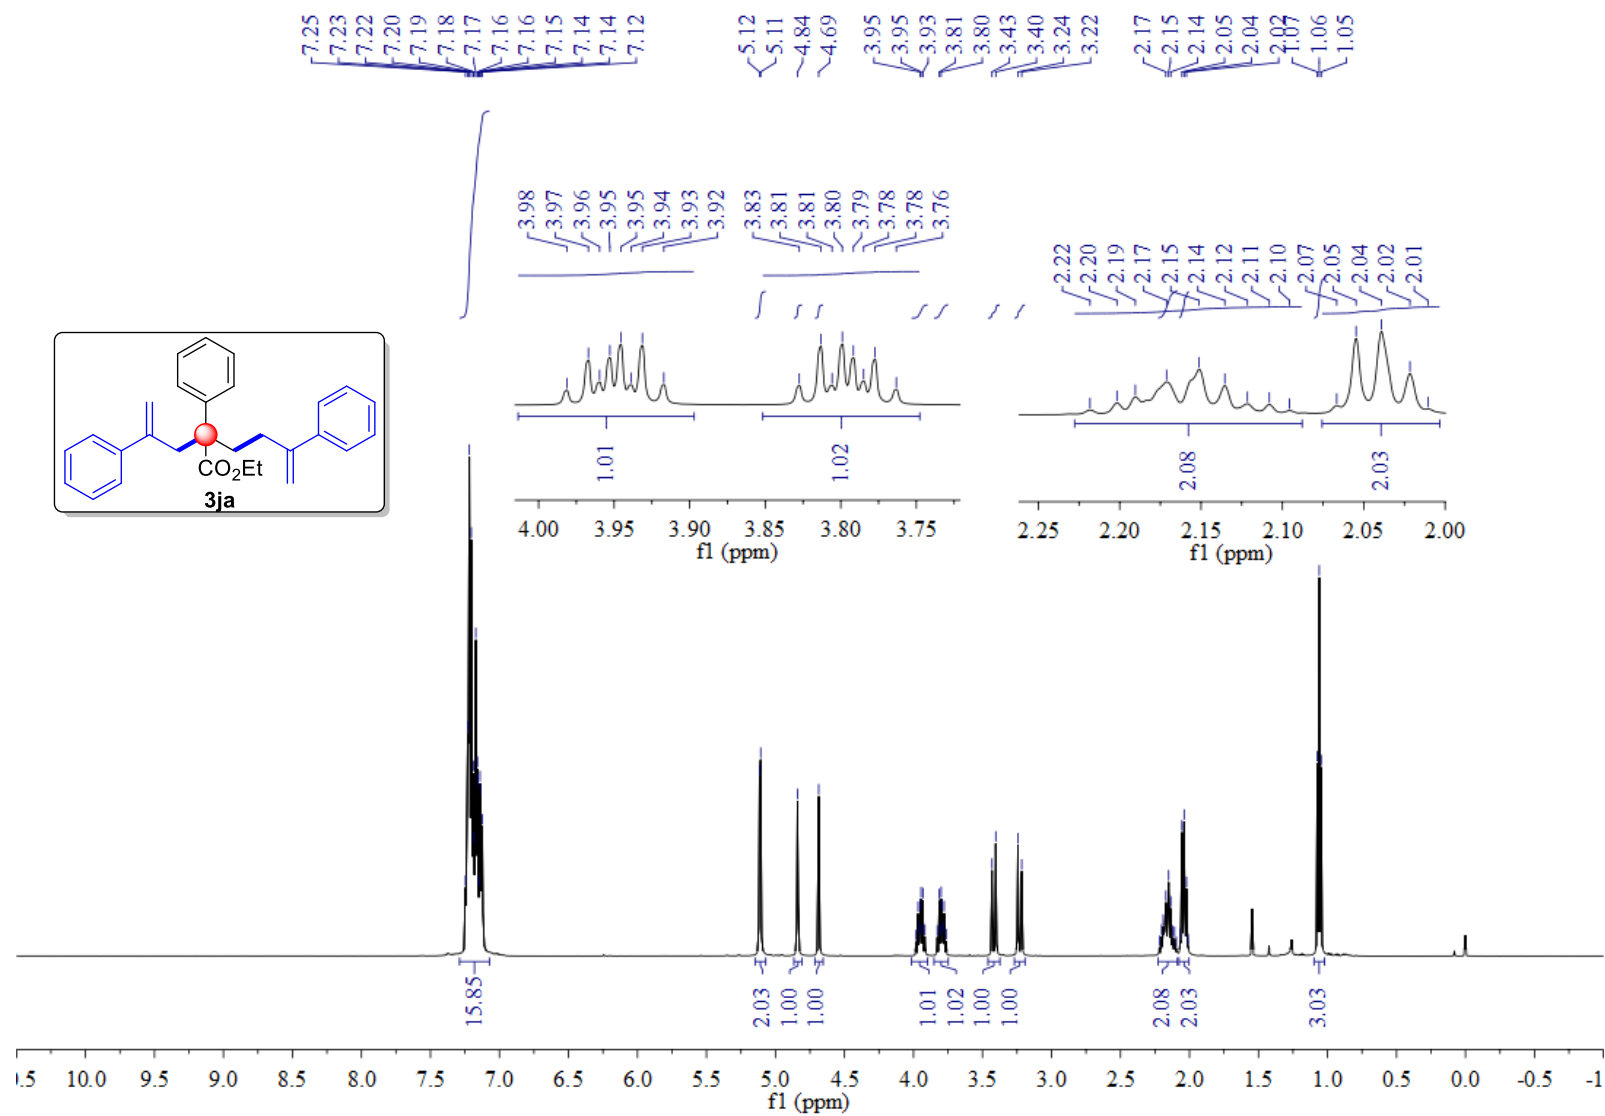

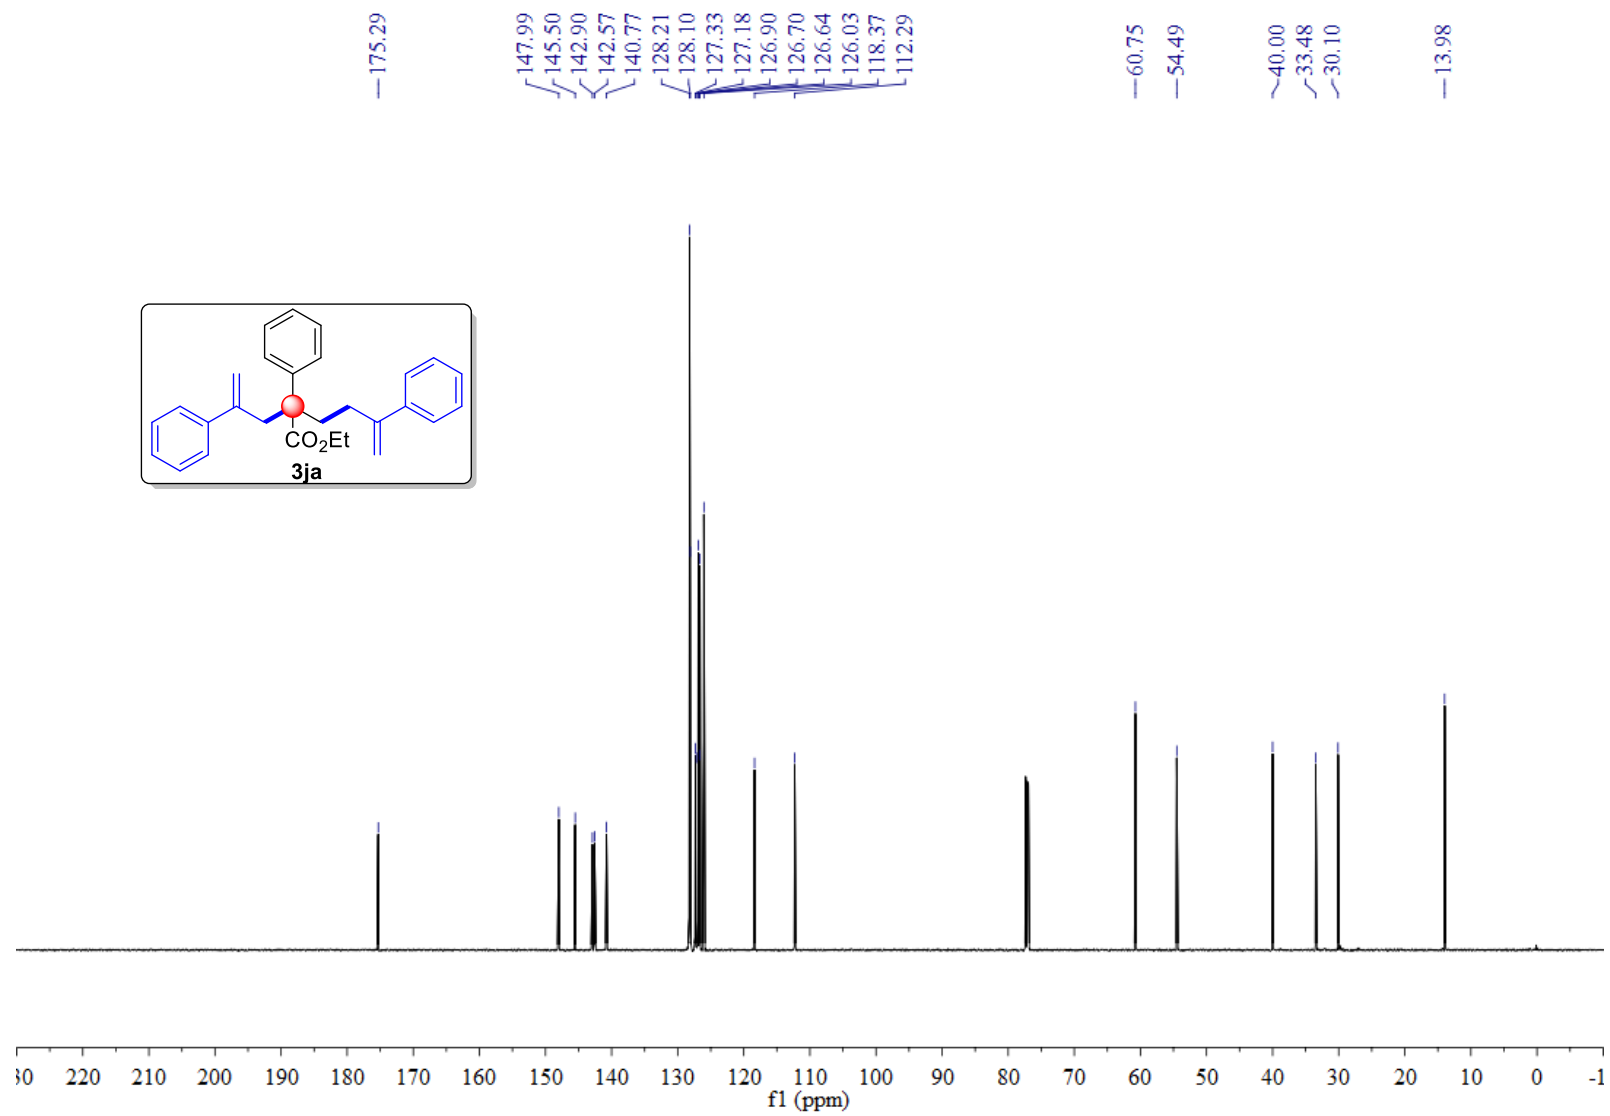

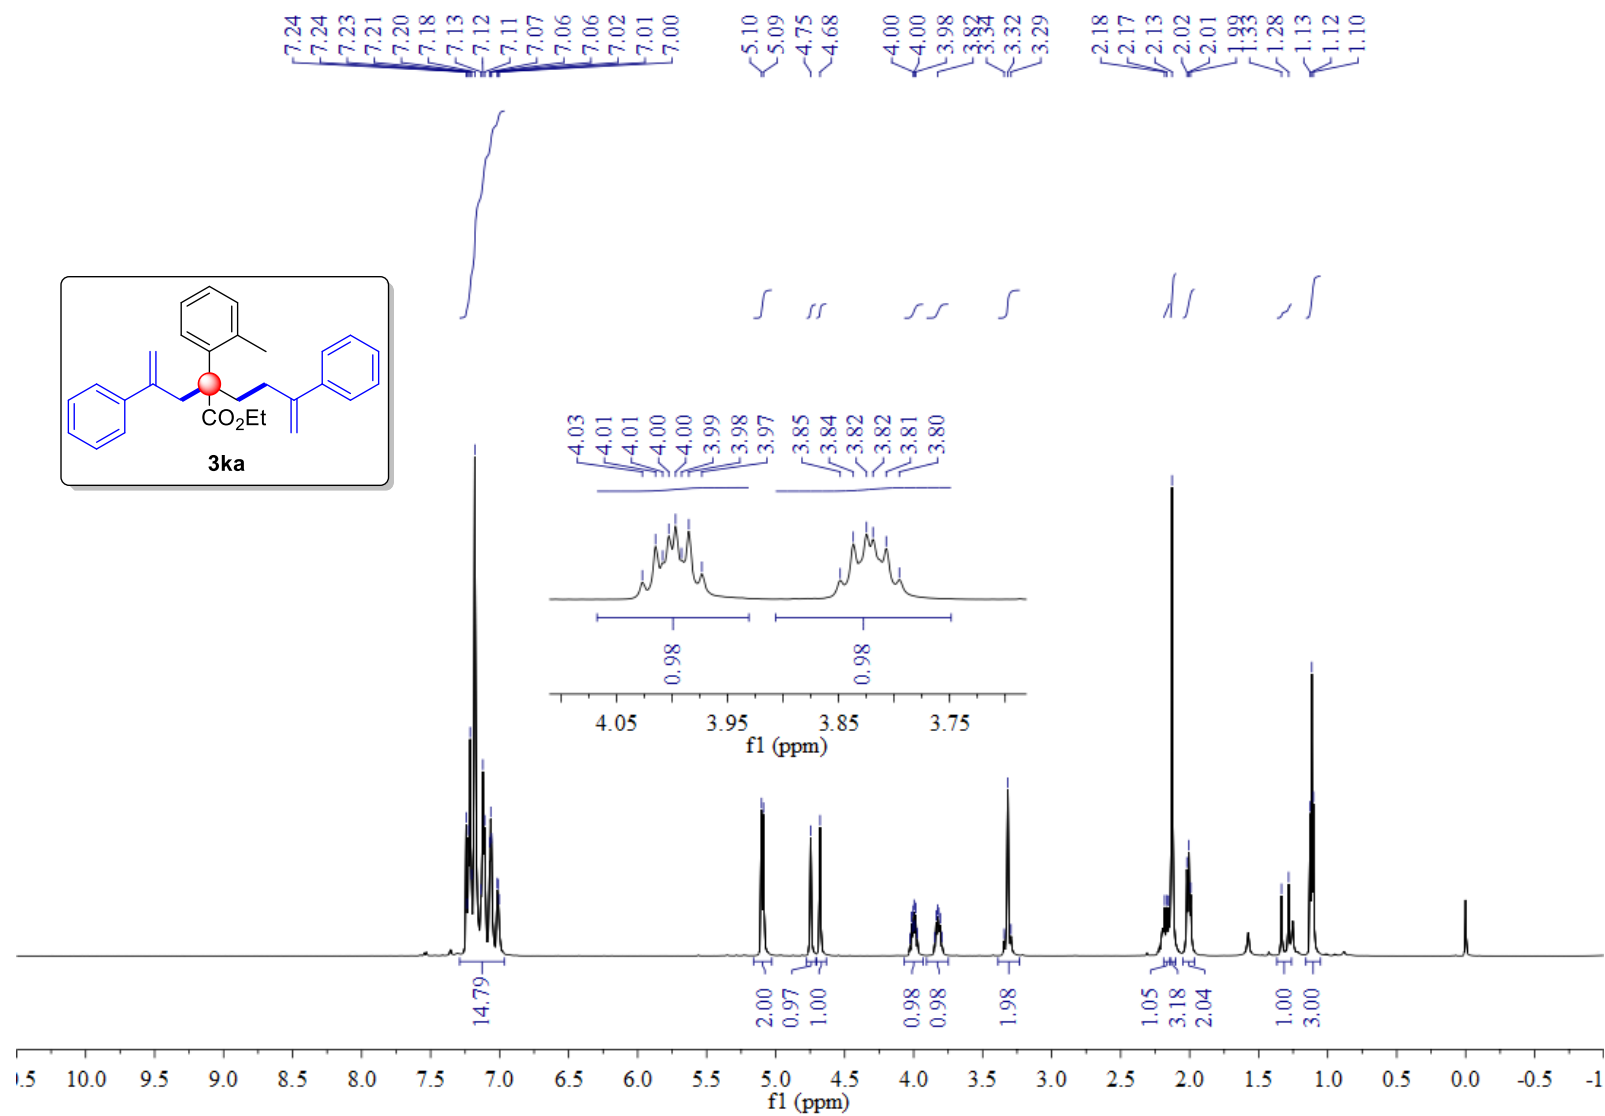

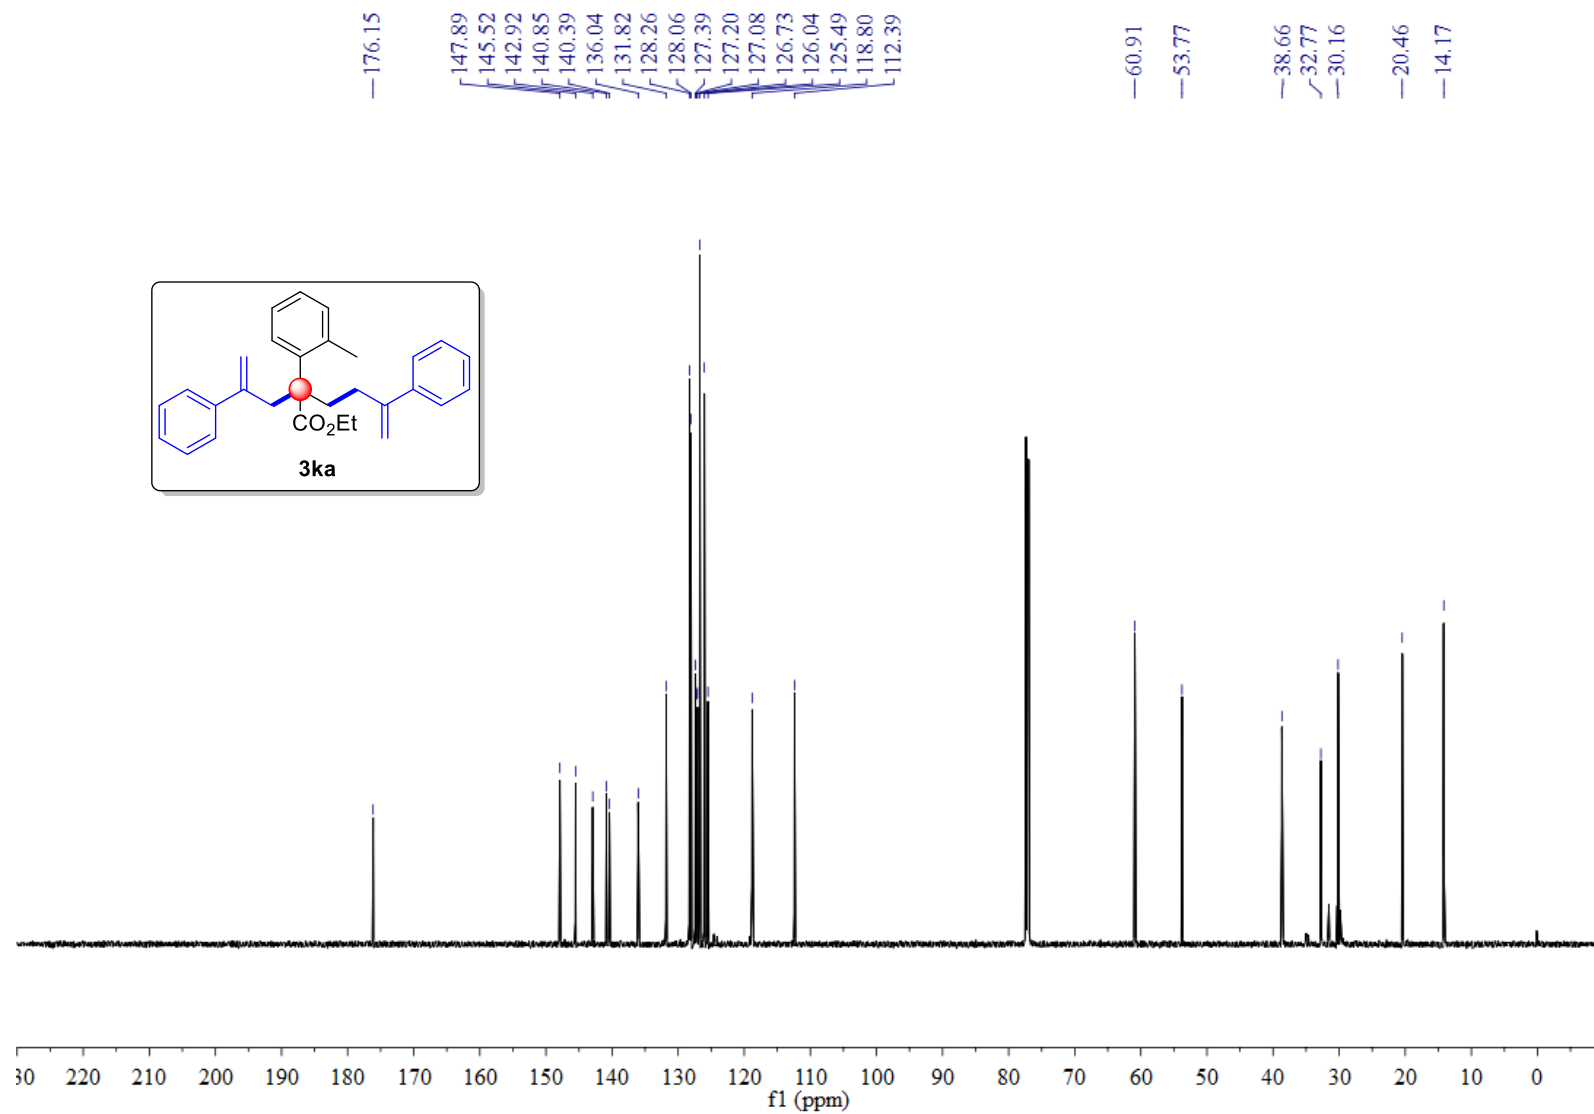

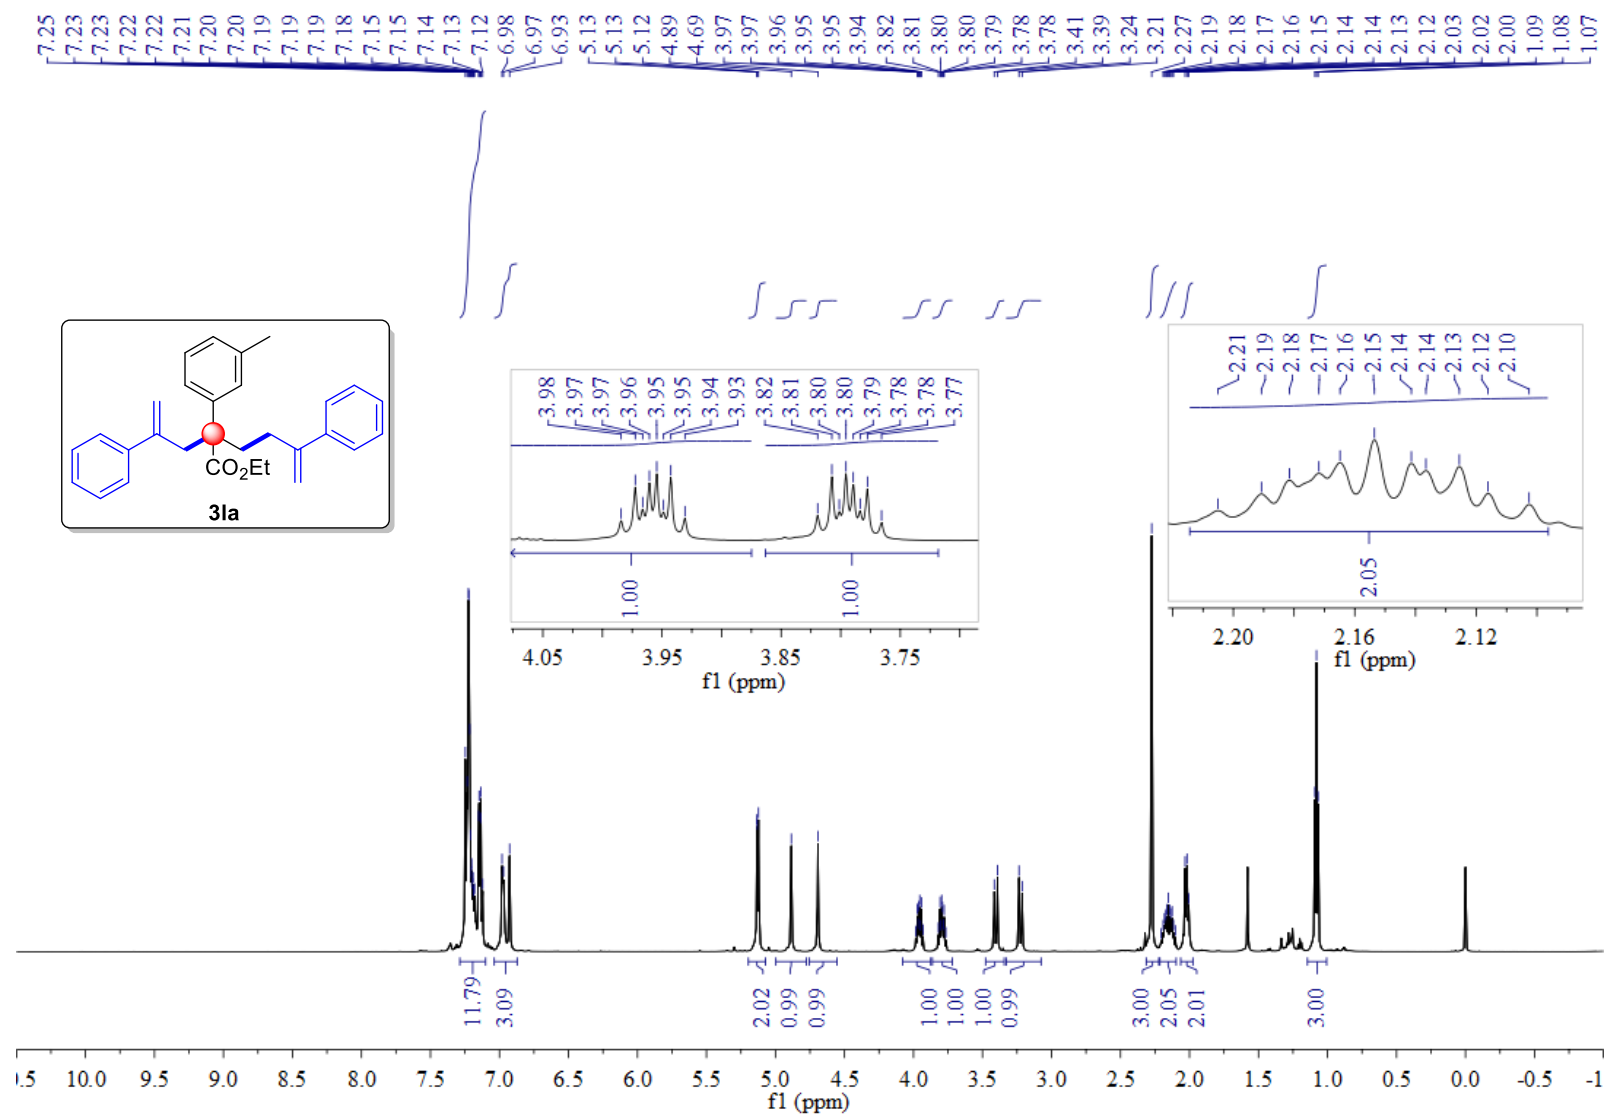

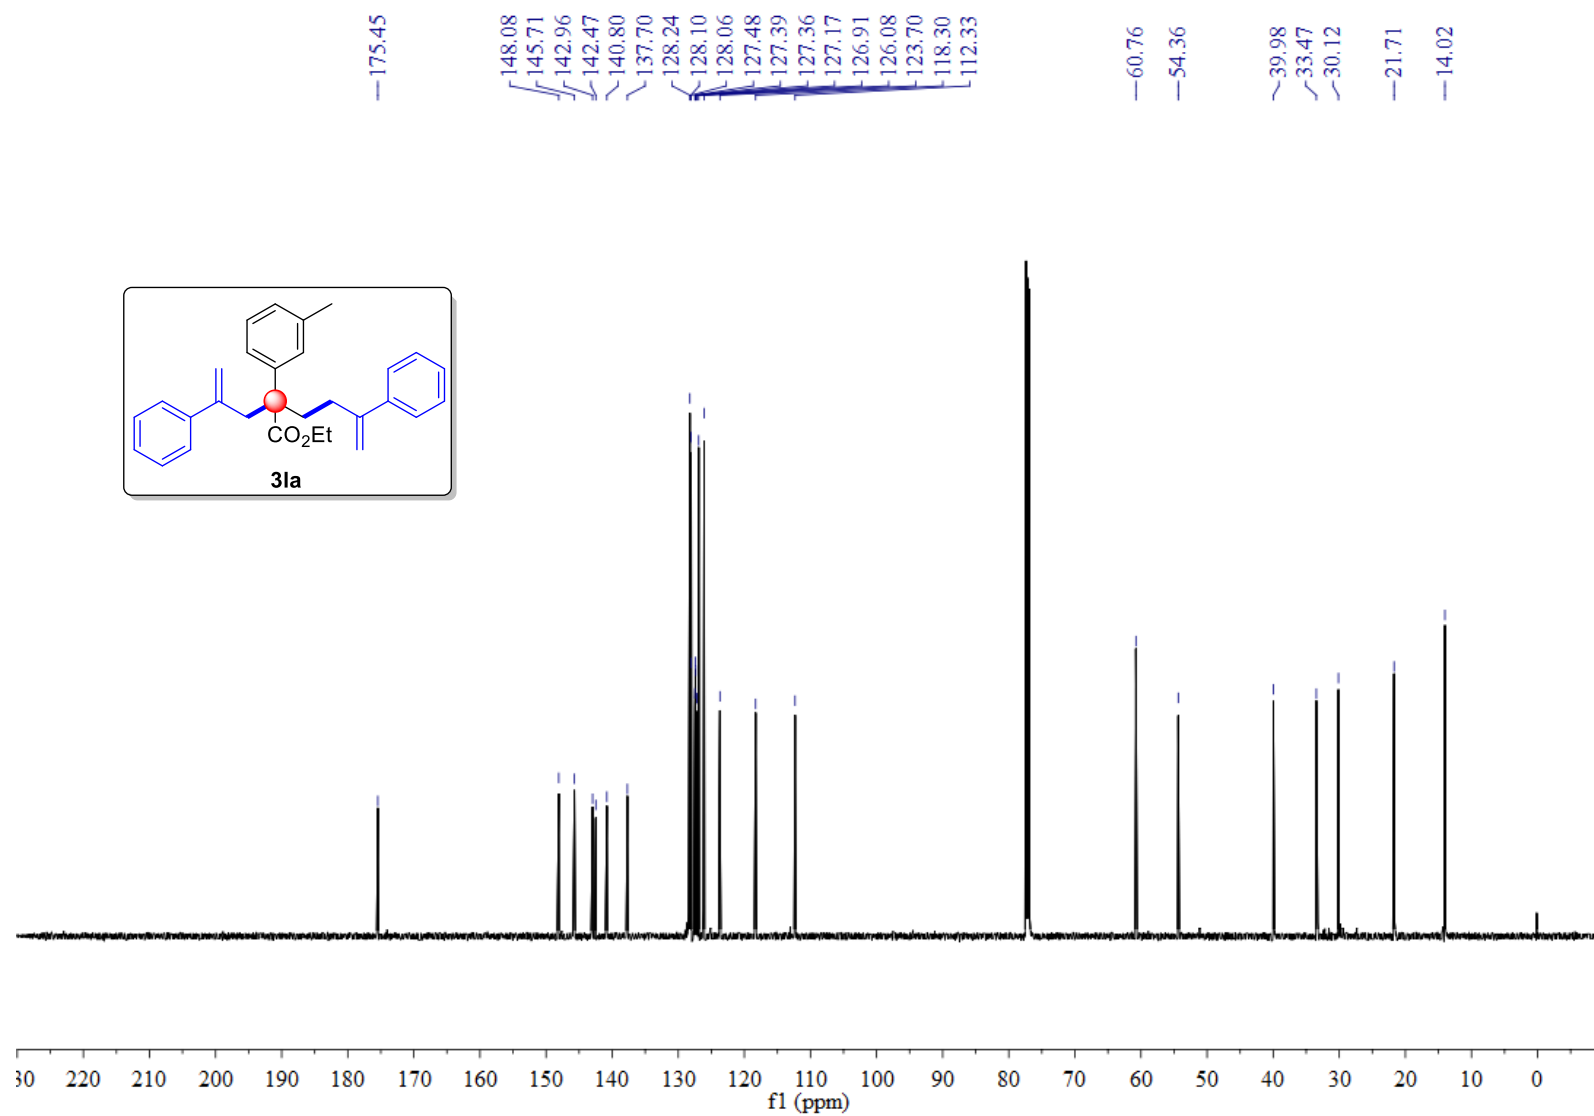

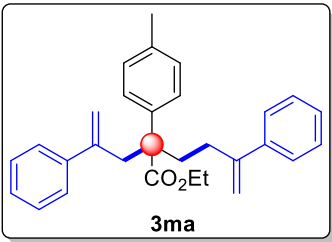

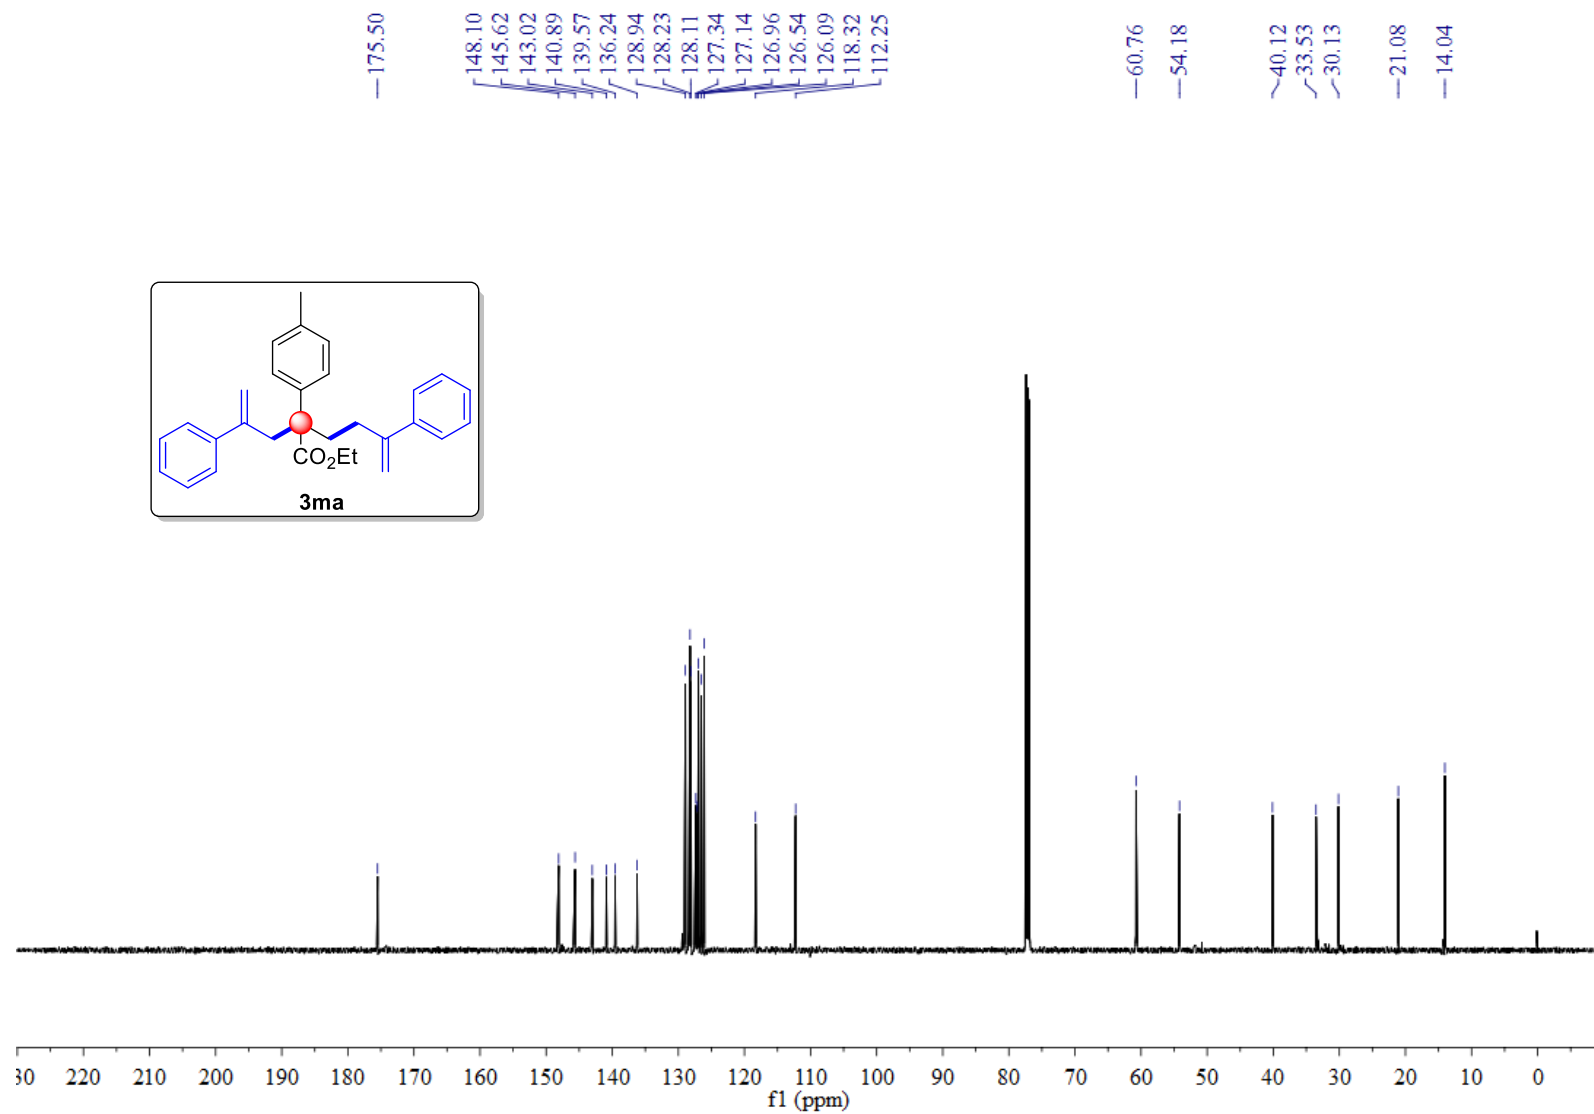

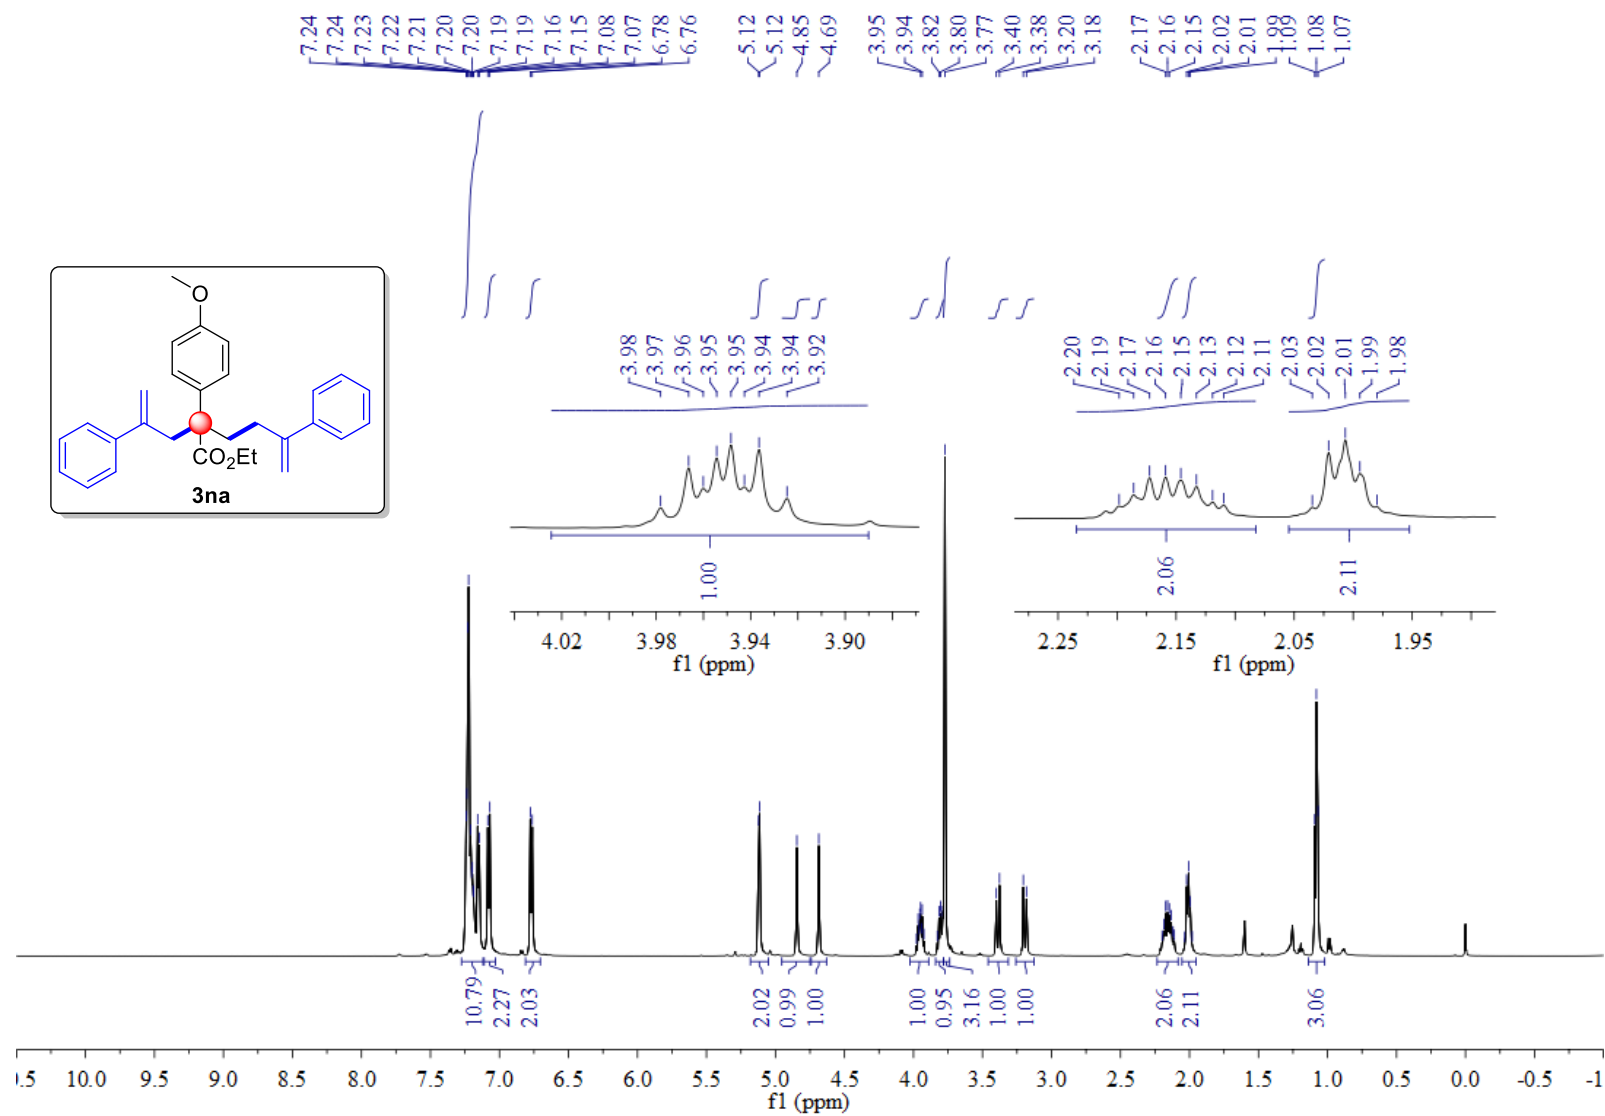

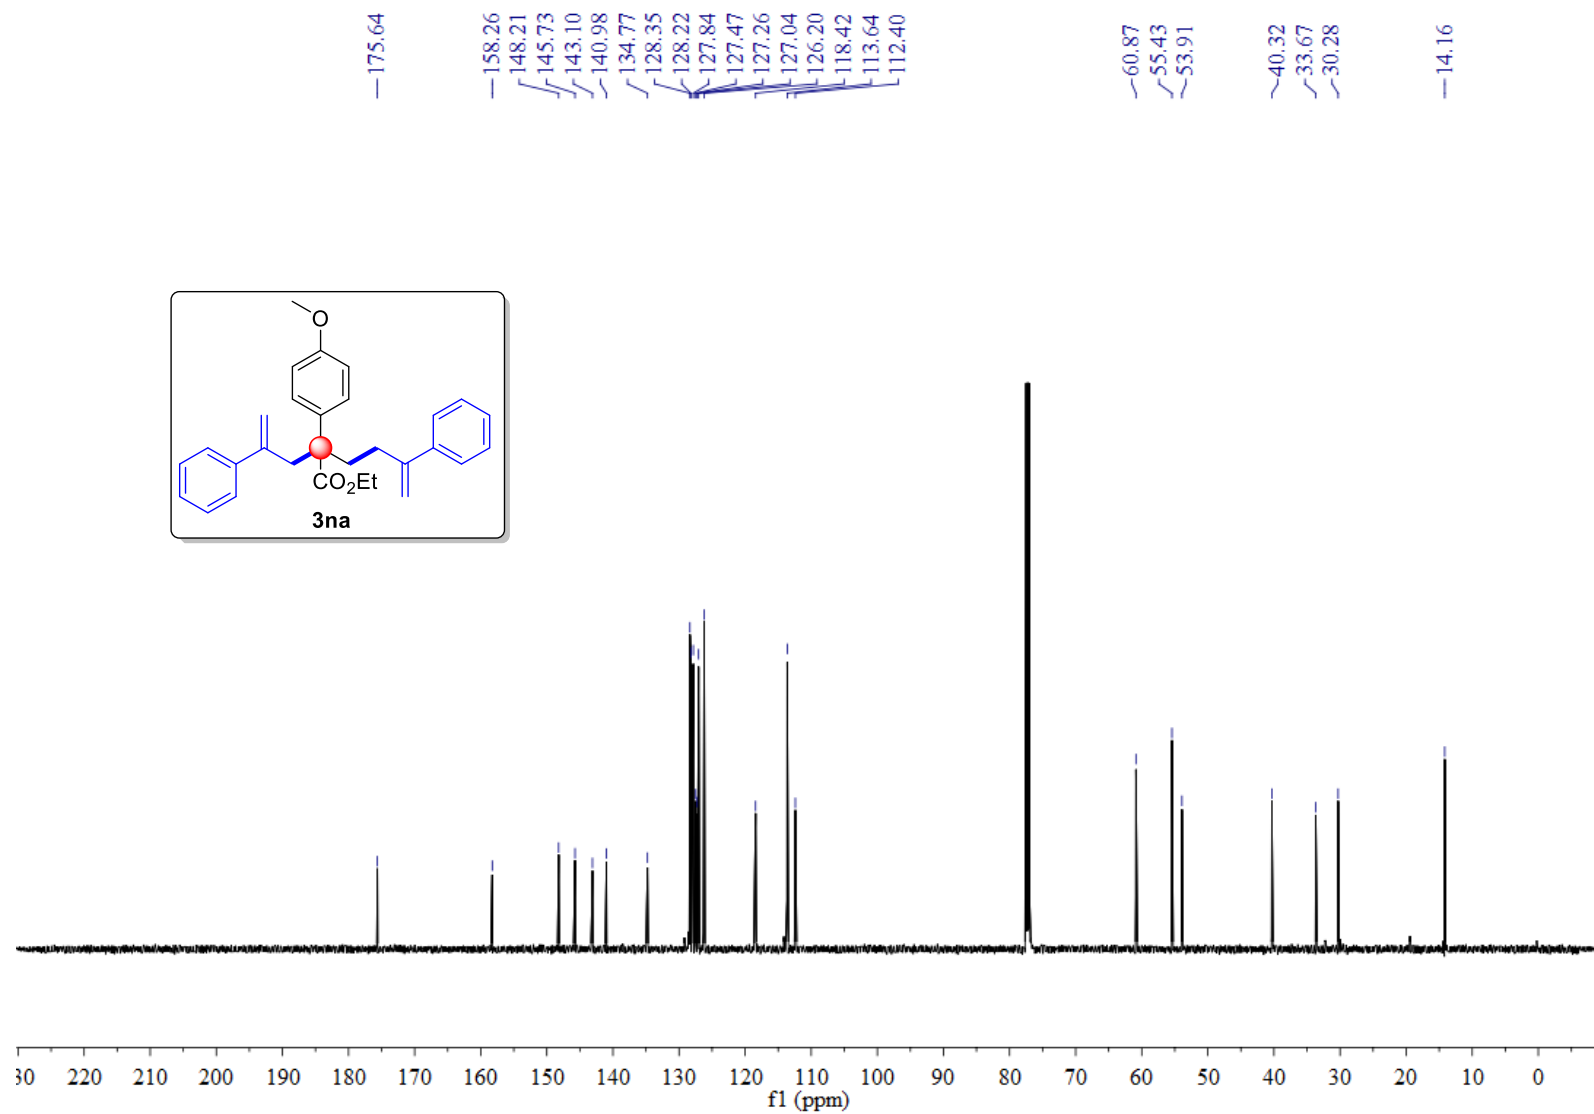

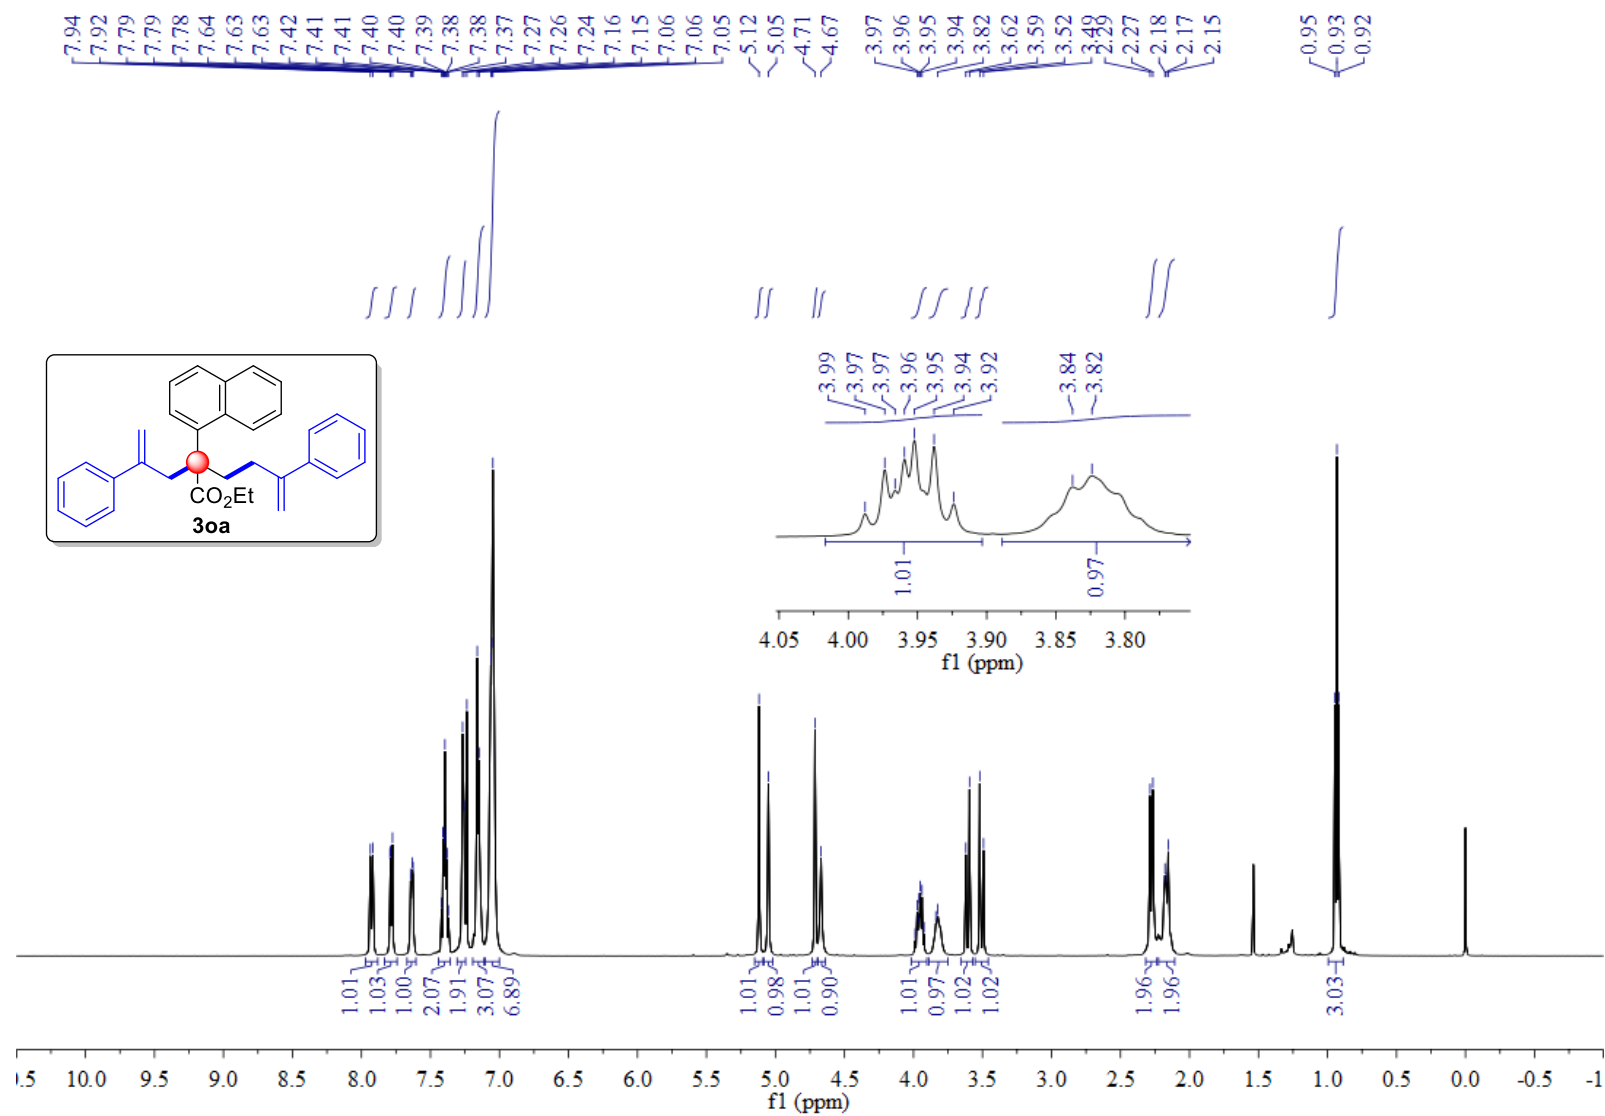

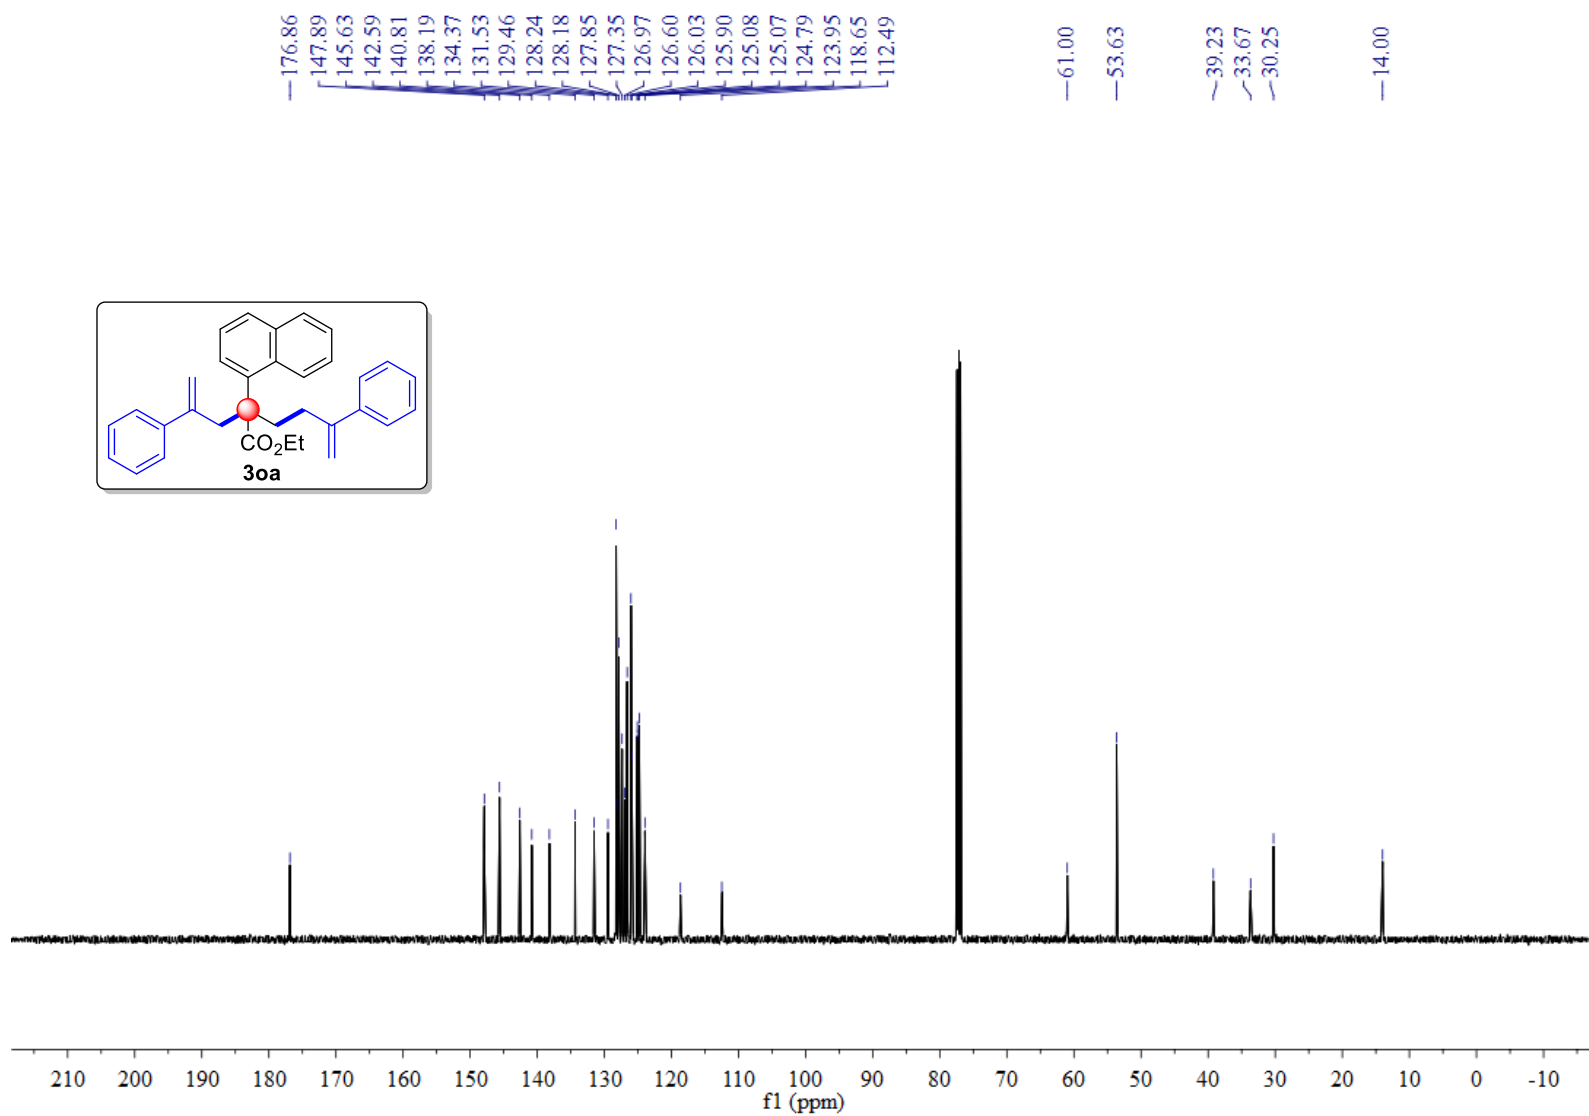

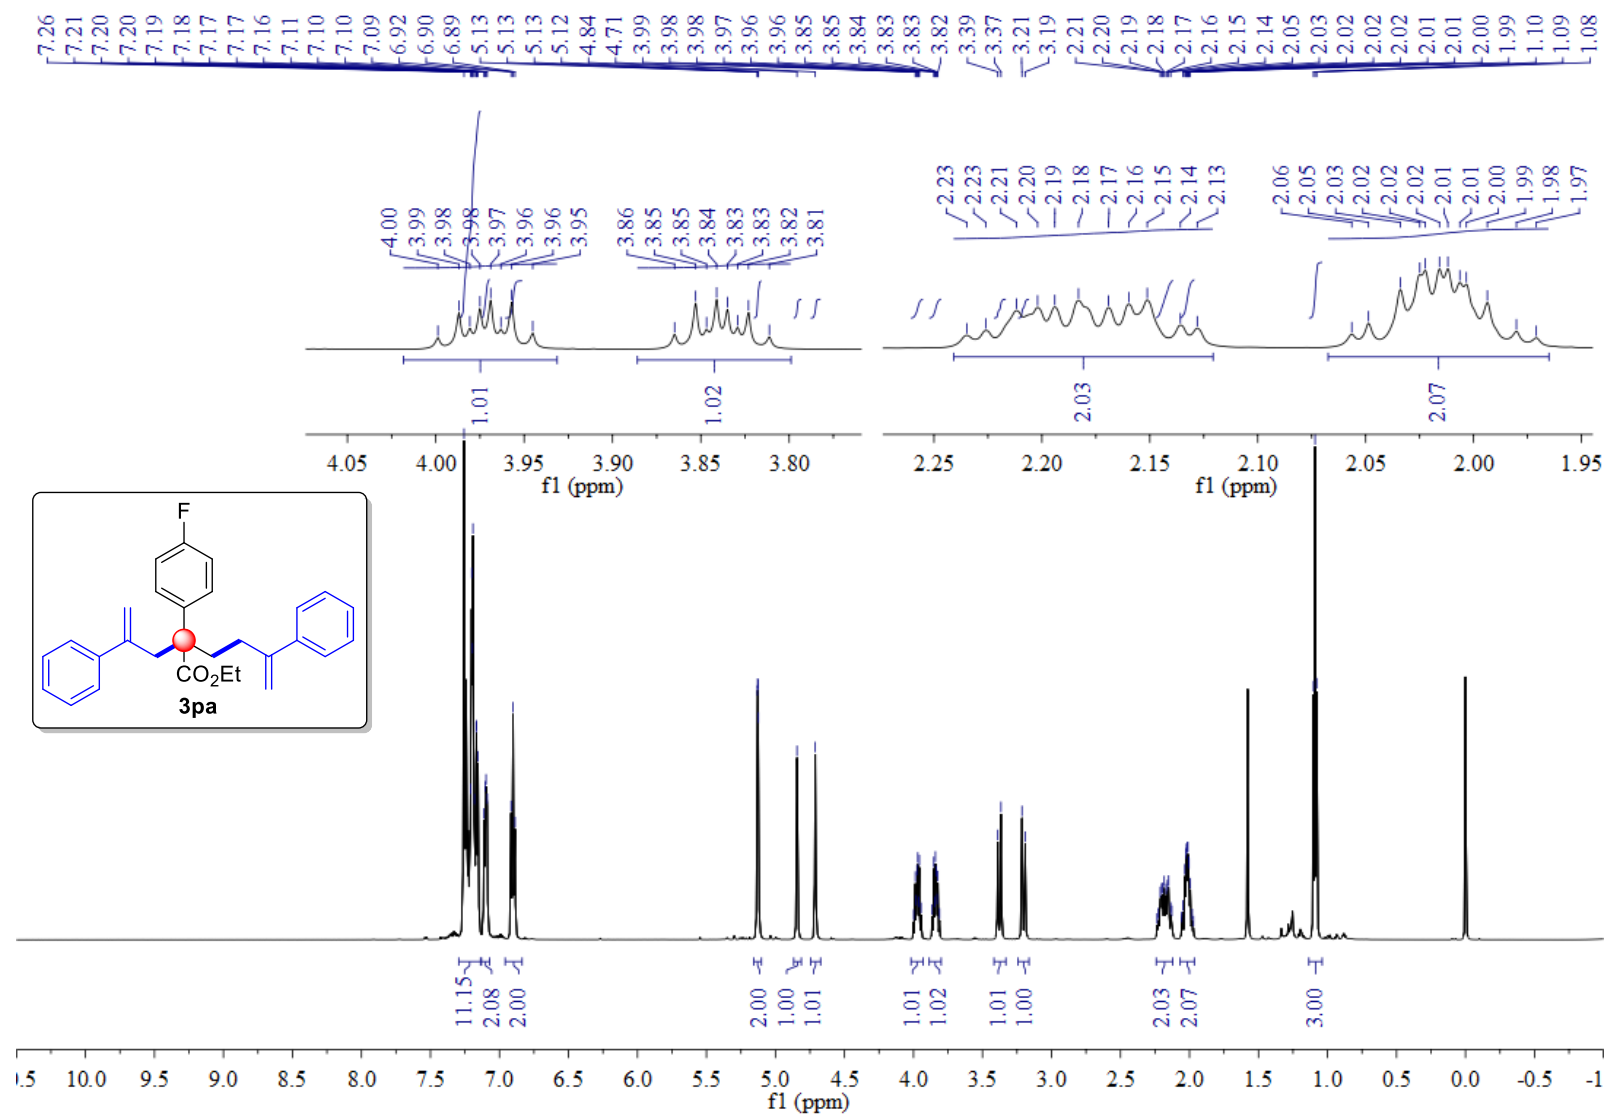

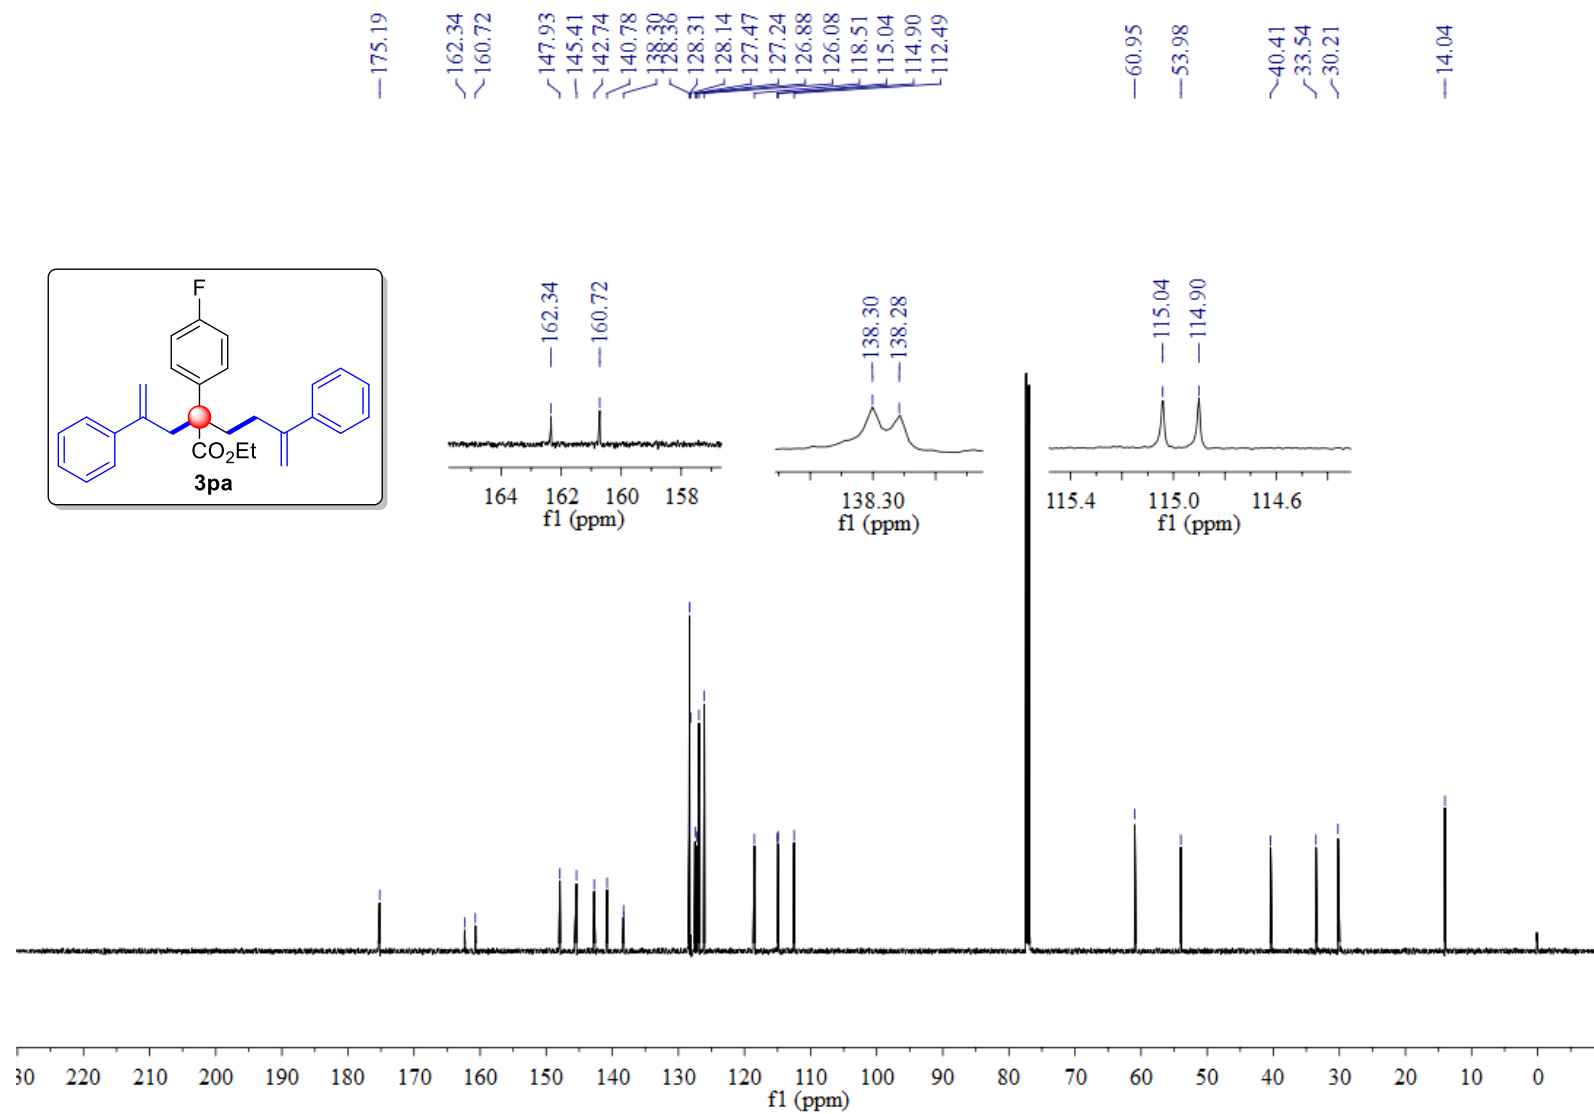

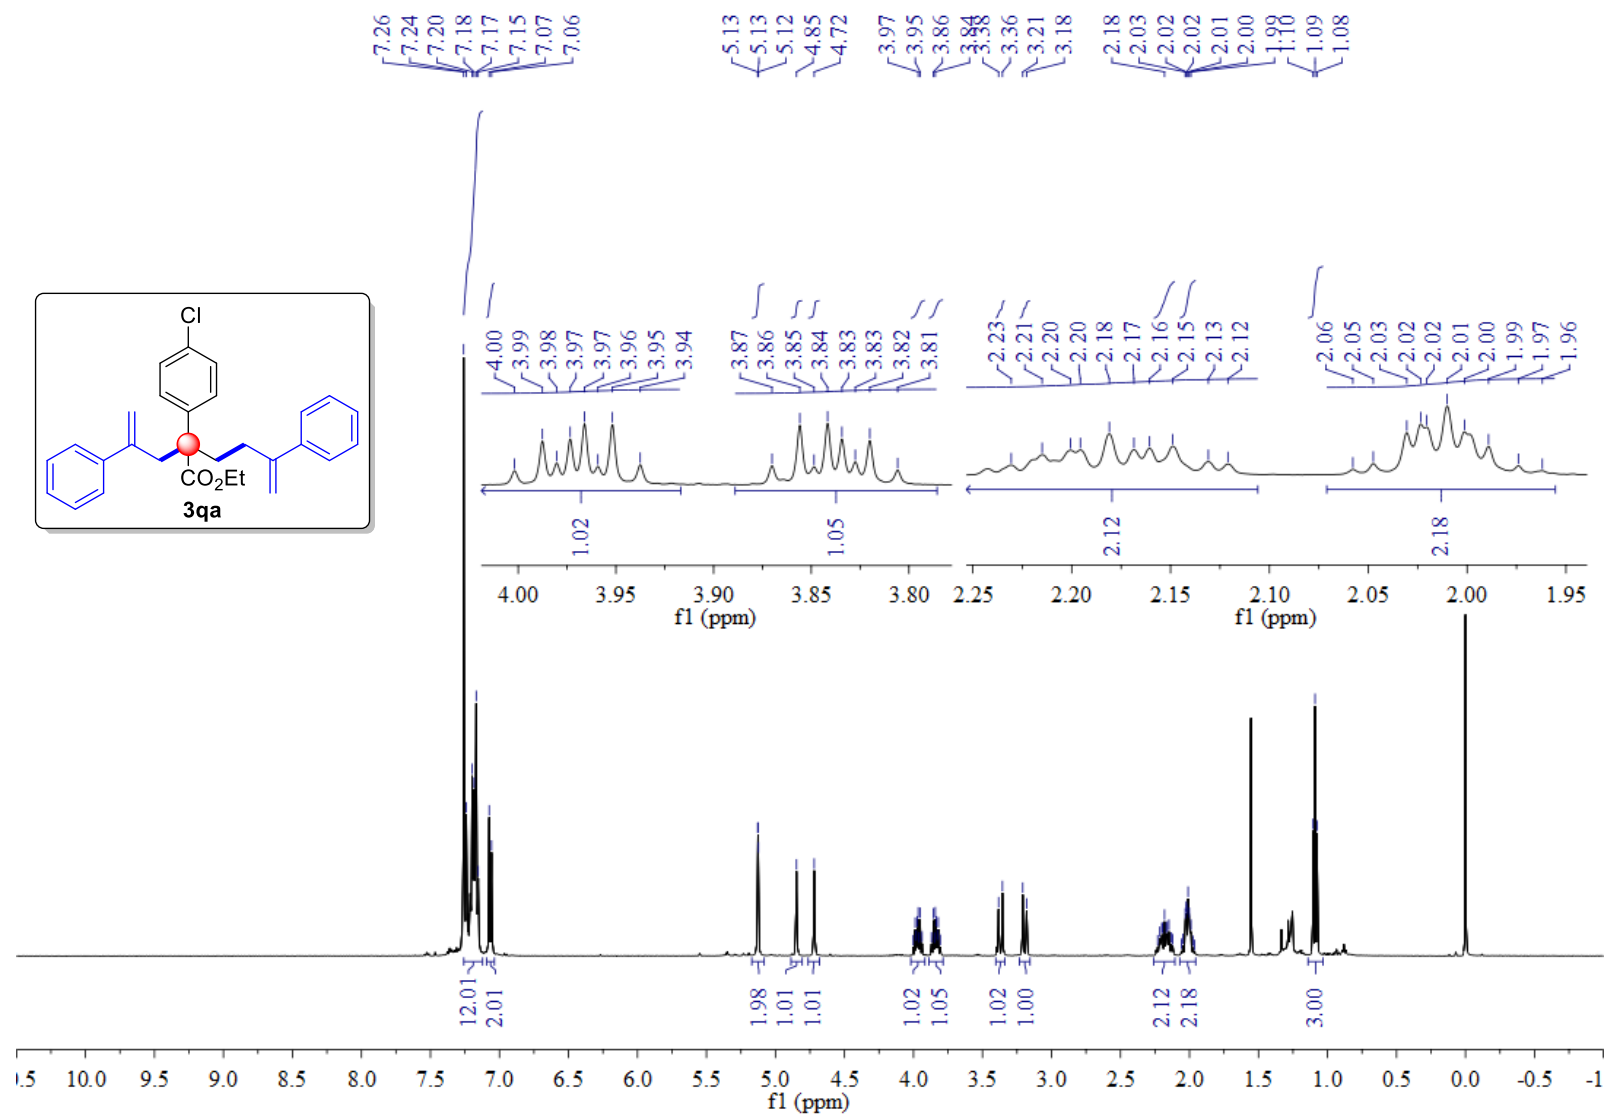

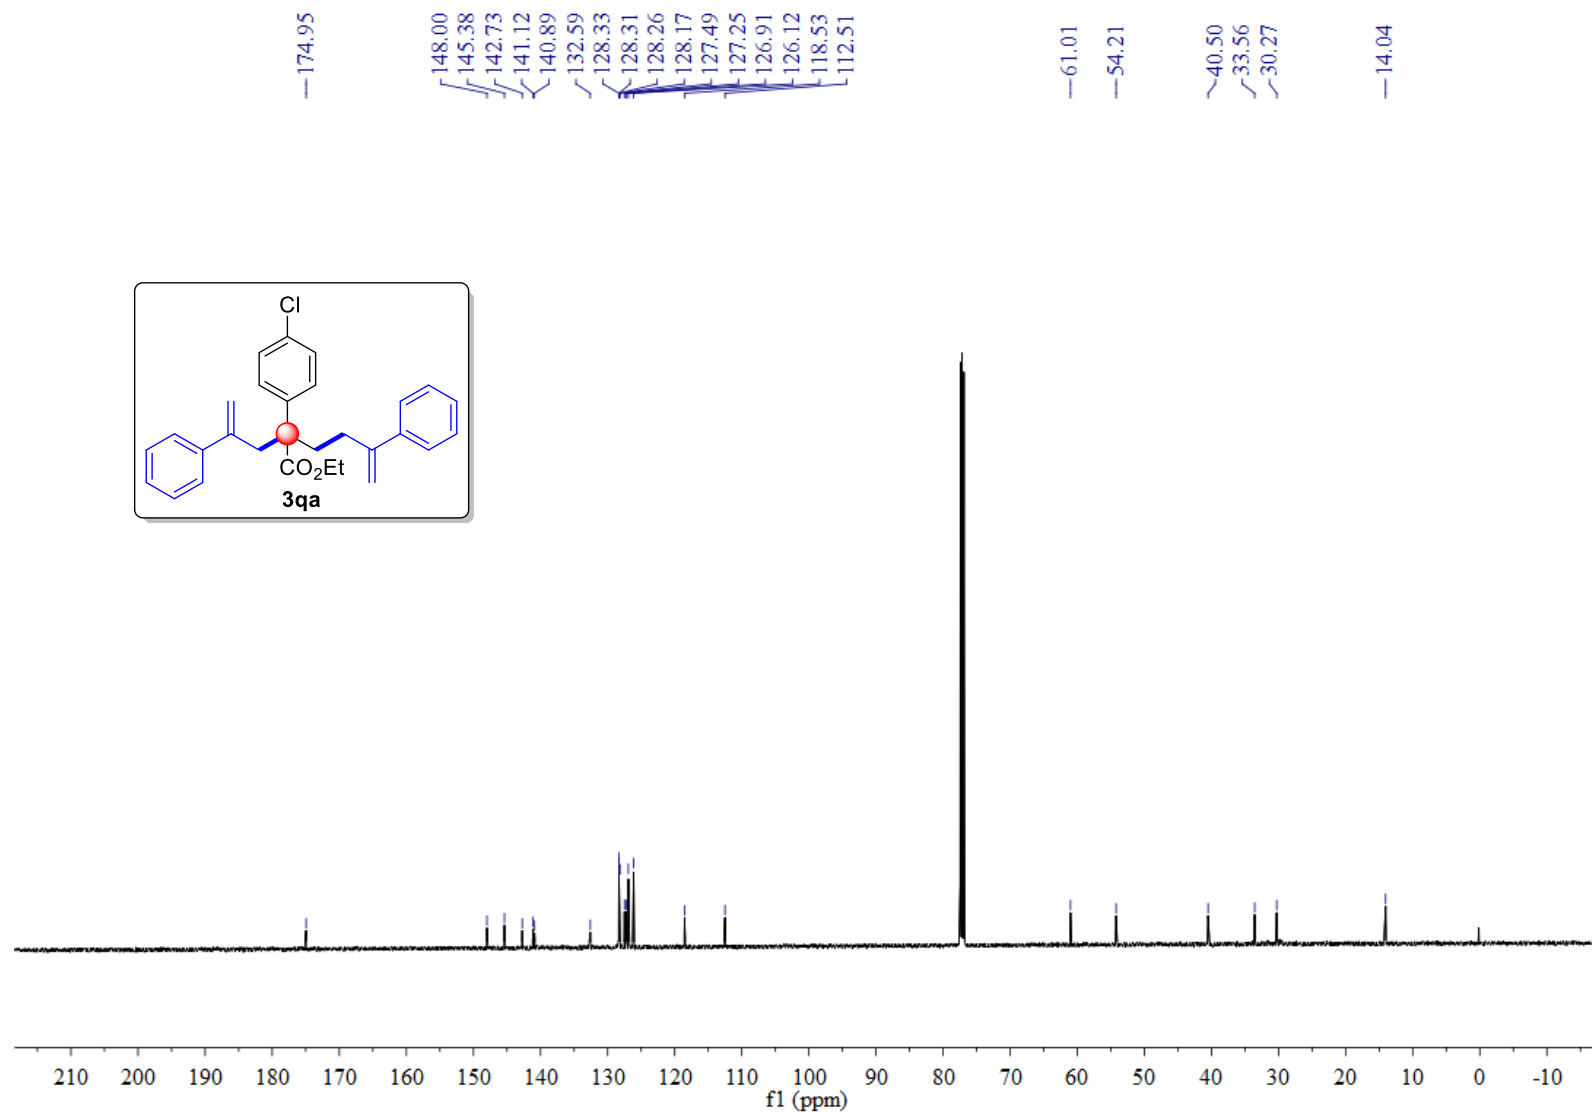

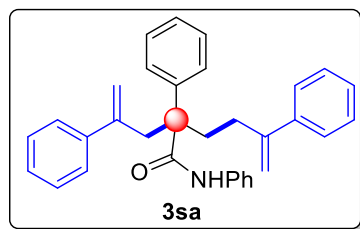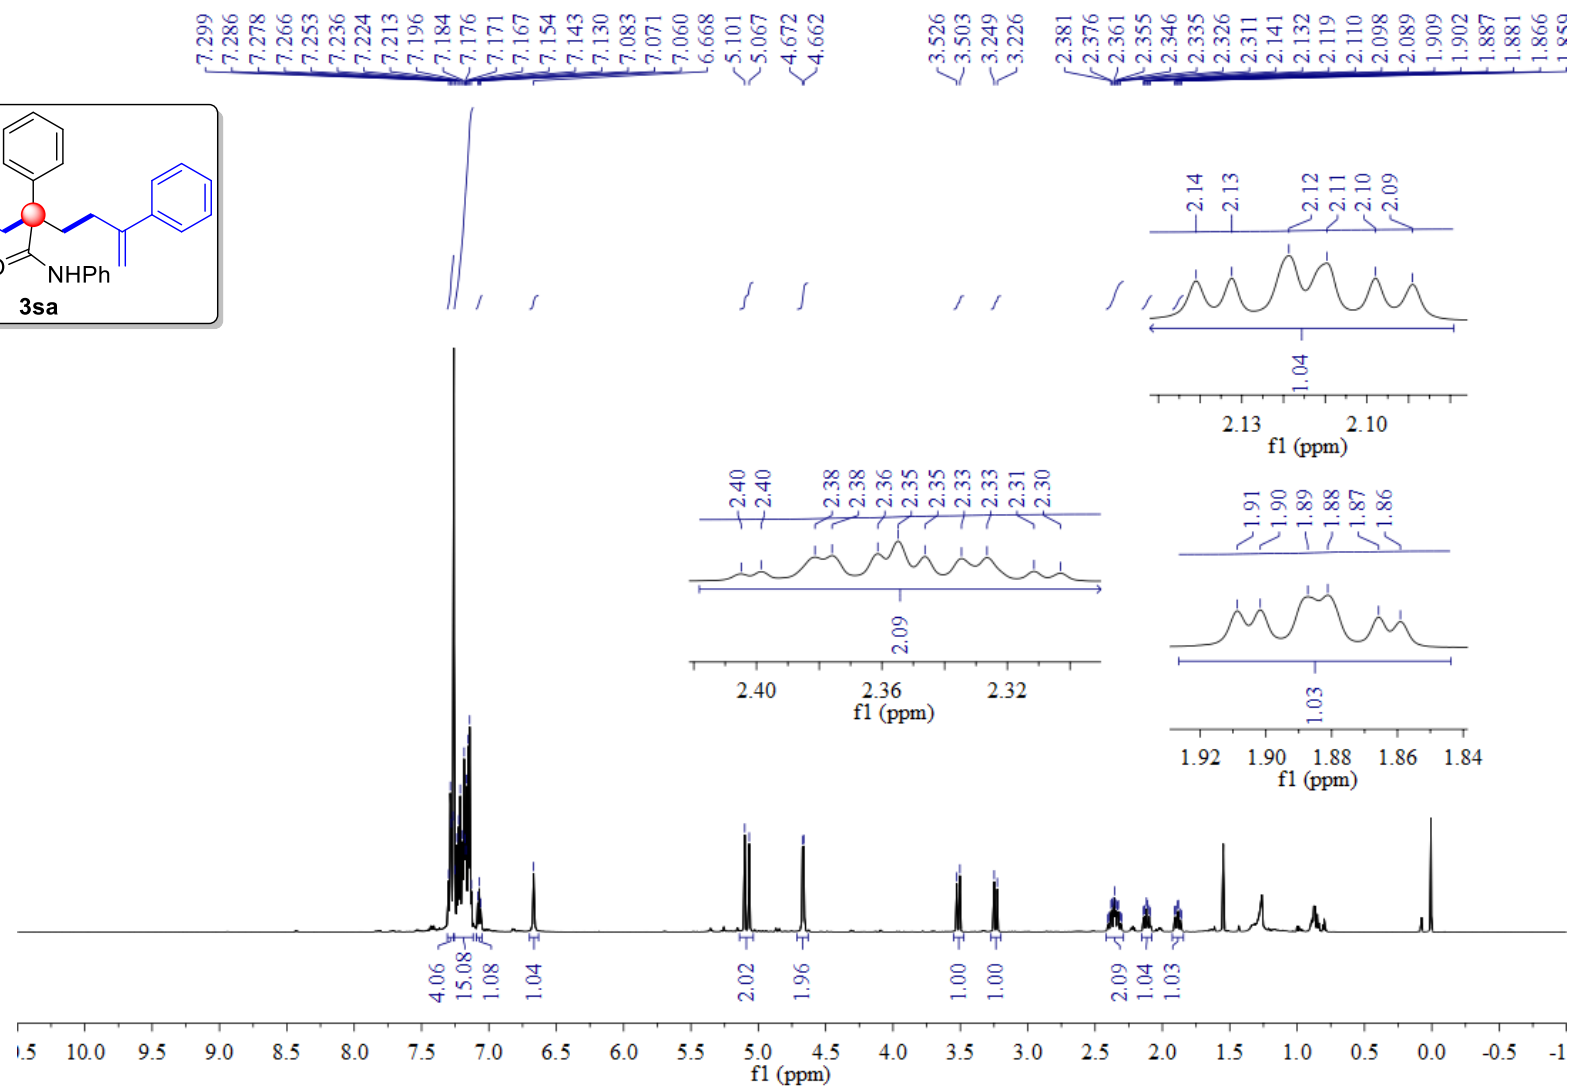

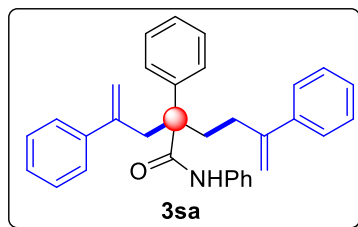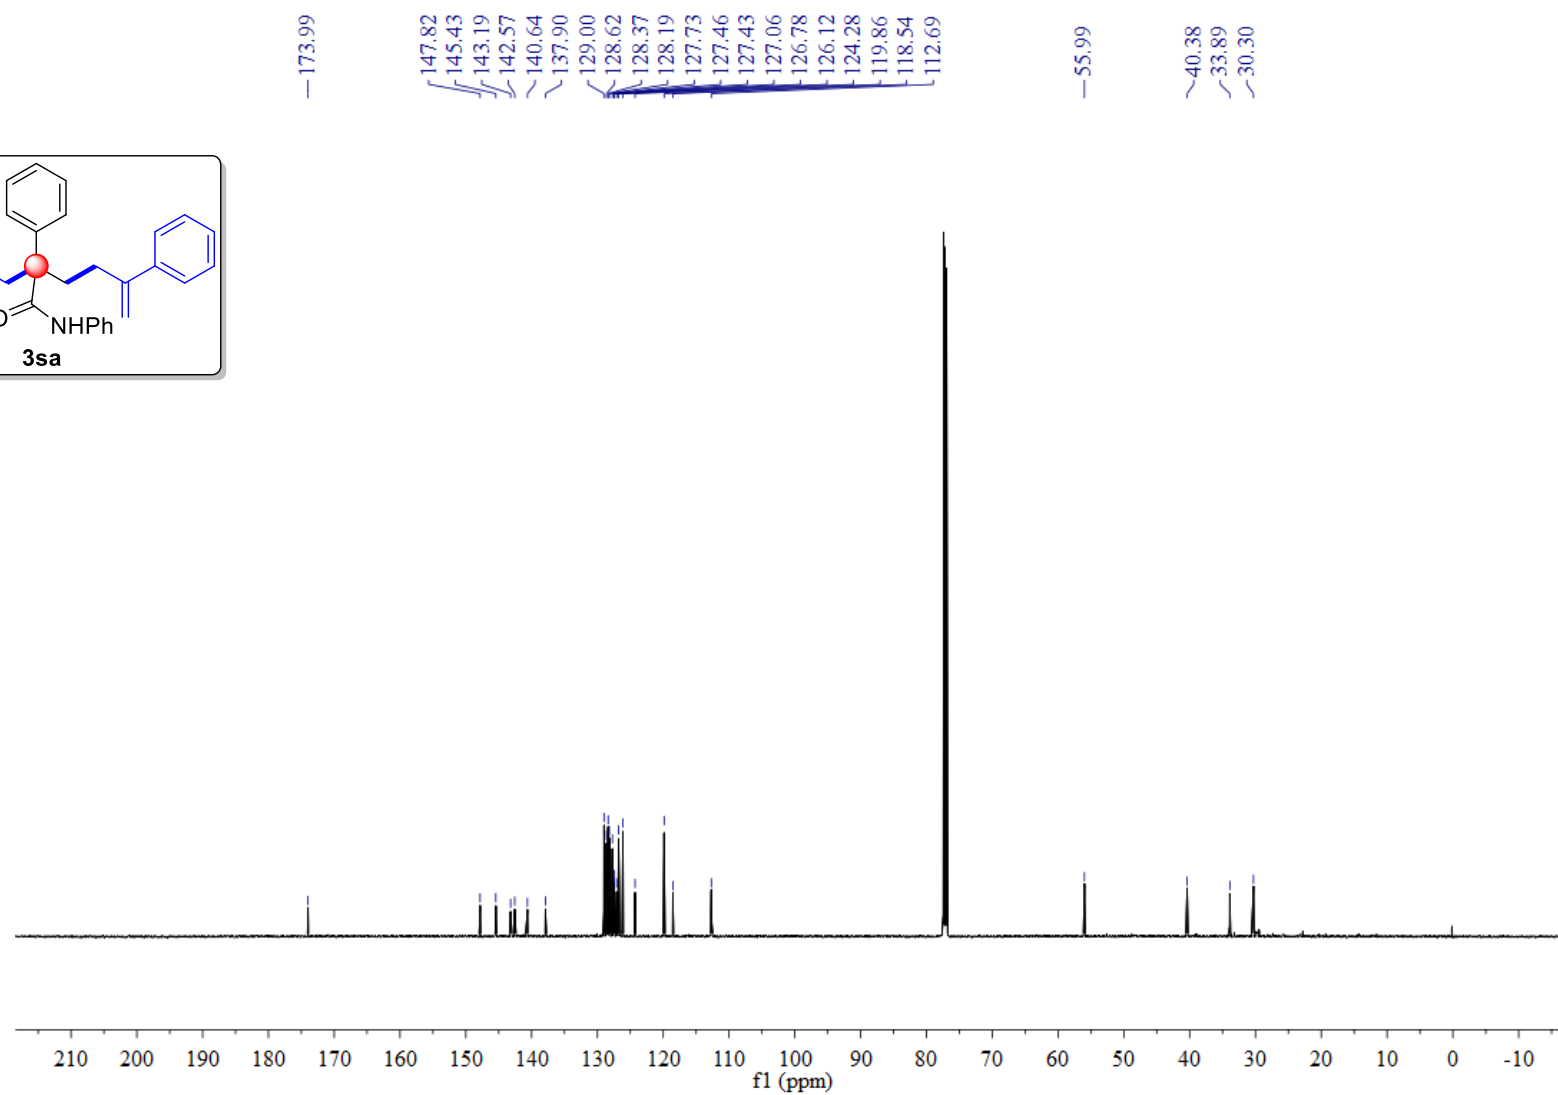

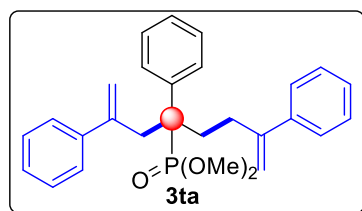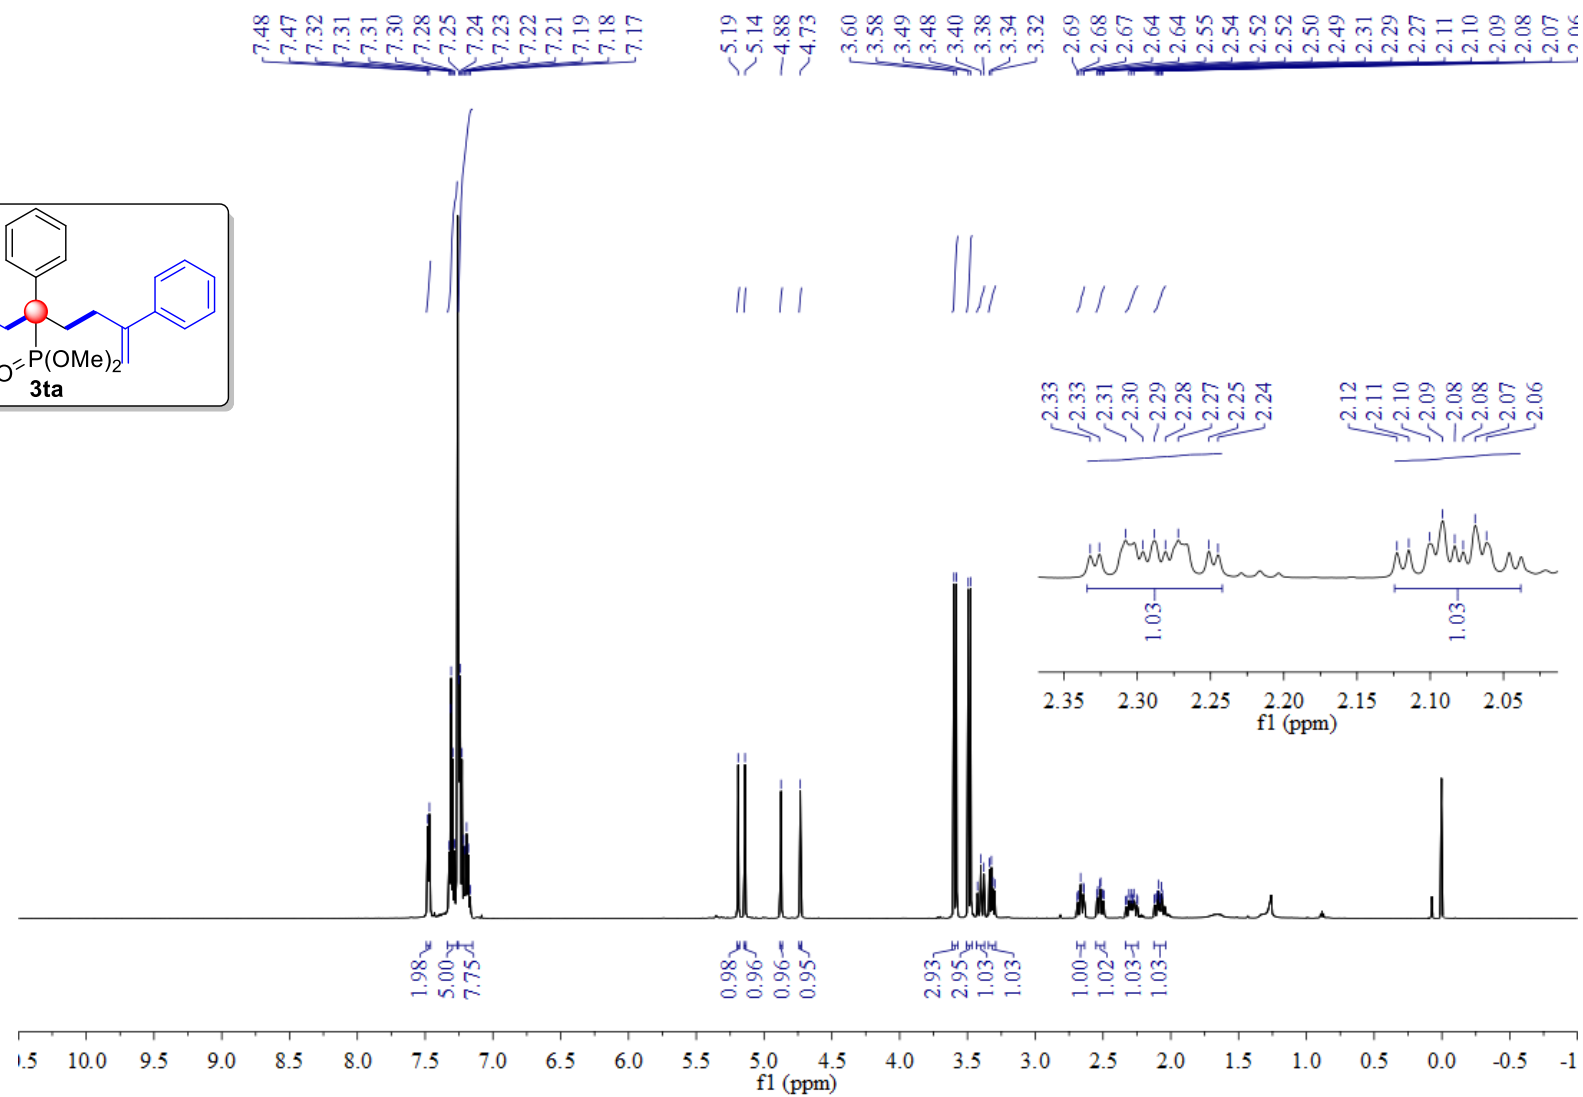

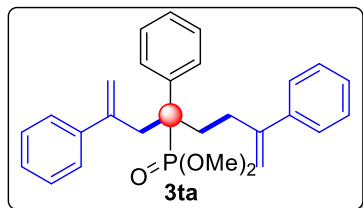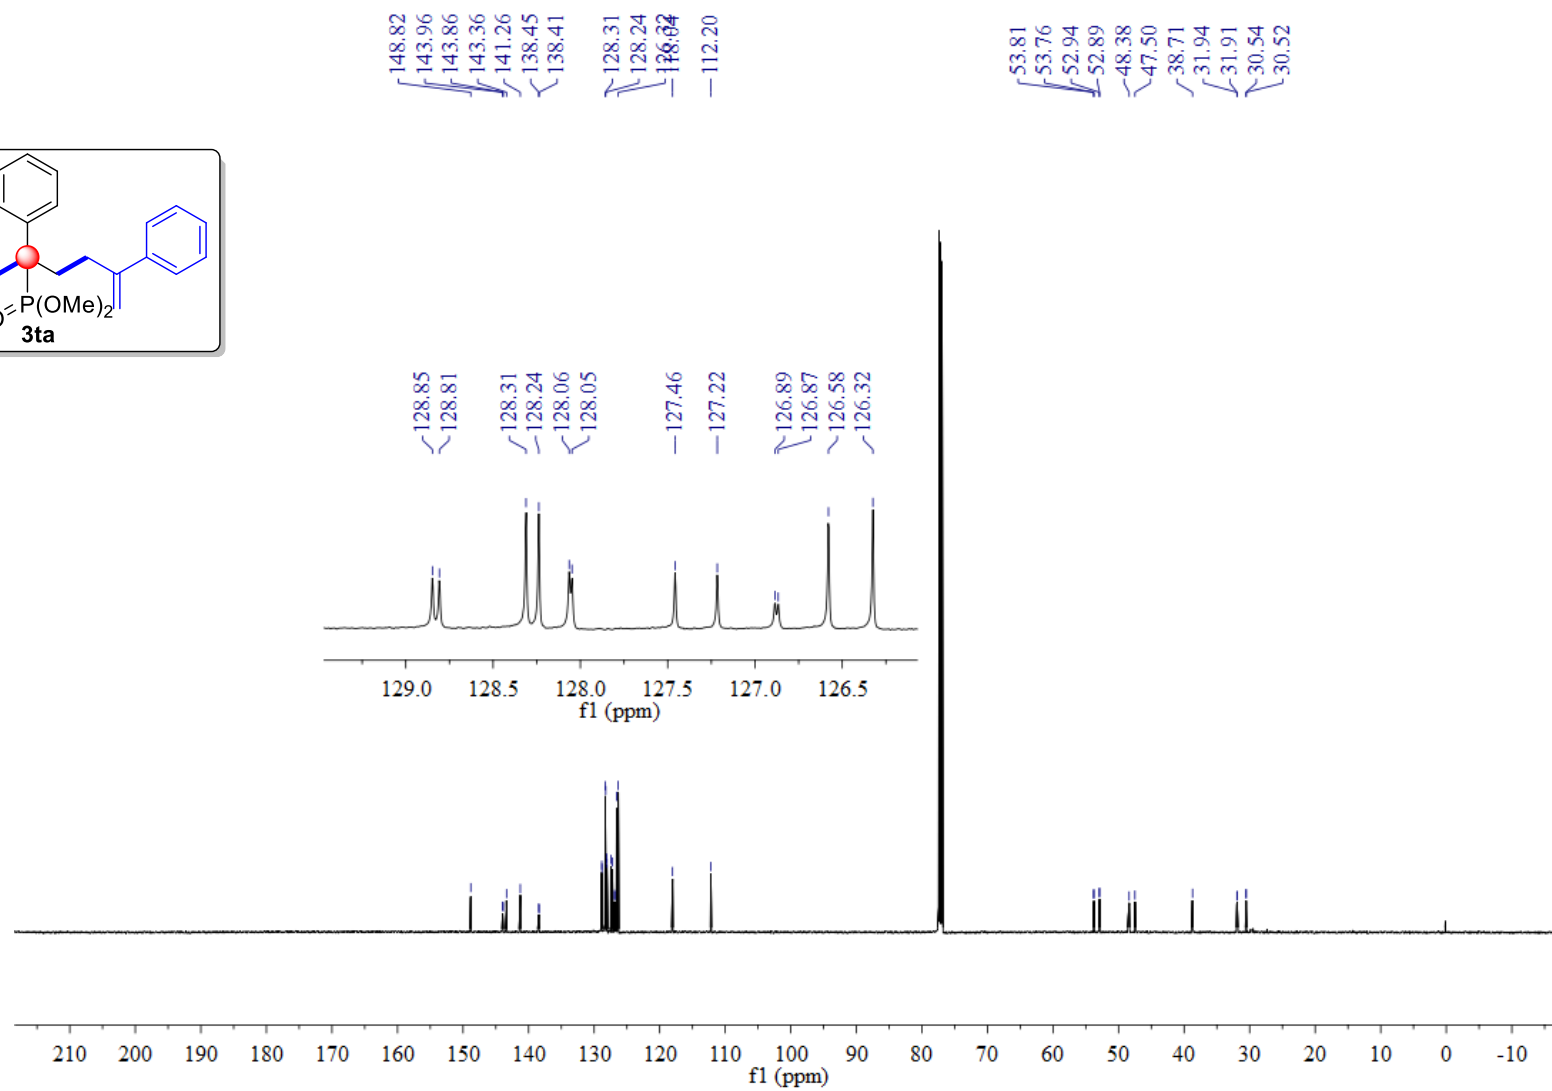

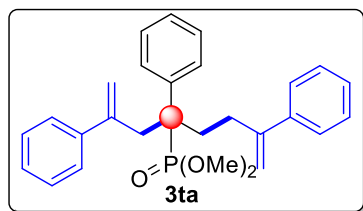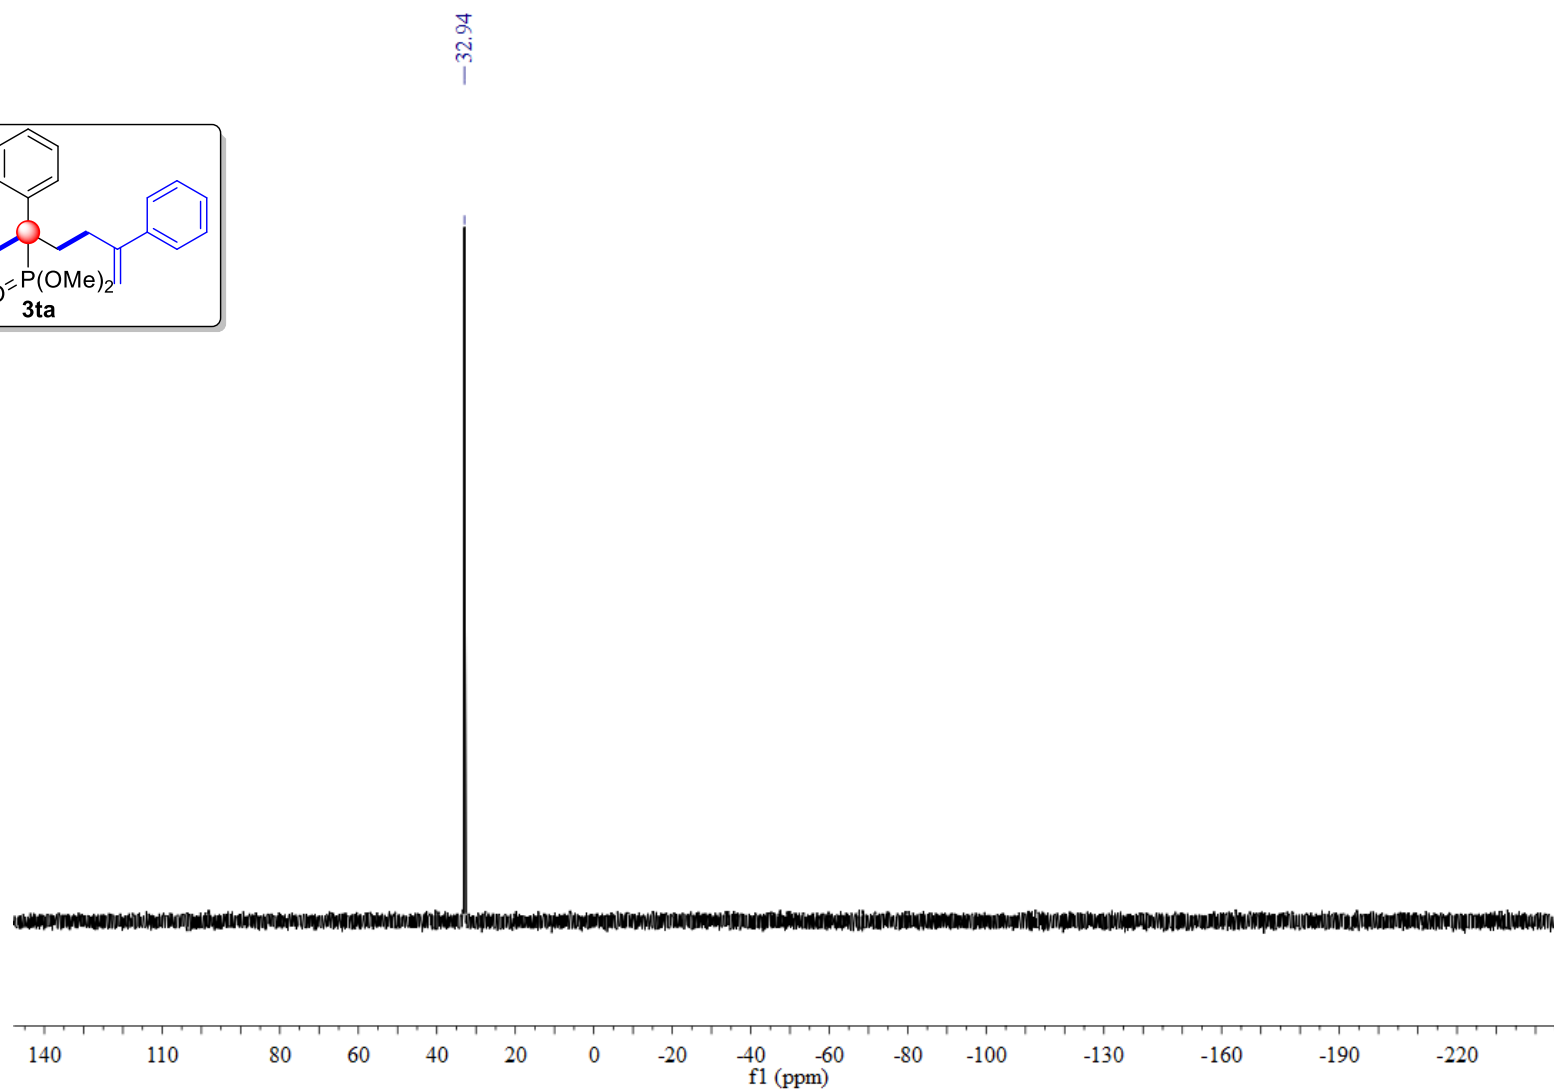

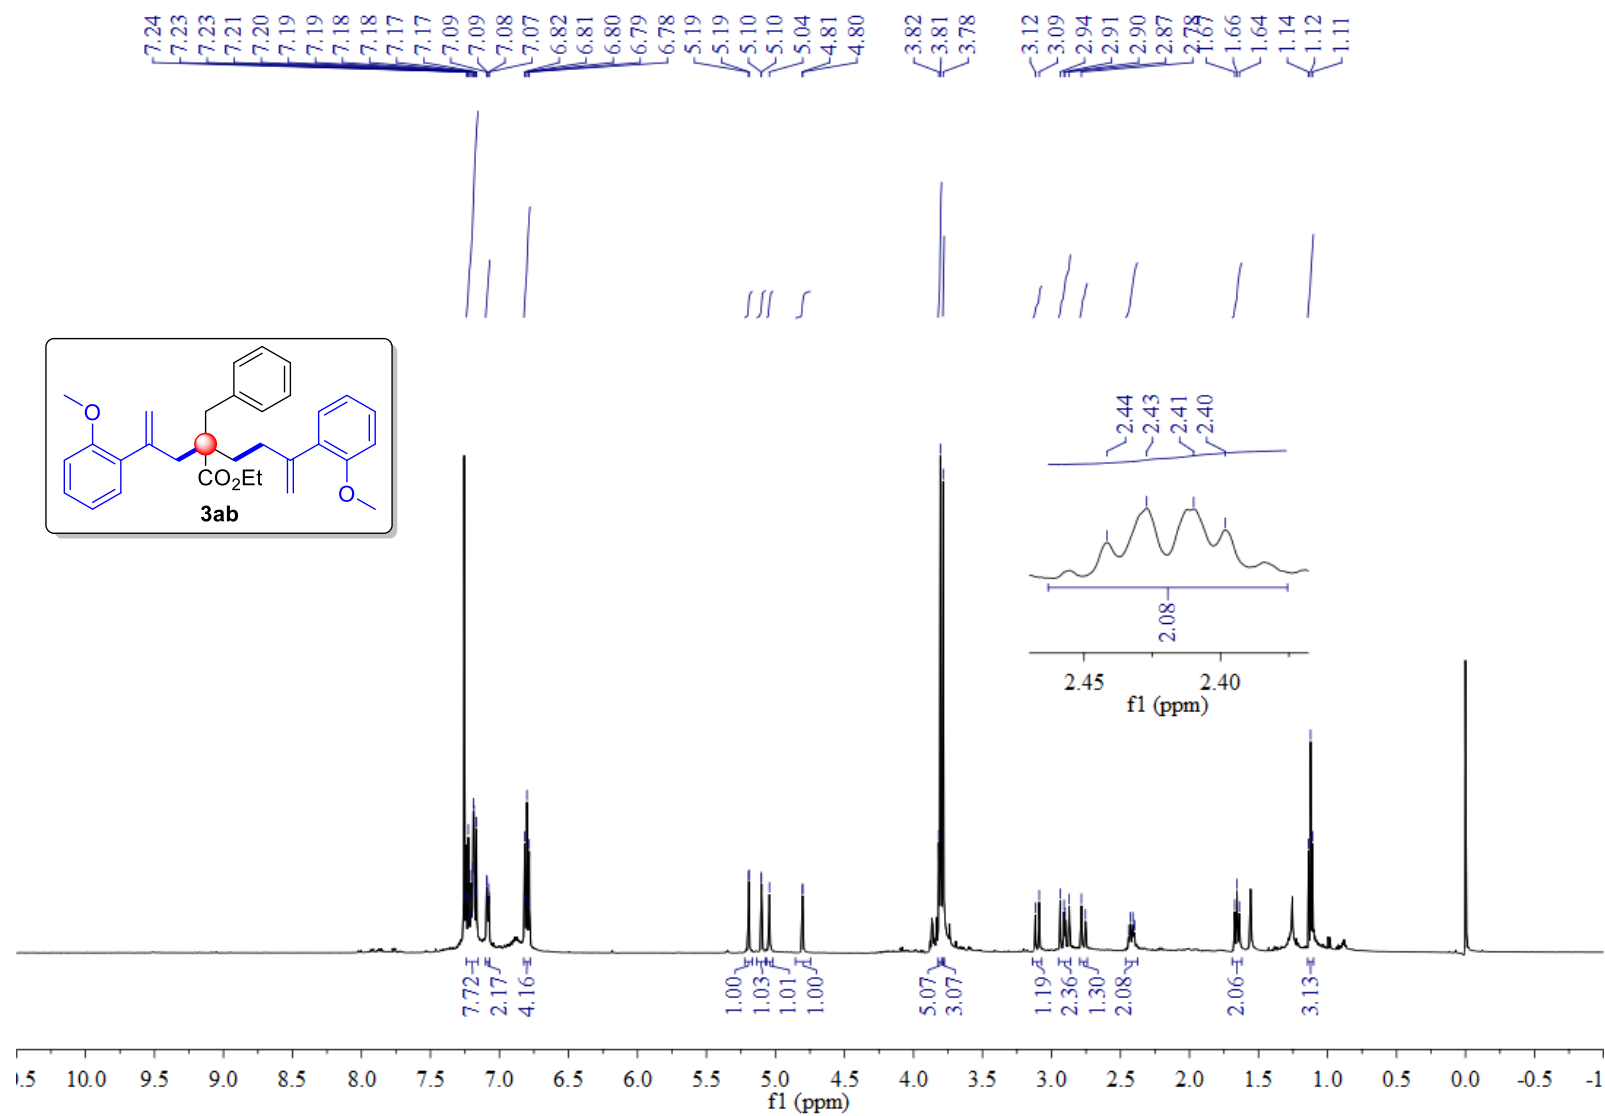

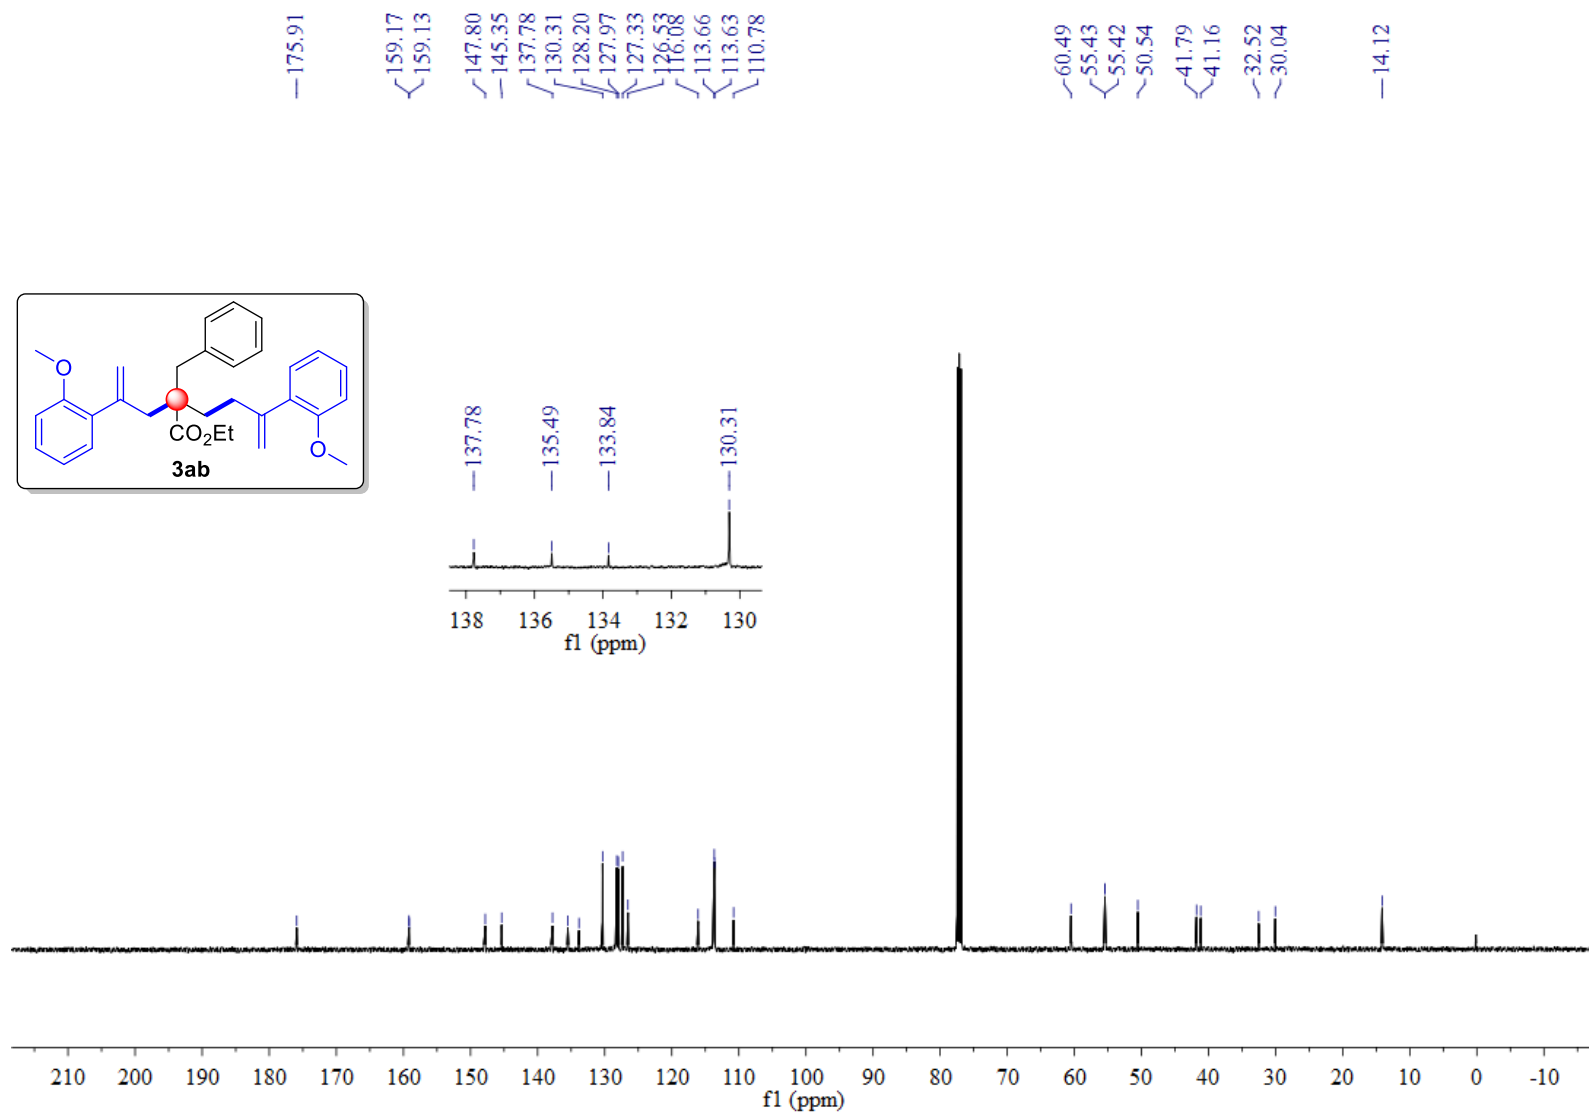

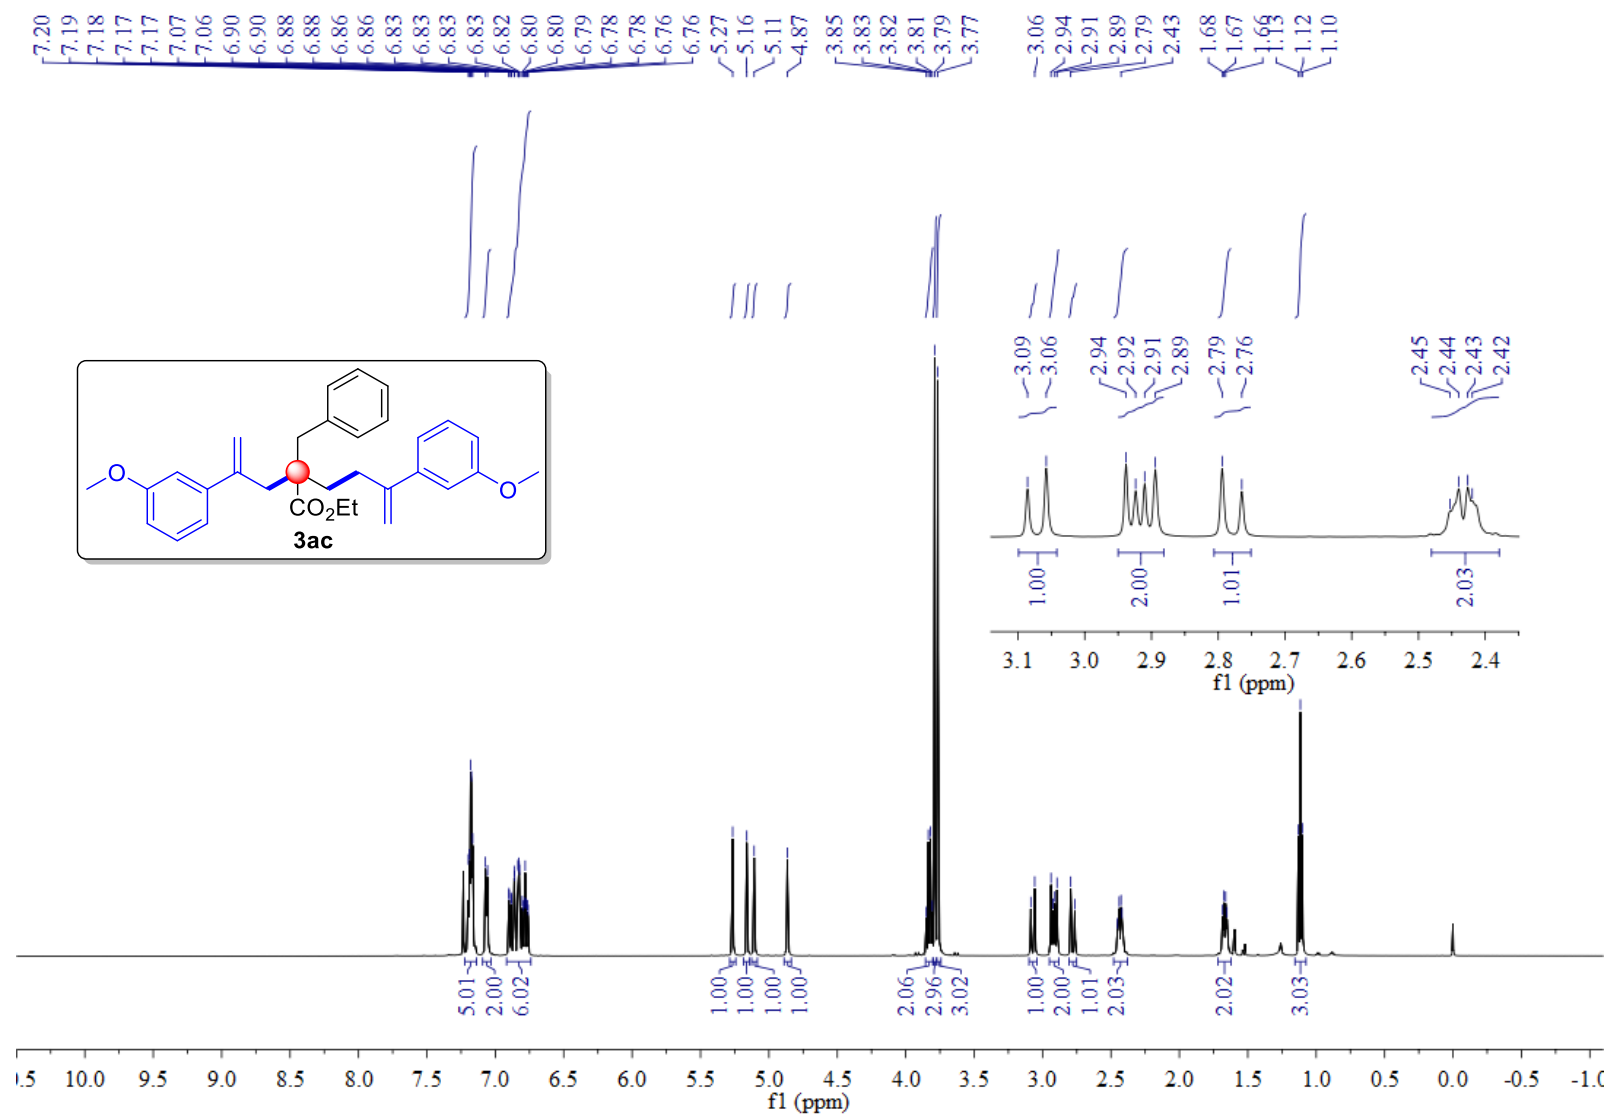

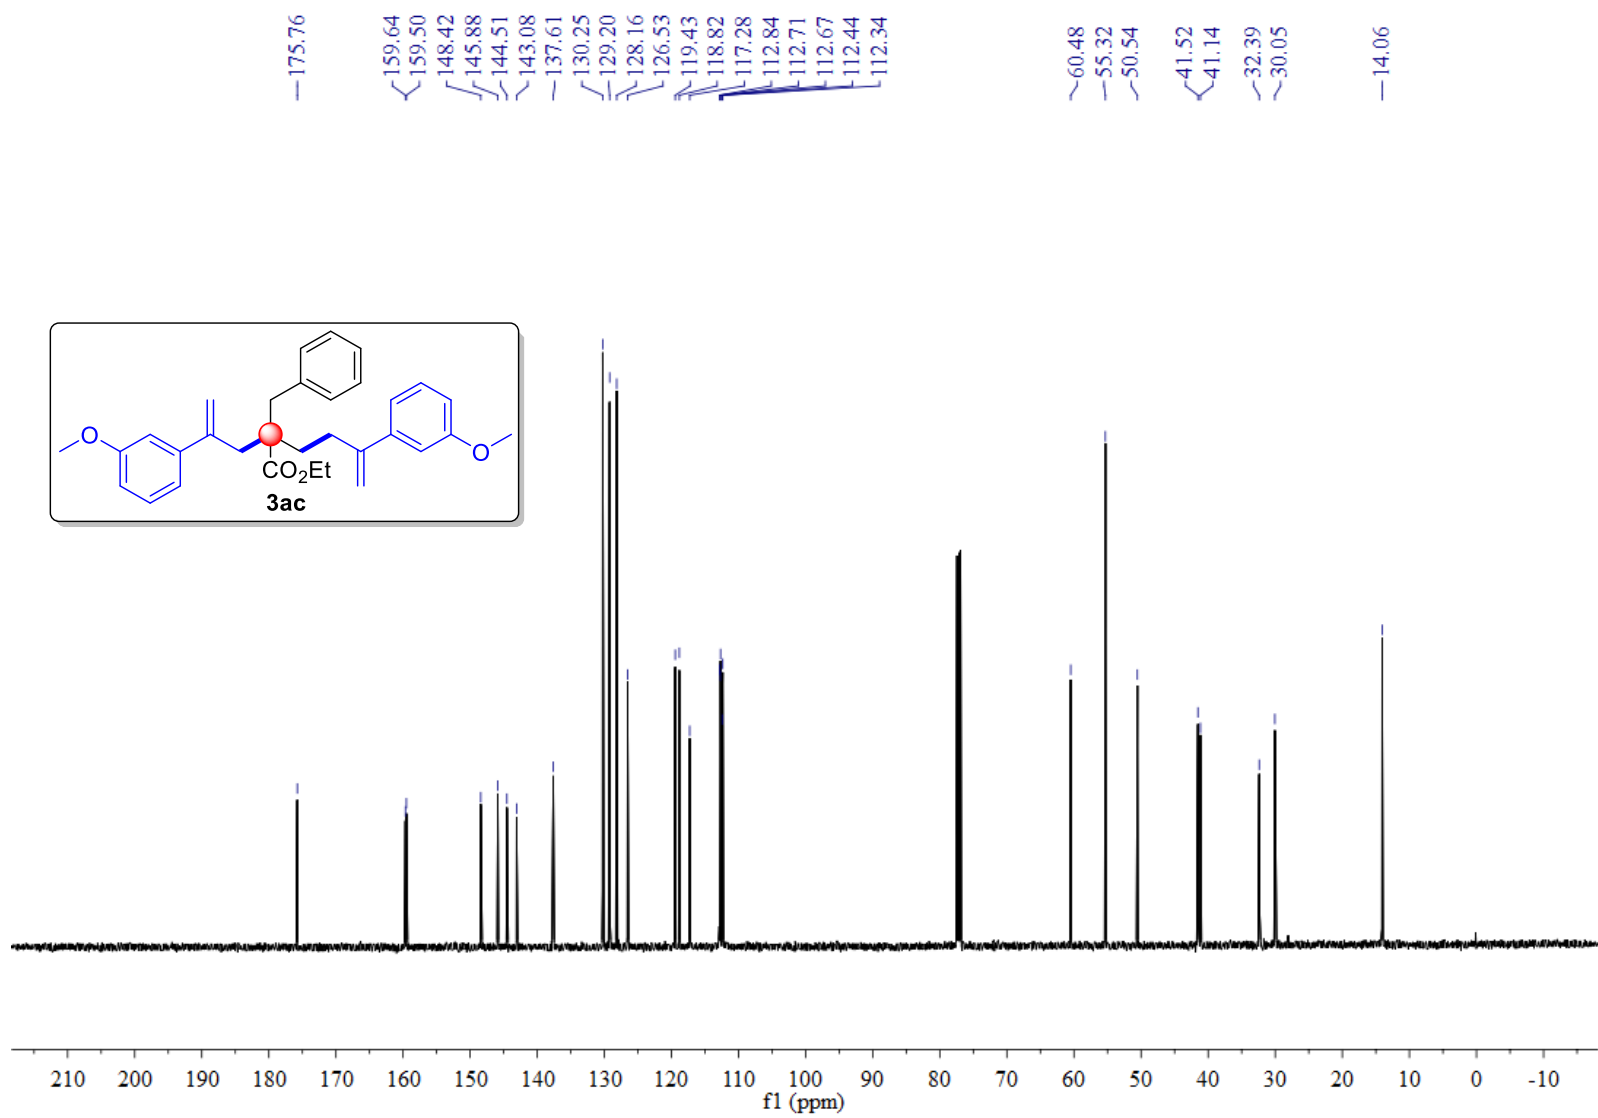

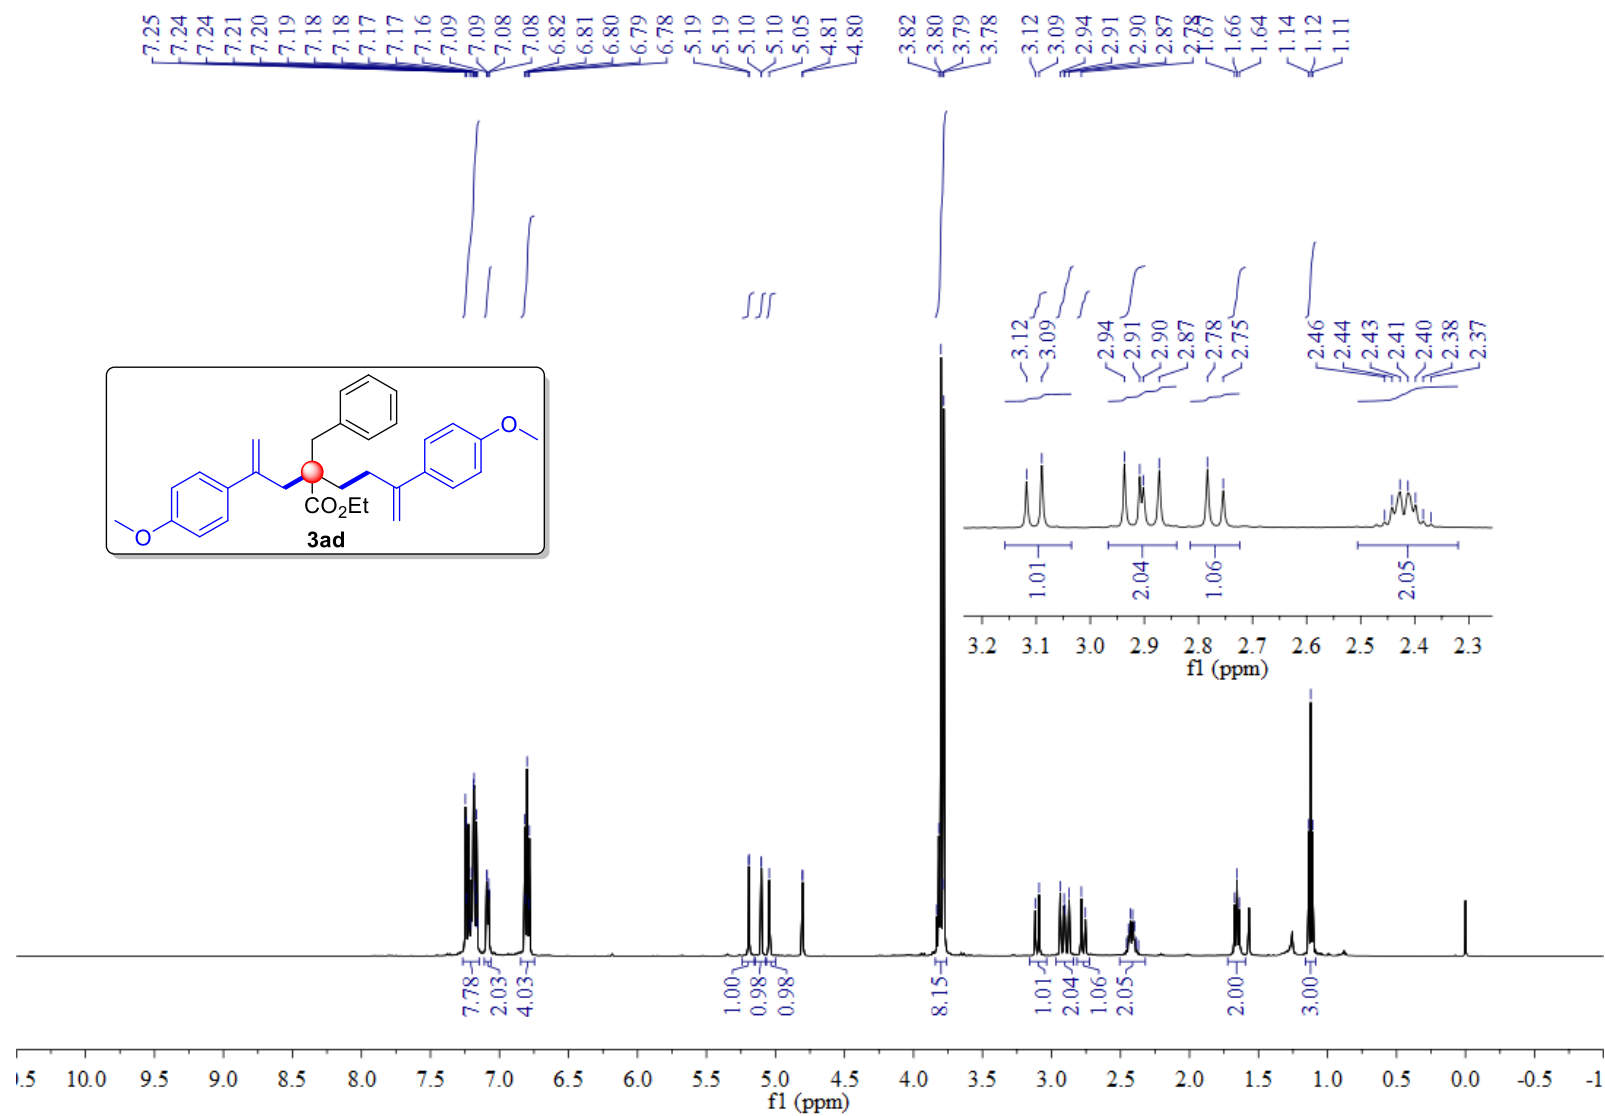

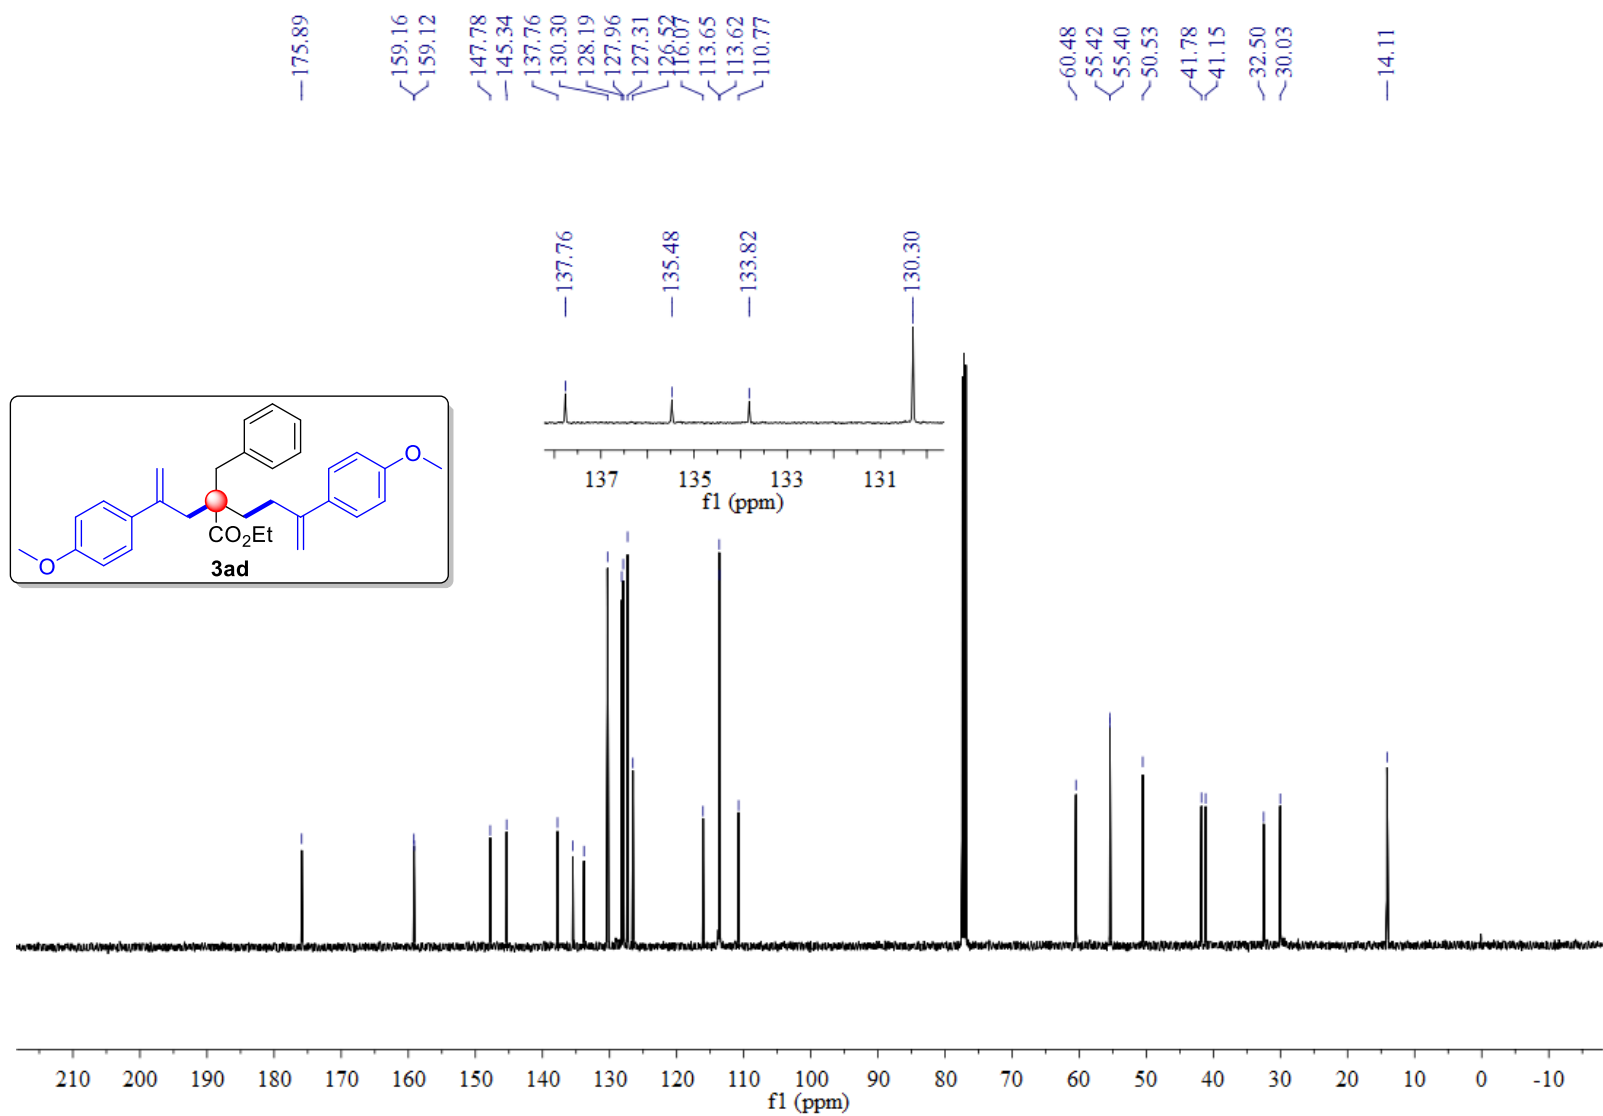

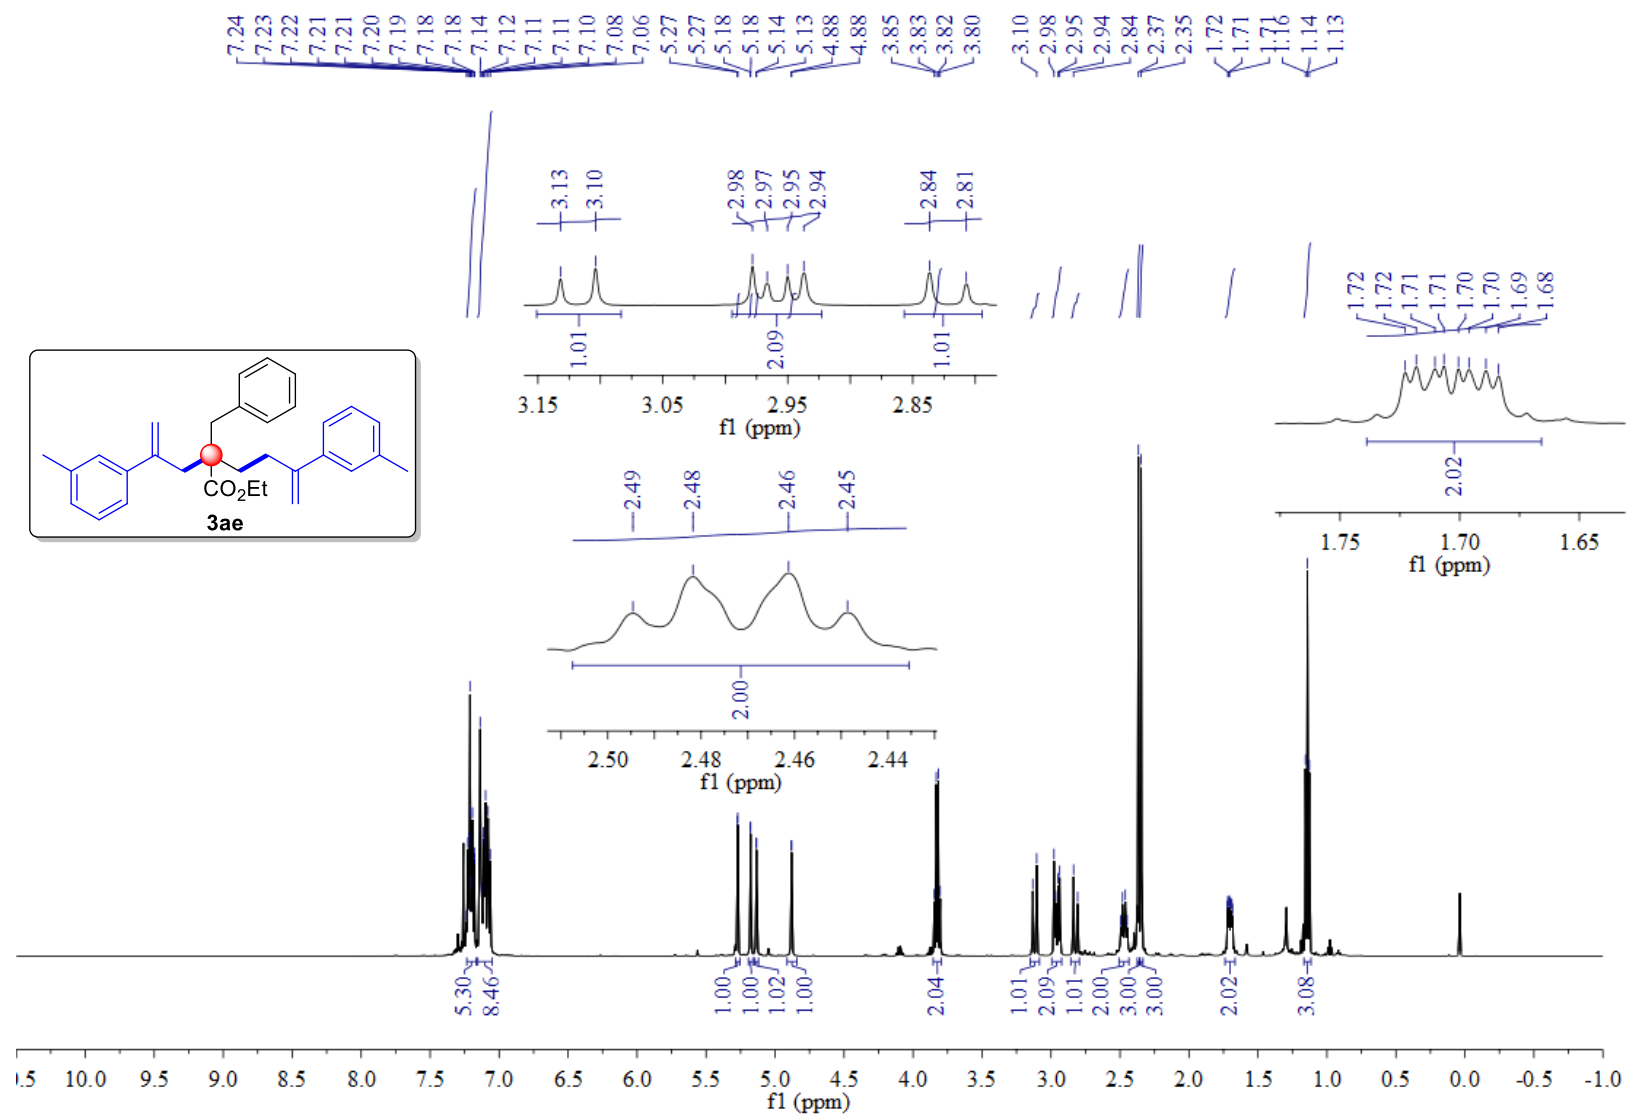

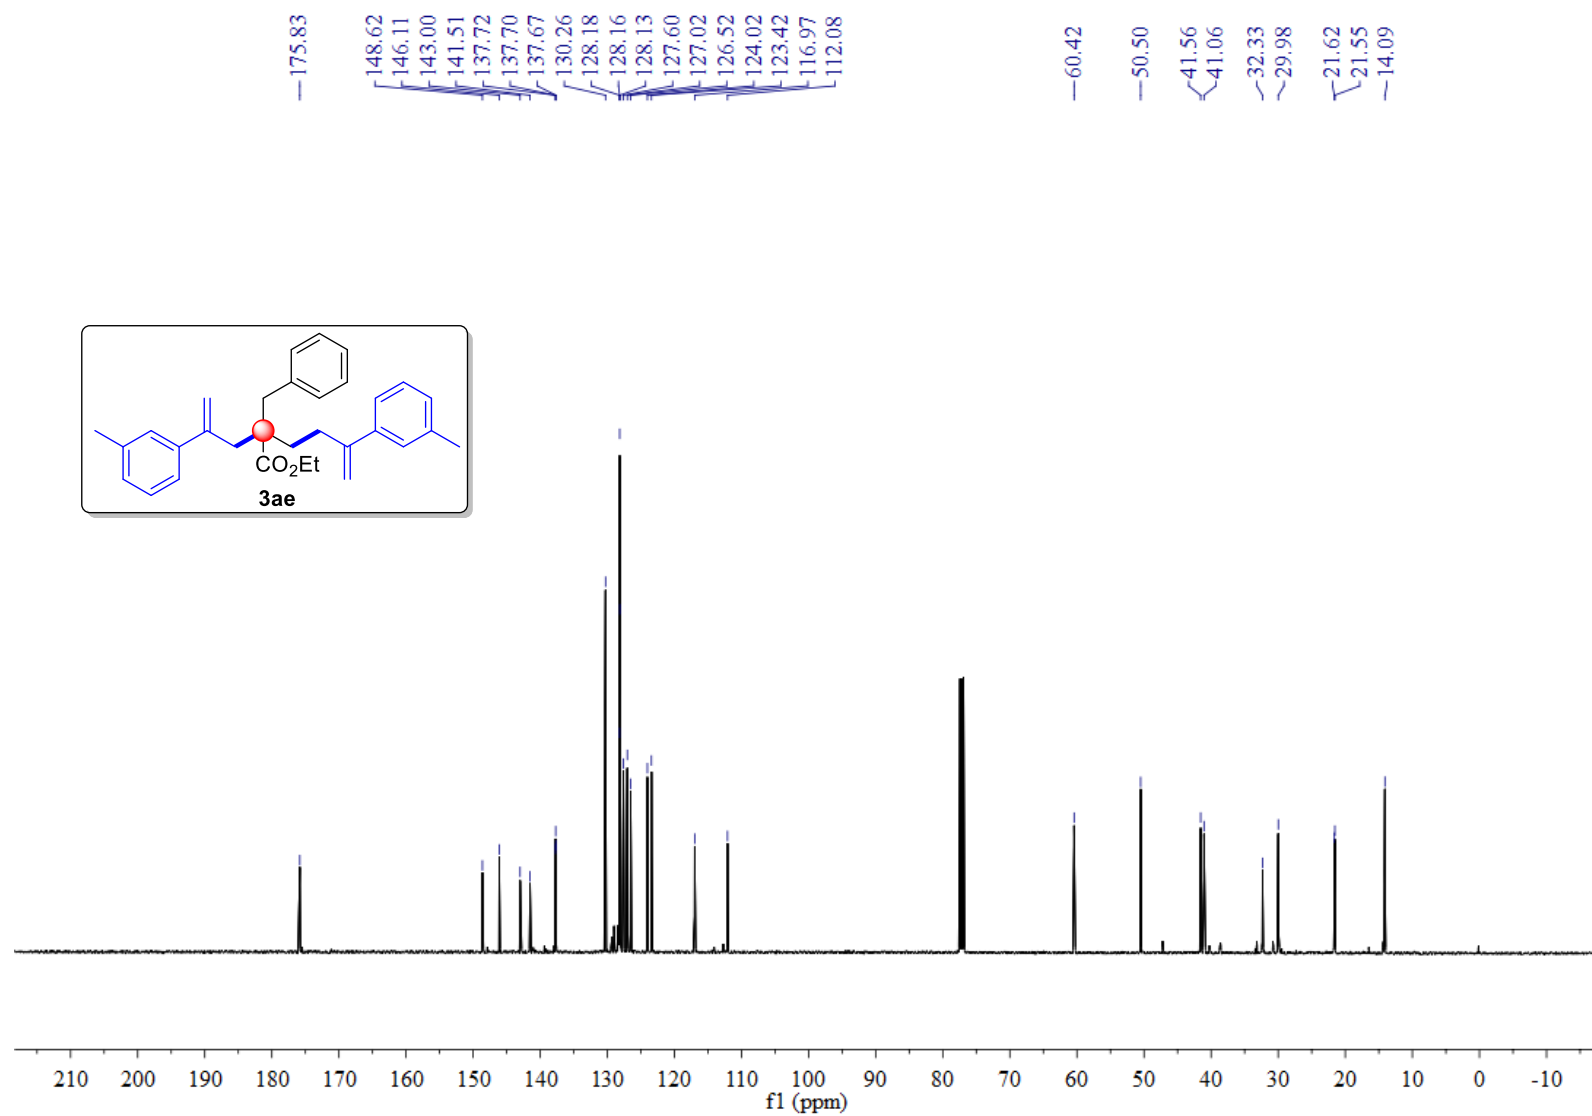

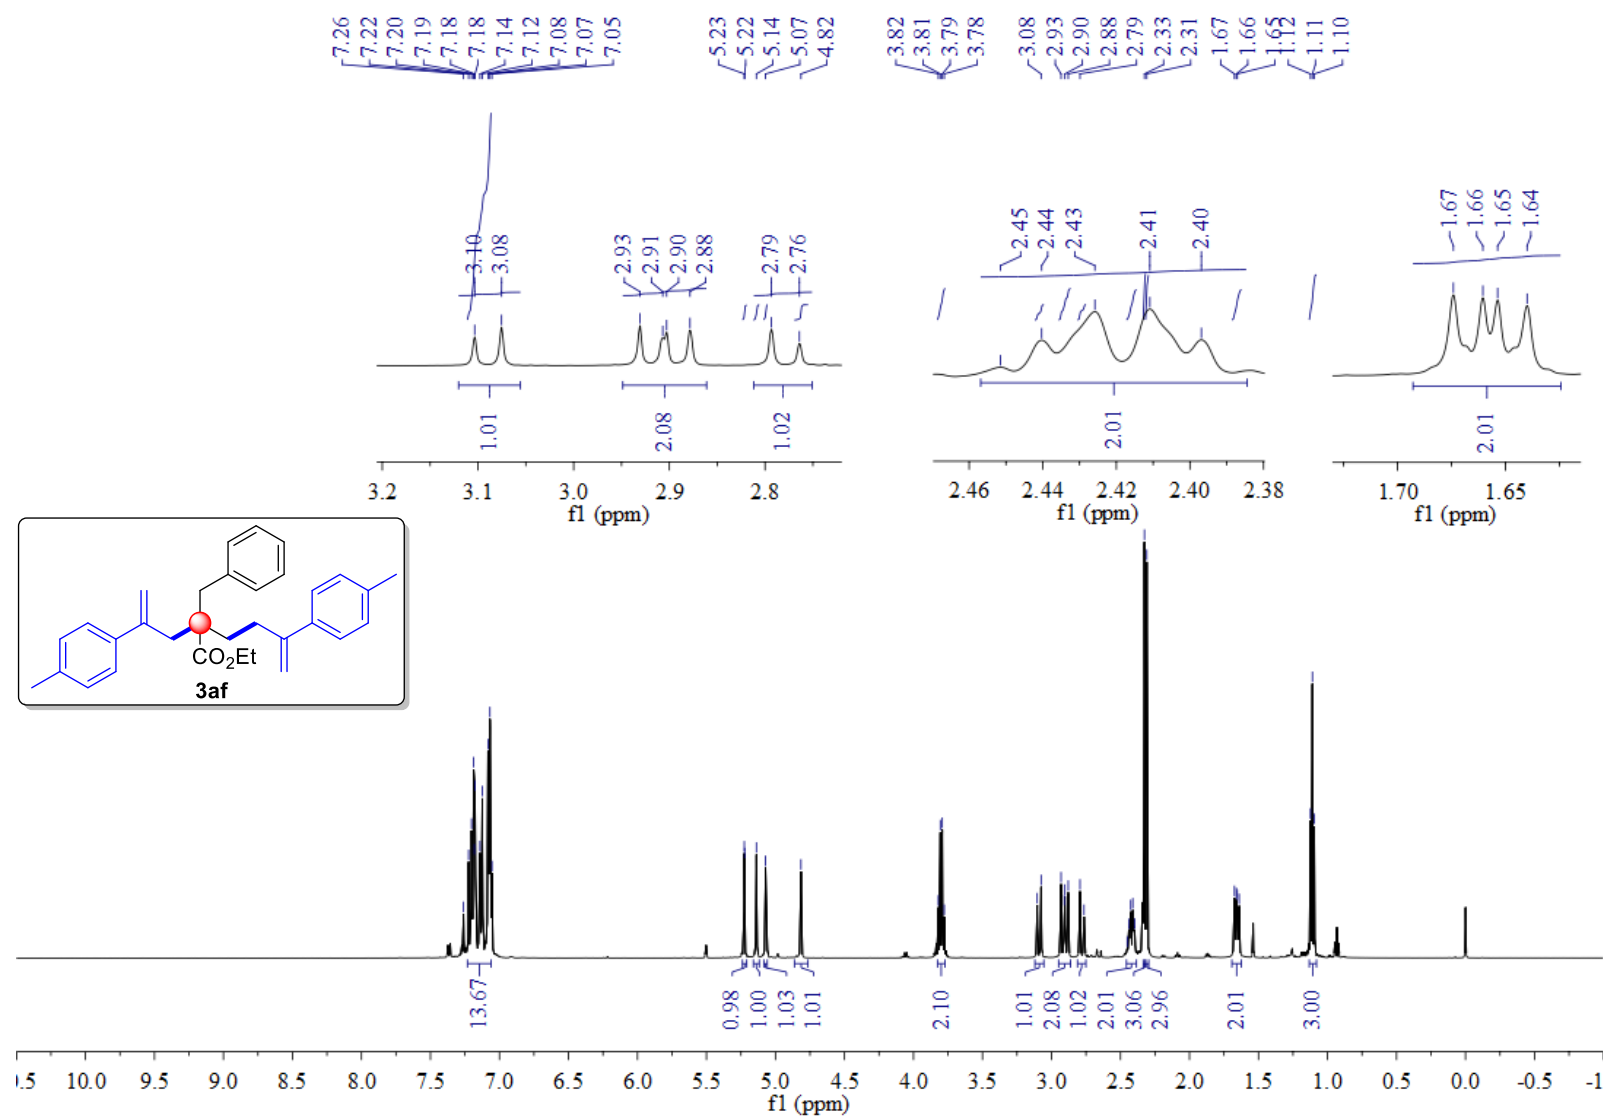

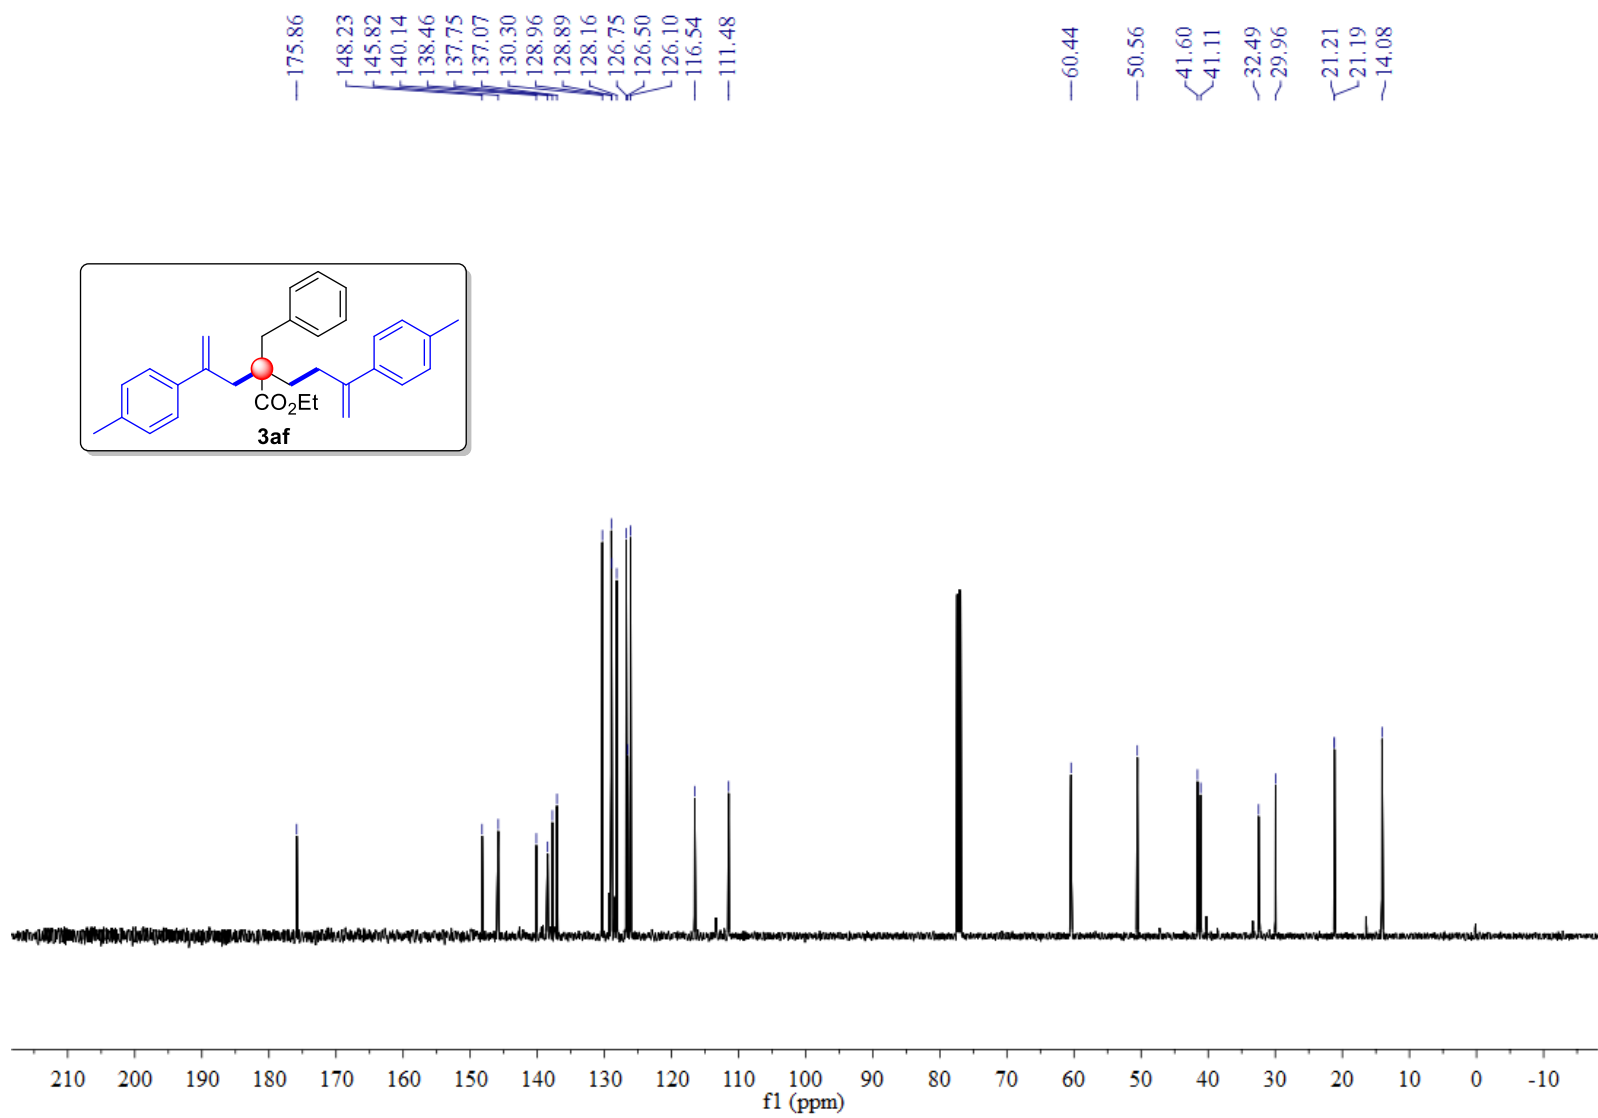

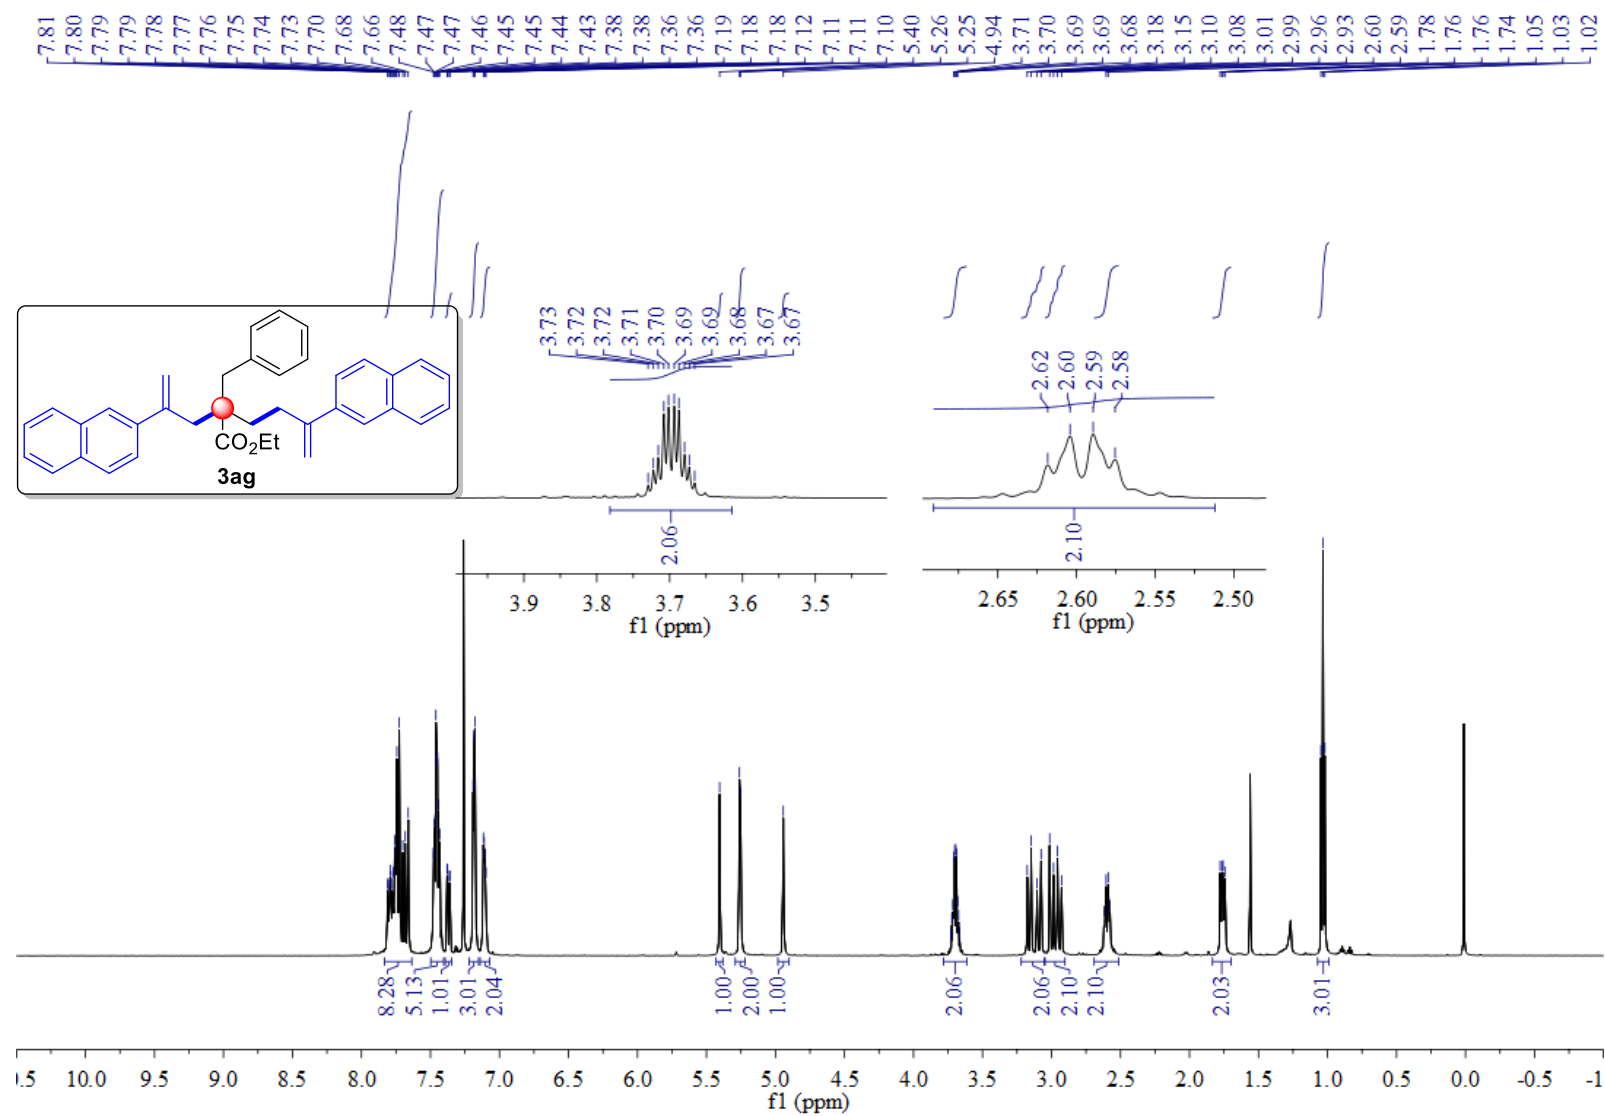

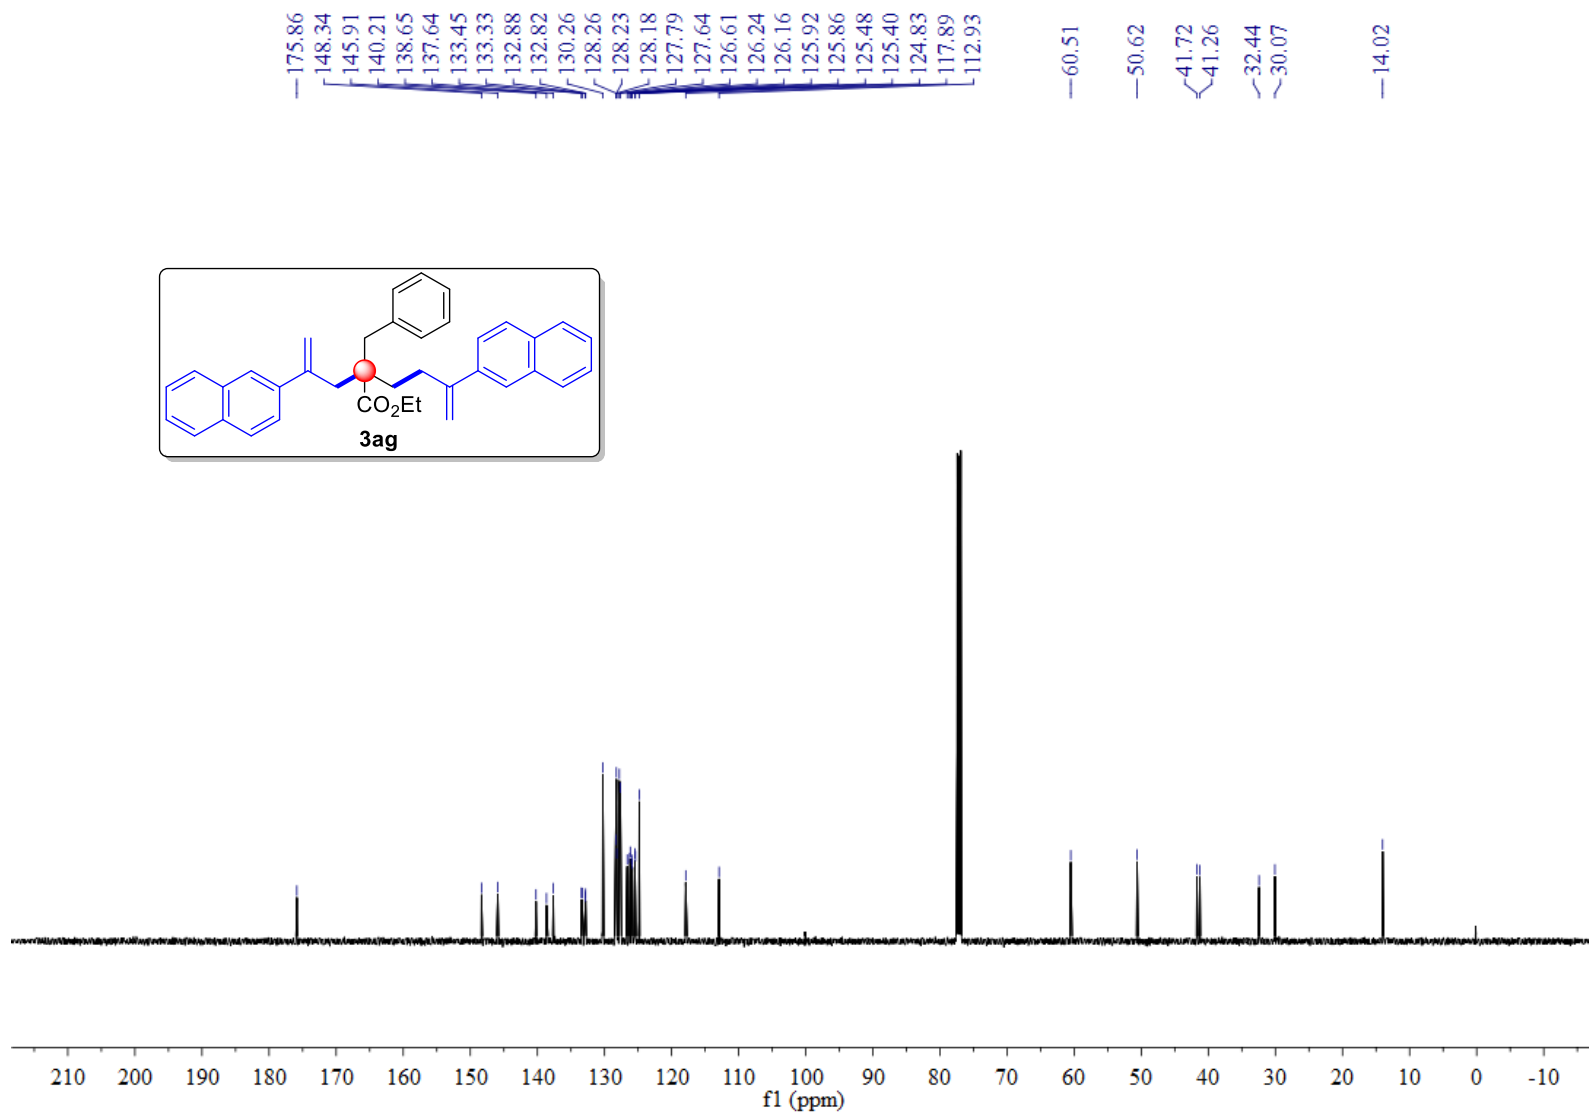



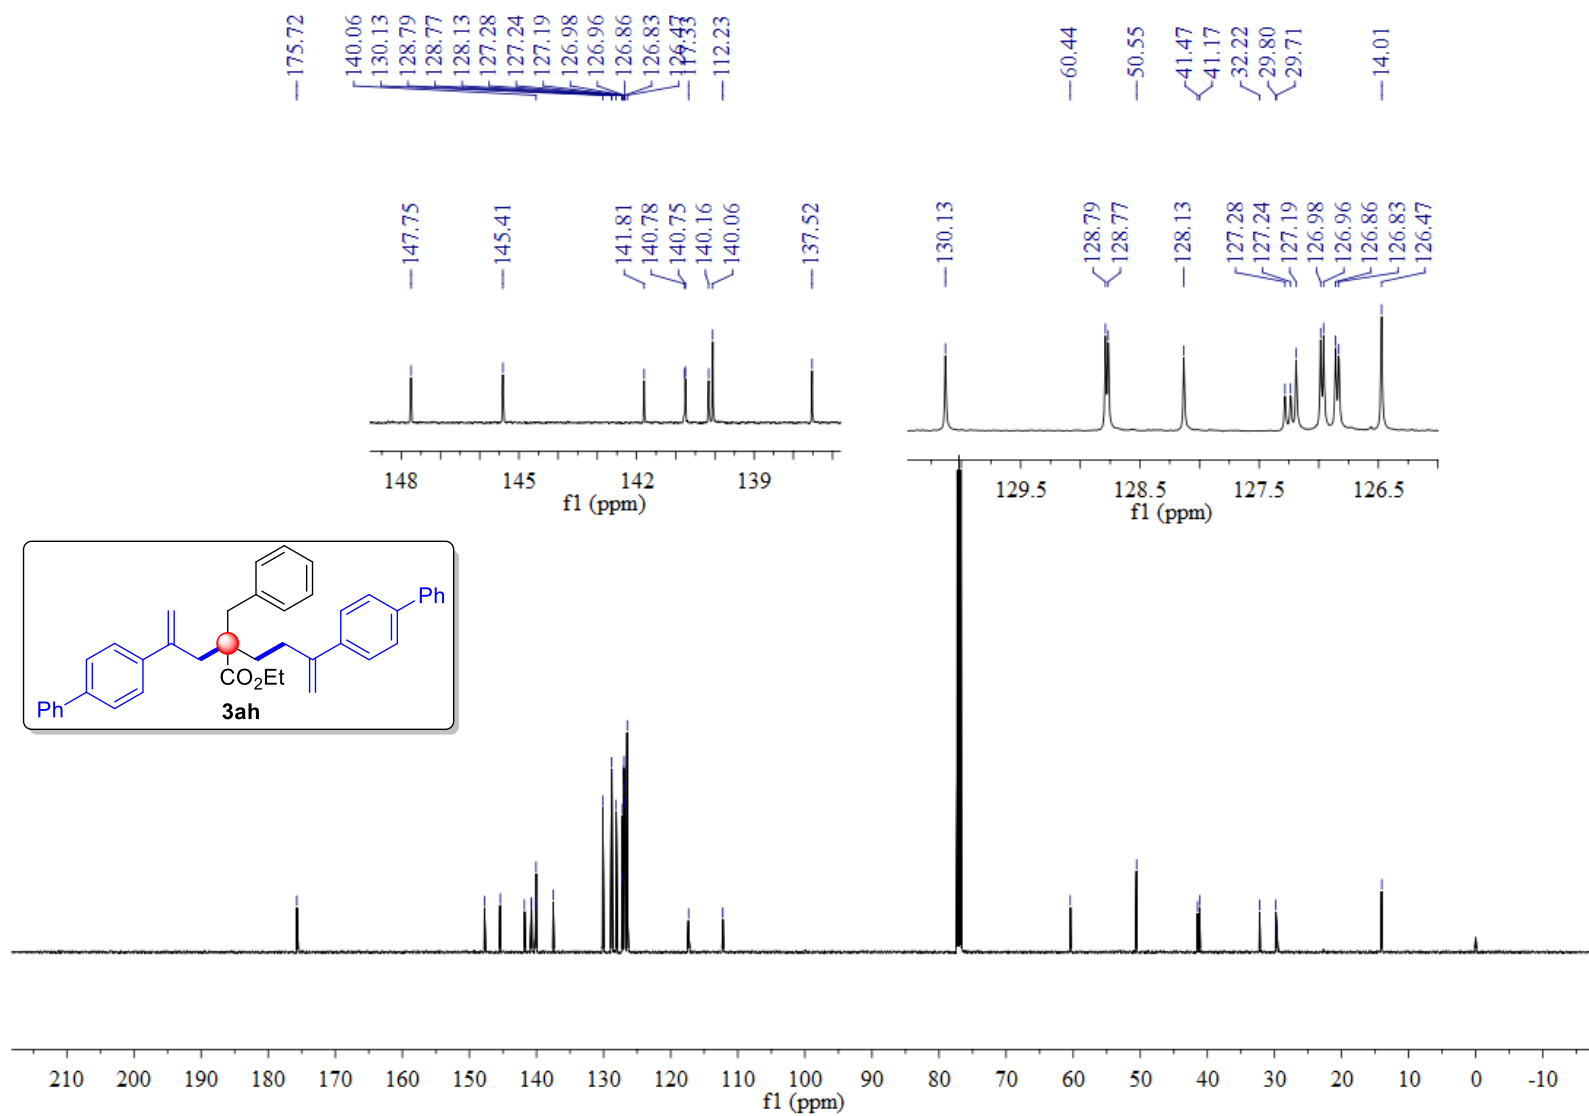

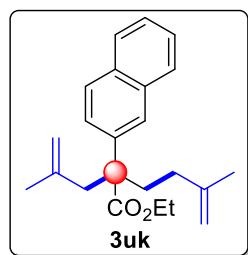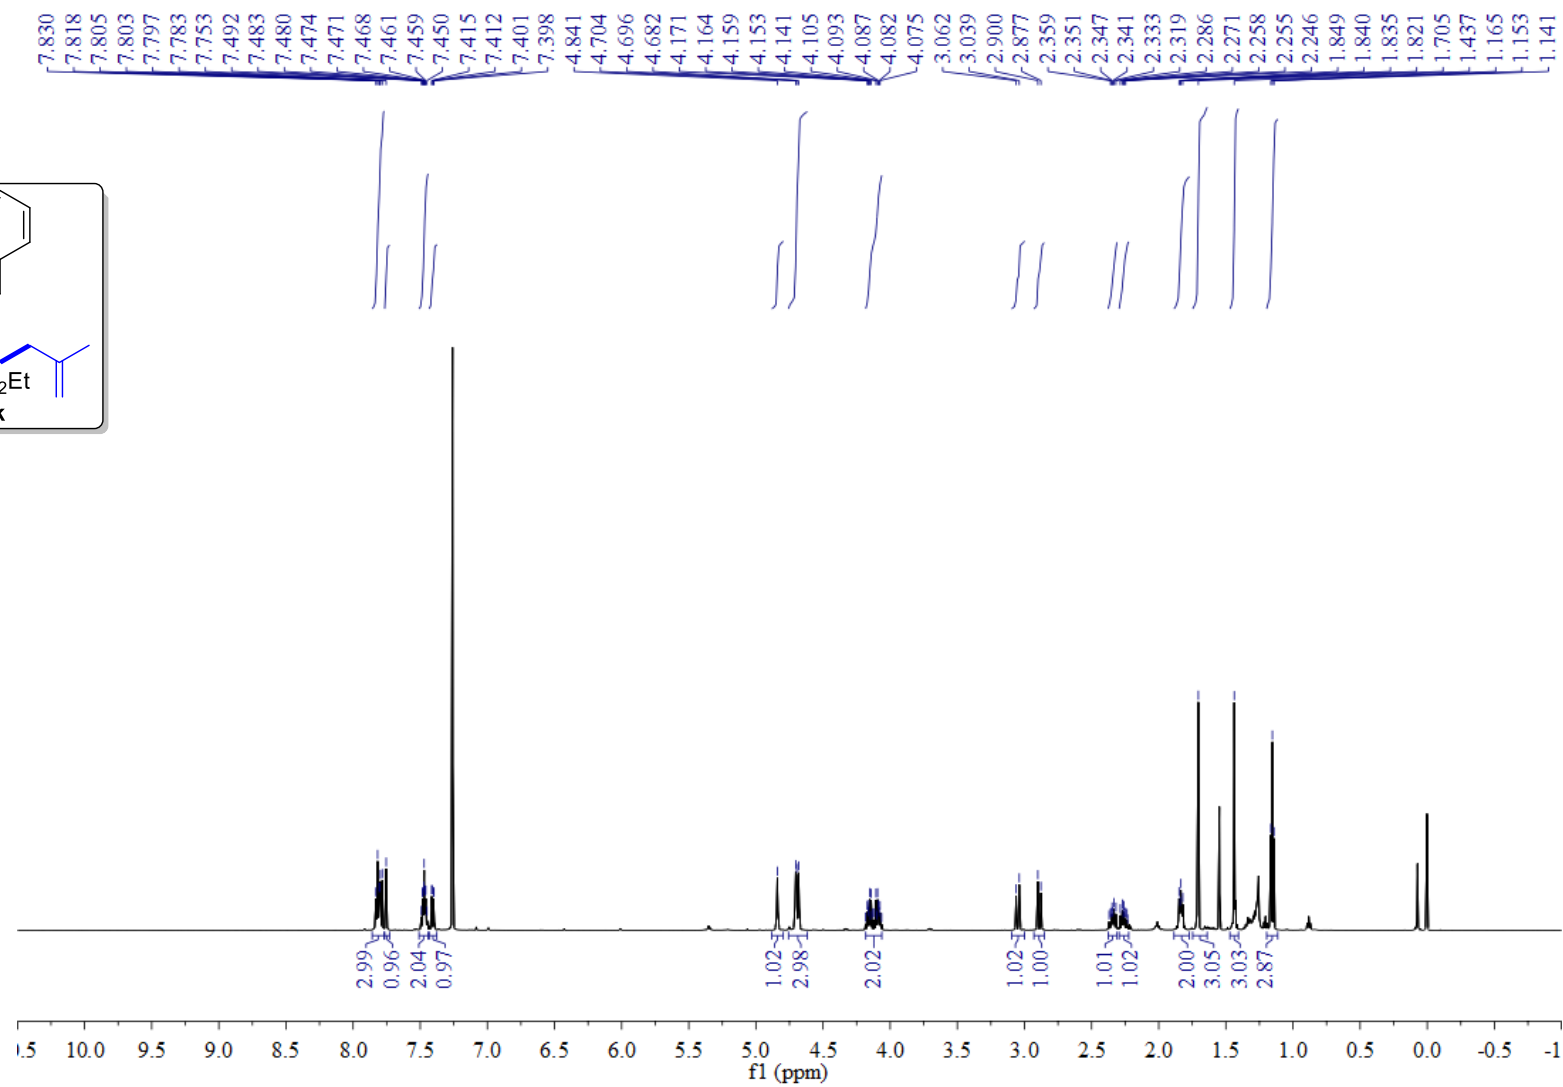

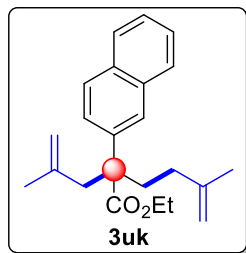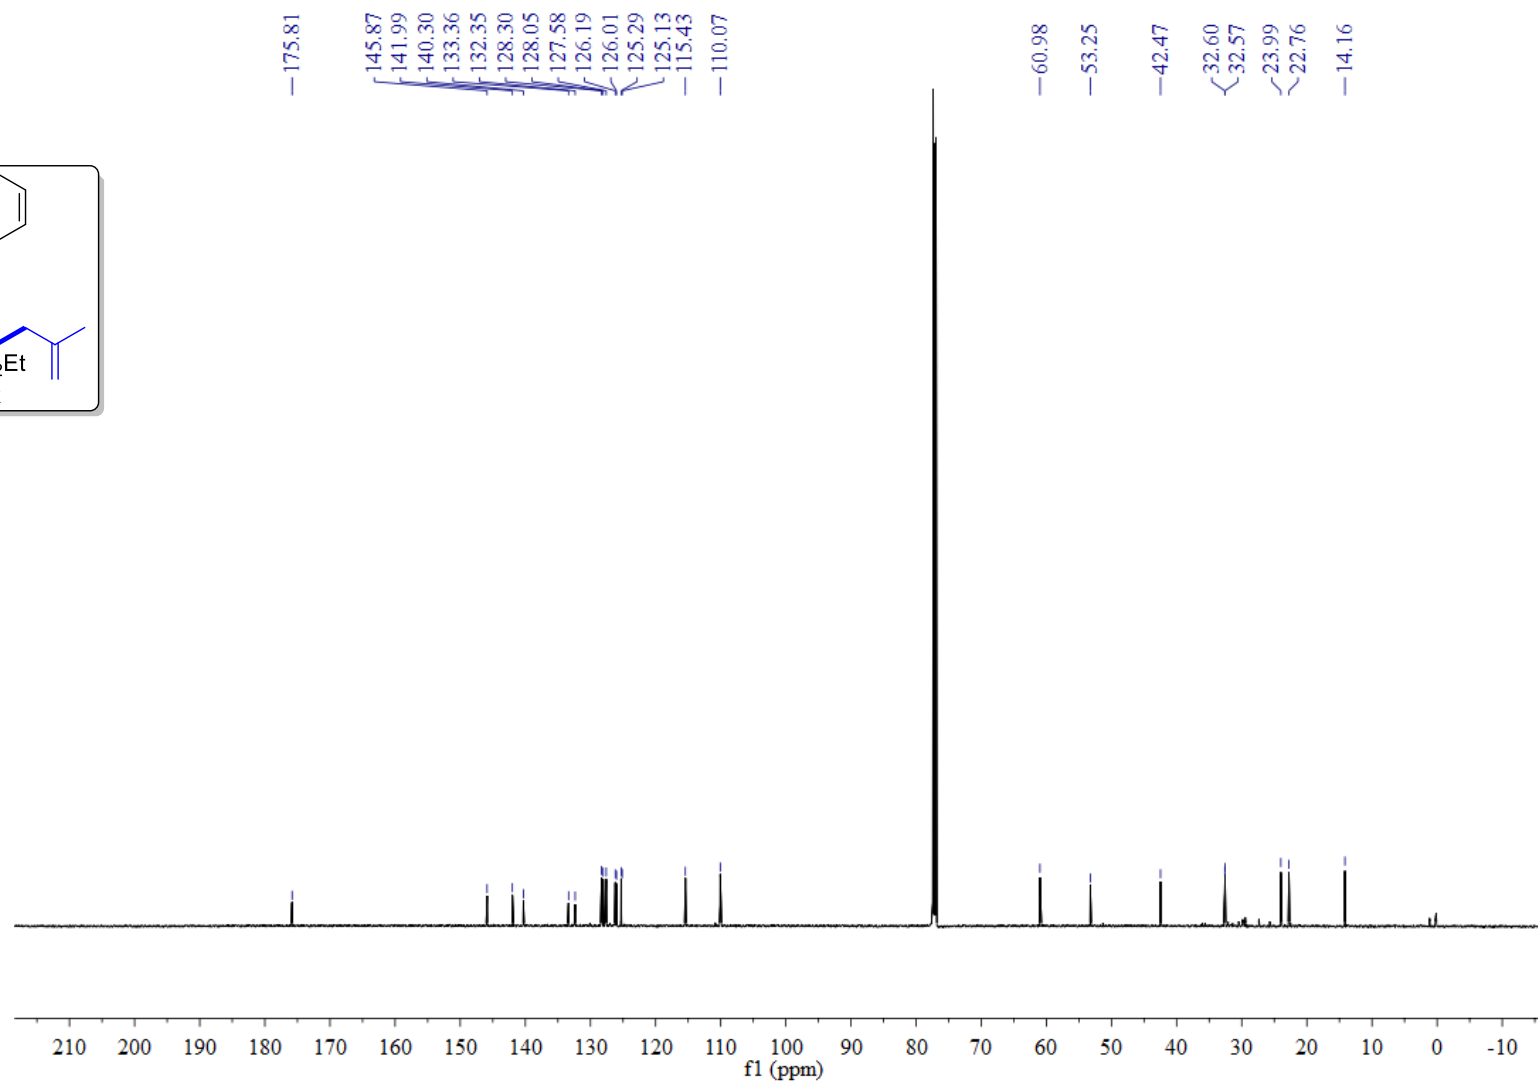

Supplement: d4ob00116h1.pdf [file d4ob00116h1.pdf]
